# Supplementary material for: Comparison of DNA Extraction Methods in Analysis of Salivary Bacterial Communities
Source: PLoS One. 2013 Jul 3;8(7):e67699. doi: 10.1371/journal.pone.0067699 (PMC3701005; doi:10.1371/journal.pone.0067699)
Supplement: Table S2 — Relative abundance of taxa inferred from pyrosequenced 16S rDNA amplicon libraries. Data from six analysis pipelines are given for different taxonomic ranks (phylum, class, order, family, genus, OTU). Sample IDs: Extraction method (E, enzymatic; M, mechanical)_Extraction # (1–3)_PCR # (1 and 2 stand for different barcode sequences in the reverse PCR primer). (XLSX) [file pone.0067699.s004.xlsx]

## Sheet: Phylum
Pipeline 1														Pipeline 2														Pipeline 3														Pipeline 4
	E_1_1	E_1_2	E_2_1	E_2_2	E_3_1	E_3_2	M_1_1	M_1_2	M_2_1	M_2_2	M_3_1	M_3_2			E_1_1	E_1_2	E_2_1	E_2_2	E_3_1	E_3_2	M_1_1	M_1_2	M_2_1	M_2_2	M_3_1	M_3_2			E_1_1	E_1_2	E_2_1	E_2_2	E_3_1	E_3_2	M_1_1	M_1_2	M_2_1	M_2_2	M_3_1	M_3_2			E_1_1	E_1_2	E_2_1	E_2_2	E_3_1	E_3_2	M_1_1
Actinobacteria	3.4188	3.69451	3.52909	3.52909	2.64682	2.67439	4.71464	5.5142	5.04549	4.63193	5.54177	5.76234		Actinobacteria	3.32882	3.65359	3.51827	3.46414	2.73342	2.11096	4.9797	5.49391	4.57375	4.89851	5.54804	6.33288		Actinobacteria	3.85825	3.85825	3.62961	3.82967	3.22949	2.85796	5.08717	5.8874	4.65847	4.91569	5.51586	5.8874		Actinobacteria	3.4188	3.69451	3.52909	3.52909	2.64682	2.67439	4.71464
Bacteroidetes	6.58947	10.091	6.34133	8.13344	7.71988	8.87786	7.77502	10.1461	11.3317	10.8078	8.74001	9.81527		Bacteroidetes	8.17321	11.3667	7.19892	10.5277	9.52639	10.3924	8.09202	10.6089	12.7199	11.7997	9.09337	10.0947		Bacteroidetes	6.45899	9.97428	5.17291	8.23092	8.05945	8.94541	7.40211	9.97428	11.489	9.9457	8.6882	9.91712		Bacteroidetes	6.58947	10.091	6.34133	8.13344	7.71988	8.87786	7.77502
Firmicutes	28.5636	27.8743	29.115	28.5084	26.8541	27.3229	16.7907	17.4249	15.7982	15.2468	16.8459	16.7632		Cyanobacteria	0	0	0	0	0	0	0	0	0.0270636	0	0	0		Firmicutes	27.465	29.1798	28.894	28.0652	25.9789	27.122	16.8048	17.0049	14.9757	15.2043	15.6045	16.5476		Firmicutes	28.5636	27.8743	29.115	28.5084	26.8541	27.3229	16.7907
Fusobacteria	4.6595	6.97546	5.73477	6.69975	5.34877	6.5619	5.18335	4.82492	12.1864	11.3041	5.12821	6.12076		Firmicutes	28.065	27.0636	28.525	27.1719	26.9012	26.3058	16.3464	17.2124	15.1827	15.5616	15.8863	16.8606		Fusobacteria	3.88682	5.51586	4.82995	5.23007	3.94398	5.40154	3.80109	4.31552	12.0892	11.2032	5.14433	4.60131		Fusobacteria	4.6595	6.97546	5.73477	6.69975	5.34877	6.5619	5.18335
Proteobacteria	55.2798	49.2418	53.5704	51.0615	55.914	52.4676	61.1249	57.7612	50.3722	52.5779	59.5809	57.2925		Fusobacteria	4.81732	7.71313	5.60217	5.89986	5.16915	5.89986	4.79026	4.89851	12.1786	11.8539	5.92693	5.79161		Proteobacteria	57.102	49.9	55.9017	53.3009	57.2735	54.044	63.3324	59.0169	52.1292	53.8154	61.1318	59.3312		Proteobacteria	55.2798	49.2418	53.5704	51.0615	55.914	52.4676	61.1249
Spirochaetes	0.110284	0.27571	0.192997	0.110284	0.110284	0.192997	0.578991	0.744417	1.7094	1.32341	0.468707	0.82713		Proteobacteria	54.3166	47.6861	53.3694	50.636	54.2896	53.0988	61.6779	57.4019	50.1218	50.7713	59.5399	56.7524		Spirochaetes	0.0857388	0.314376	0.200057	0.200057	0.171478	0.171478	0.371535	0.457274	1.65762	1.08602	0.628751	0.71449		Spirochaetes	0.110284	0.27571	0.192997	0.110284	0.110284	0.192997	0.578991
SR1	0.055142	0	0	0	0.055142	0.027571	0.027571	0.137855	0.110284	0.110284	0.137855	0.165426		Spirochaetes	0.0811908	0.270636	0.189445	0.135318	0.0541272	0.162382	0.433018	0.703654	1.67794	1.08254	0.541272	0.622463		SR1	0.0571592	0	0	0.0571592	0.0571592	0.0285796	0.0571592	0.114318	0.114318	0.114318	0.114318	0.200057		SR1	0.055142	0	0	0	0.055142	0.027571	0.027571
Synergistetes	0.137855	0.027571	0.082713	0.110284	0.110284	0.137855	0.165426	0.192997	0.385994	0.413565	0.248139	0.303281		SR1	0.0270636	0	0	0	0.0270636	0.0270636	0.0541272	0.162382	0.0270636	0.0811908	0.162382	0.135318		Synergistetes	0.142898	0.0857388	0.0857388	0.0857388	0.142898	0.142898	0.171478	0.228637	0.314376	0.457274	0.428694	0.171478		Synergistetes	0.137855	0.027571	0.082713	0.110284	0.110284	0.137855	0.165426
Tenericutes	0.330852	0.248139	0.192997	0.330852	0.385994	0.441136	0.716846	0.716846	0.578991	0.799559	0.689275	0.441136		Synergistetes	0.0811908	0.0541272	0.0811908	0.108254	0.108254	0.0811908	0.189445	0.216509	0.433018	0.460081	0.243572	0.243572		Tenericutes	0.114318	0.171478	0.114318	0	0.142898	0.142898	0.228637	0.171478	0.142898	0.285796	0.0857388	0.257216		Tenericutes	0.330852	0.248139	0.192997	0.330852	0.385994	0.441136	0.716846
TM7	0.661704	1.32341	1.07527	1.32341	0.771988	1.0477	2.50896	2.06782	2.04025	2.31596	2.26082	2.0954		Tenericutes	0.2977	0.243572	0.189445	0.270636	0.351827	0.622463	0.541272	0.703654	0.433018	0.622463	0.487145	0.487145		TM7	0.68591	0.885967	1.00029	0.857388	0.857388	1.00029	2.34353	2.22921	2.00057	2.42927	2.14347	1.88625		TM7	0.661704	1.32341	1.07527	1.32341	0.771988	1.0477	2.50896
														TM7	0.622463	1.56969	1.05548	1.1908	0.703654	1.00135	2.51691	2.05683	2.13802	2.24628	2.13802	2.24628		unclassified	0.142898	0.114318	0.171478	0.142898	0.142898	0.142898	0.400114	0.600171	0.428694	0.543012	0.514433	0.485853
[truncated: 31 more columns]

## Sheet: Class
Pipeline 1														Pipeline 2														Pipeline 3														Pipeline 4
	E_1_1	E_1_2	E_2_1	E_2_2	E_3_1	E_3_2	M_1_1	M_1_2	M_2_1	M_2_2	M_3_1	M_3_2			E_1_1	E_1_2	E_2_1	E_2_2	E_3_1	E_3_2	M_1_1	M_1_2	M_2_1	M_2_2	M_3_1	M_3_2			E_1_1	E_1_2	E_2_1	E_2_2	E_3_1	E_3_2	M_1_1	M_1_2	M_2_1	M_2_2	M_3_1	M_3_2			E_1_1	E_1_2	E_2_1	E_2_2	E_3_1	E_3_2	M_1_1
Actinobacteria	3.4188	3.69451	3.52909	3.52909	2.64682	2.67439	4.71464	5.5142	5.04549	4.63193	5.54177	5.76234		Actinobacteria	3.32882	3.65359	3.51827	3.46414	2.73342	2.11096	4.9797	5.49391	4.57375	4.89851	5.54804	6.33288		Actinobacteria	3.85825	3.85825	3.62961	3.82967	3.22949	2.85796	5.08717	5.8874	4.65847	4.91569	5.51586	5.8874		Actinobacteria	3.4188	3.69451	3.52909	3.52909	2.64682	2.67439	4.71464
Alphaproteobacteria	0	0	0	0	0	0	0	0.027571	0.220568	0	0.027571	0		Alphaproteobacteria	0	0	0	0	0	0	0	0.0270636	0.162382	0	0.0270636	0.0270636		Alphaproteobacteria	0	0	0	0	0	0	0	0	0.171478	0	0.0285796	0.0285796		Alphaproteobacteria	0	0	0	0	0	0	0
Bacilli	22.7461	22.4152	23.7111	22.6909	21.6708	20.7334	10.9181	11.5798	9.07086	9.09843	10.5873	10.5597		Bacilli	22.2733	20.7307	23.2206	21.9215	21.1367	20.7307	10.5548	11.6373	8.49797	9.28281	10.3654	10.5277		Bacilli	21.8062	23.2638	23.6639	21.6919	20.3487	21.2918	11.2604	11.4318	8.34524	9.60274	10.7459	10.7173		Bacilli	22.7461	22.4152	23.7111	22.6909	21.6708	20.7334	10.9181
Bacteroidia	5.95533	8.87786	5.73477	7.44417	6.64461	7.71988	6.3689	8.32644	9.67742	8.82272	7.38903	8.21616		Bacteroidia	7.60487	10.3924	6.57645	9.58051	8.52503	9.36401	6.87415	8.98512	11.2314	9.58051	7.57781	8.79567		Bacteroidia	5.77308	8.88825	4.60131	7.37354	6.94484	7.88797	6.14461	8.2595	10.06	7.88797	7.1449	8.14518		Bacteroidia	5.95533	8.87786	5.73477	7.44417	6.64461	7.71988	6.3689
Betaproteobacteria	50.2068	42.3215	48.9109	44.8029	48.9385	45.7954	55.5831	52.9087	44.6926	47.5048	54.4251	52.1368		Betaproteobacteria	49.77	41.0014	48.6604	44.5196	48.931	46.7118	56.6171	52.4222	44.8173	46.0893	54.3166	51.2855		Betaproteobacteria	52.1863	43.3267	51.1575	47.0992	50.1572	47.0706	57.7594	53.9583	47.2992	49.2141	56.3304	53.7011		Betaproteobacteria	50.2068	42.3215	48.9109	44.8029	48.9385	45.7954	55.5831
Clostridia	5.81748	5.45906	5.40392	5.81748	5.18335	6.58947	5.87262	5.84505	6.72732	6.14833	6.25862	6.20347		Chloroplast	0	0	0	0	0	0	0	0	0.0270636	0	0	0		Clostridia	5.65876	5.8874	5.23007	6.37325	5.63018	5.83024	5.54444	5.57302	6.63047	5.6016	4.85853	5.83024		Clostridia	5.81748	5.45906	5.40392	5.81748	5.18335	6.58947	5.87262
Deltaproteobacteria	0	0	0.027571	0	0	0	0	0	0	0	0	0		Clostridia	5.79161	6.22463	5.30447	5.25034	5.76455	5.5751	5.79161	5.5751	6.68471	6.27876	5.52097	6.33288		Deltaproteobacteria	0	0	0.0285796	0	0	0	0	0	0	0	0	0		Deltaproteobacteria	0	0	0.027571	0	0	0	0
Epsilonproteobacteria	0.937414	1.32341	1.10284	1.35098	1.48883	1.18555	2.34353	1.92997	2.39868	2.42625	2.17811	2.59167		Deltaproteobacteria	0	0	0.0270636	0	0	0	0	0	0	0	0	0		Epsilonproteobacteria	0.857388	1.05744	0.943127	0.914547	1.31466	1.02887	2.31495	1.94341	1.91483	2.02915	1.88625	2.25779		Epsilonproteobacteria	0.937414	1.32341	1.10284	1.35098	1.48883	1.18555	2.34353
Erysipelotrichi	0.027571	0.027571	0.027571	0.027571	0	0.027571	0.137855	0	0	0.110284	0	0		Epsilonproteobacteria	0.866035	1.43437	1.08254	1.21786	1.08254	1.32612	2.65223	2.00271	2.0839	2.13802	2.24628	2.46279		Erysipelotrichi	0.0571592	0.0285796	0.0285796	0	0	0.0285796	0.0571592	0	0.0285796	0.0857388	0	0.0571592		Erysipelotrichi	0.027571	0.027571	0.027571	0.027571	0	0.027571	0.137855
Flavobacteria	0.634133	1.10284	0.578991	0.689275	0.964985	1.0477	1.37855	1.7094	1.21312	1.54398	1.29584	1.48883		Erysipelotrichi	0.0541272	0.0270636	0.0270636	0	0	0.0541272	0.108254	0	0.0270636	0	0	0.0541272		Flavobacteria	0.68591	0.943127	0.543012	0.857388	1.02887	1.02887	1.22892	1.60046	1.08602	1.42898	1.4004	1.71478		Flavobacteria	0.634133	1.10284	0.578991	0.689275	0.964985	1.0477	1.37855
Fusobacteria	4.6595	6.97546	5.73477	6.69975	5.34877	6.5619	5.18335	4.82492	12.1864	11.3041	5.12821	6.12076		Flavobacteria	0.568336	0.920162	0.568336	0.920162	0.920162	0.947226	1.21786	1.54263	1.13667	1.65088	1.38024	1.24493		Fusobacteria	3.88682	5.51586	4.82995	5.23007	3.94398	5.40154	3.80109	4.31552	12.0892	11.2032	5.14433	4.60131		Fusobacteria	4.6595	6.97546	5.73477	6.69975	5.34877	6.5619	5.18335
Gammaproteobacteria	4.13565	5.59691	3.52909	4.90764	5.48663	5.48663	3.19824	2.89495	3.06038	2.64682	2.92253	2.53653		Fusobacteria	4.81732	7.71313	5.60217	5.89986	5.16915	5.89986	4.79026	4.89851	12.1786	11.8539	5.92693	5.79161		Gammaproteobacteria	4.0583	5.51586	3.77251	5.28722	5.80166	5.94456	3.25807	3.11518	2.74364	2.57216	2.88654	3.34381		Gammaproteobacteria	4.13565	5.59691	3.52909	4.90764	5.48663	5.48663	3.19824
Mollicutes	0.303281	0.220568	0.165426	0.303281	0.385994	0.413565	0.578991	0.716846	0.578991	0.689275	0.689275	0.441136		Gammaproteobacteria	3.68065	5.16915	3.59946	4.89851	4.27605	5.06089	2.40866	2.92287	3.03112	2.54398	2.89581	2.977		Mollicutes	0.0571592	0.142898	0.0857388	0	0.142898	0.114318	0.171478	0.171478	0.114318	0.200057	0.0857388	0.200057		Mollicutes	0.303281	0.220568	0.165426	0.303281	0.385994	0.413565	0.578991
Spirochaetes	0.110284	0.27571	0.192997	0.110284	0.110284	0.192997	0.578991	0.744417	1.7094	1.32341	0.468707	0.82713		Mollicutes	0.243572	0.216509	0.162382	0.270636	0.351827	0.568336	0.433018	0.703654	0.405954	0.622463	0.487145	0.433018		Spirochaetes	0.0857388	0.314376	0.200057	0.200057	0.171478	0.171478	0.371535	0.457274	1.65762	1.08602	0.628751	0.71449		Spirochaetes	0.110284	0.27571	0.192997	0.110284	0.110284	0.192997	0.578991
Synergistia	0.137855	0.027571	0.082713	0.110284	0.110284	0.137855	0.165426	0.192997	0.385994	0.413565	0.248139	0.303281		Spirochaetes	0.0811908	0.270636	0.189445	0.135318	0.0541272	0.162382	0.433018	0.703654	1.67794	1.08254	0.541272	0.622463		Synergistia	0.142898	0.0857388	0.0857388	0.0857388	0.142898	0.142898	0.171478	0.228637	0.314376	0.457274	0.428694	0.171478		Synergistia	0.137855	0.027571	0.082713	0.110284	0.110284	0.137855	0.165426
TM7-3	0.661704	1.32341	1.07527	1.32341	0.771988	1.0477	2.50896	2.06782	2.04025	2.31596	2.26082	2.0954		Synergistia	0.0811908	0.0541272	0.0811908	0.108254	0.108254	0.0811908	0.189445	0.216509	0.433018	0.460081	0.243572	0.243572		TM7-3	0.68591	0.885967	1.00029	0.857388	0.857388	1.00029	2.34353	2.22921	2.00057	2.42927	2.14347	1.88625		TM7-3	0.661704	1.32341	1.07527	1.32341	0.771988	1.0477	2.50896
														TM7-3	0.622463	1.56969	1.05548	1.1908	0.703654	1.00135	2.51691	2.05683	2.13802	2.24628	2.13802	2.24628		unclassified	0.200057	0.285796	0.200057	0.200057	0.285796	0.200057	0.485853	0.828808	0.885967	1.28608	0.771649	0.743069
[truncated: 31 more columns]

## Sheet: Order
Pipeline 1														Pipeline 2														Pipeline 3														Pipeline 4
	E_1_1	E_1_2	E_2_1	E_2_2	E_3_1	E_3_2	M_1_1	M_1_2	M_2_1	M_2_2	M_3_1	M_3_2			E_1_1	E_1_2	E_2_1	E_2_2	E_3_1	E_3_2	M_1_1	M_1_2	M_2_1	M_2_2	M_3_1	M_3_2			E_1_1	E_1_2	E_2_1	E_2_2	E_3_1	E_3_2	M_1_1	M_1_2	M_2_1	M_2_2	M_3_1	M_3_2			E_1_1	E_1_2	E_2_1	E_2_2	E_3_1	E_3_2	M_1_1
Actinomycetales	3.4188	3.66694	3.52909	3.52909	2.61924	2.64682	4.71464	5.5142	5.04549	4.63193	5.54177	5.76234		Actinomycetales	3.32882	3.65359	3.51827	3.46414	2.6793	2.11096	4.9797	5.49391	4.57375	4.89851	5.52097	6.33288		Actinomycetales	3.85825	3.85825	3.62961	3.82967	3.20091	2.82938	5.08717	5.8874	4.65847	4.91569	5.51586	5.8874		Actinomycetales	3.4188	3.66694	3.52909	3.52909	2.61924	2.64682	4.71464
Bacillales	0.027571	0	0	0	0	0	0.027571	0	0.055142	0.082713	0	0		Bacillales	0.0270636	0.0270636	0	0	0	0	0.0270636	0	0.0270636	0.0541272	0	0.0270636		Bacillales	0.0285796	0	0	0	0	0	0.0285796	0	0.0285796	0.0857388	0.0285796	0		Bacillales	0.027571	0	0	0	0	0	0.027571
Bacteroidales	5.95533	8.87786	5.73477	7.44417	6.64461	7.71988	6.3689	8.32644	9.67742	8.82272	7.38903	8.21616		Bacteroidales	7.60487	10.3924	6.57645	9.58051	8.52503	9.36401	6.87415	8.98512	11.2314	9.58051	7.57781	8.79567		Bacteroidales	5.77308	8.88825	4.60131	7.37354	6.94484	7.88797	6.14461	8.2595	10.06	7.88797	7.1449	8.14518		Bacteroidales	5.95533	8.87786	5.73477	7.44417	6.64461	7.71988	6.3689
Burkholderiales	15.6603	12.7654	15.357	12.8205	13.5925	13.7855	33.8848	31.9548	24.097	26.22	33.0025	31.4034		Burkholderiales	15.0744	11.8539	15.0744	12.6116	14.0189	13.9648	34.9662	31.0149	24.3572	25.115	32.3951	30.5007		Burkholderiales	15.7759	12.2892	15.9188	13.9468	13.9754	13.661	35.4959	32.6951	26.8077	26.6933	33.6096	32.5522		Burkholderiales	15.6603	12.5724	15.357	12.8205	13.5925	13.7855	33.8848
Campylobacterales	0.937414	1.32341	1.10284	1.35098	1.48883	1.18555	2.34353	1.92997	2.39868	2.42625	2.17811	2.59167		Campylobacterales	0.866035	1.43437	1.08254	1.21786	1.08254	1.32612	2.65223	2.00271	2.0839	2.13802	2.24628	2.46279		Campylobacterales	0.857388	1.05744	0.943127	0.914547	1.31466	1.02887	2.31495	1.94341	1.91483	2.02915	1.88625	2.25779		Campylobacterales	0.937414	1.32341	1.10284	1.35098	1.48883	1.18555	2.34353
Clostridiales	5.81748	5.45906	5.40392	5.81748	5.18335	6.58947	5.87262	5.84505	6.72732	6.14833	6.25862	6.20347		Clostridiales	5.79161	6.22463	5.30447	5.25034	5.76455	5.5751	5.79161	5.5751	6.68471	6.27876	5.52097	6.33288		Clostridiales	5.65876	5.8874	5.23007	6.37325	5.63018	5.83024	5.54444	5.57302	6.63047	5.6016	4.85853	5.83024		Clostridiales	5.81748	5.45906	5.40392	5.81748	5.18335	6.58947	5.87262
Coriobacteriales	0	0.027571	0	0	0.027571	0.027571	0	0	0	0	0	0		Coriobacteriales	0	0	0	0	0.0541272	0	0	0	0	0	0.0270636	0		Coriobacteriales	0	0	0	0	0.0285796	0.0285796	0	0	0	0	0	0		Coriobacteriales	0	0.027571	0	0	0.027571	0.027571	0
CW040	0.248139	0.192997	0.192997	0.358423	0.055142	0.137855	0.468707	0.413565	0.303281	0.27571	0.413565	0.385994		CW040	0.243572	0.270636	0.189445	0.270636	0.0270636	0.270636	0.514208	0.37889	0.37889	0.433018	0.2977	0.37889		CW040	0.285796	0.228637	0.200057	0.257216	0.0857388	0.342955	0.371535	0.428694	0.371535	0.371535	0.457274	0.371535		CW040	0.248139	0.192997	0.192997	0.358423	0.055142	0.137855	0.468707
Desulfobacterales	0	0	0.027571	0	0	0	0	0	0	0	0	0		Desulfobacterales	0	0	0.0270636	0	0	0	0	0	0	0	0	0		Desulfobacterales	0	0	0.0285796	0	0	0	0	0	0	0	0	0		Desulfobacterales	0	0	0.027571	0	0	0	0
Erysipelotrichales	0.027571	0.027571	0.027571	0.027571	0	0.027571	0.137855	0	0	0.110284	0	0		Erysipelotrichales	0.0541272	0.0270636	0.0270636	0	0	0.0541272	0.108254	0	0.0270636	0	0	0.0541272		Erysipelotrichales	0.0571592	0.0285796	0.0285796	0	0	0.0285796	0.0571592	0	0.0285796	0.0857388	0	0.0571592		Erysipelotrichales	0.027571	0.027571	0.027571	0.027571	0	0.027571	0.137855
EW055	0.27571	0.55142	0.496278	0.744417	0.468707	0.523849	1.43369	1.32341	1.21312	1.40612	1.26827	1.13041		EW055	0.243572	0.595399	0.487145	0.622463	0.405954	0.487145	1.46143	1.29905	1.27199	1.32612	1.16373	1.24493		EW055	0.285796	0.314376	0.400114	0.514433	0.428694	0.285796	1.4004	1.45756	1.20034	1.34324	0.971706	1.05744		EW055	0.27571	0.55142	0.496278	0.744417	0.468707	0.523849	1.43369
Flavobacteriales	0.634133	1.10284	0.578991	0.689275	0.964985	1.0477	1.37855	1.7094	1.21312	1.54398	1.29584	1.48883		Flavobacteriales	0.568336	0.920162	0.568336	0.920162	0.920162	0.947226	1.21786	1.54263	1.13667	1.65088	1.38024	1.24493		Flavobacteriales	0.68591	0.943127	0.543012	0.857388	1.02887	1.02887	1.22892	1.60046	1.08602	1.42898	1.4004	1.71478		Flavobacteriales	0.634133	1.10284	0.578991	0.689275	0.964985	1.0477	1.37855
Fusobacteriales	4.6595	6.97546	5.73477	6.69975	5.34877	6.5619	5.18335	4.82492	12.1864	11.3041	5.12821	6.12076		Fusobacteriales	4.81732	7.71313	5.60217	5.89986	5.16915	5.89986	4.79026	4.89851	12.1786	11.8539	5.92693	5.79161		Fusobacteriales	3.88682	5.51586	4.82995	5.23007	3.94398	5.40154	3.80109	4.31552	12.0892	11.2032	5.14433	4.60131		Fusobacteriales	4.6595	6.97546	5.73477	6.69975	5.34877	6.5619	5.18335
Gemellales	5.21092	5.76234	5.81748	5.65205	3.19824	5.48663	0.496278	0.909843	1.15798	0.716846	0.799559	0.523849		Gemellales	4.87145	5.35859	5.76455	5.52097	3.22057	5.33153	0.541272	0.893099	0.920162	0.67659	0.67659	0.541272		Gemellales	5.00143	6.11603	5.97314	5.37296	3.20091	5.25865	0.485853	0.857388	1.00029	0.914547	0.71449	0.600171		Gemellales	5.21092	5.76234	5.81748	5.65205	3.19824	5.48663	0.496278
I025	0.110284	0.248139	0.27571	0.137855	0.110284	0.27571	0.578991	0.303281	0.496278	0.385994	0.523849	0.441136		I025	0.0811908	0.37889	0.270636	0.216509	0.135318	0.135318	0.541272	0.324763	0.37889	0.324763	0.568336	0.460081		I025	0.0857388	0.228637	0.285796	0.0571592	0.171478	0.200057	0.571592	0.314376	0.400114	0.457274	0.600171	0.342955		I025	0.110284	0.248139	0.27571	0.137855	0.110284	0.27571	0.578991
Lactobacillales	17.5076	16.6529	17.8936	17.0389	18.4726	15.2468	10.3943	10.67	7.85773	8.29887	9.7877	10.0358		Lactobacillales	17.3748	15.3451	17.456	16.3735	17.9161	15.3992	9.98647	10.7442	7.55074	8.5521	9.68877	9.9594		Lactobacillales	16.7762	17.1478	17.6908	16.3189	17.1478	16.0332	10.7459	10.5744	7.31638	8.60246	10.0029	10.1172		Lactobacillales	17.5076	16.6529	17.8936	17.0389	18.4726	15.2468	10.3943
Mycoplasmatales	0.055142	0.110284	0.082713	0.082713	0.192997	0.137855	0.137855	0.137855	0.137855	0.165426	0.220568	0.192997		Mycoplasmatales	0.0270636	0.0811908	0.0811908	0.0541272	0.216509	0.135318	0.108254	0.162382	0.0811908	0.162382	0.135318	0.162382		Mycoplasmatales	0.0571592	0.142898	0.0857388	0	0.142898	0.114318	0.171478	0.171478	0.114318	0.200057	0.0857388	0.200057		Mycoplasmatales	0.055142	0.110284	0.082713	0.082713	0.192997	0.137855	0.137855
Neisseriales	34.5465	29.3907	33.4988	31.8169	35.3184	31.9272	21.6432	20.8161	20.4577	21.1745	21.3675	20.7058		Neisseriales	34.6955	28.6062	33.3965	31.1502	34.6414	32.3681	21.5426	21.0014	20.0541	20.7037	21.7862	20.6225		Neisseriales	36.4104	31.0374	35.2386	33.1523	36.1818	33.4095	22.2635	21.2632	20.4916	22.5207	22.7208	21.1489		Neisseriales	34.5465	29.3907	33.4988	31.6791	35.3184	31.9272	21.6432
Pasteurellales	4.10808	5.56934	3.50152	4.90764	5.45906	5.43149	3.17066	2.89495	2.9501	2.59167	2.7571	2.17811		Pasteurellales	3.65359	5.14208	3.5724	4.89851	4.24899	5.03383	2.40866	2.89581	2.92287	2.51691	2.70636	2.54398		Pasteurellales	4.02972	5.51586	3.74393	5.28722	5.77308	5.91598	3.25807	3.0866	2.6579	2.48642	2.6579	3.14376		Pasteurellales	4.10808	5.56934	3.50152	4.90764	5.45906	5.43149	3.17066
Pseudomonadales	0	0	0	0	0.027571	0.027571	0	0	0.110284	0	0	0.082713		Pseudomonadales	0	0	0	0	0.0270636	0	0	0	0.0811908	0	0	0.0811908		Pseudomonadales	0	0	0	0	0.0285796	0.0285796	0	0	0.0571592	0.0285796	0.0285796	0		Pseudomonadales	0	0	0	0	0.027571	0.027571	0
RF39	0.248139	0.110284	0.082713	0.220568	0.192997	0.27571	0.441136	0.578991	0.441136	0.523849	0.468707	0.248139		RF39	0.216509	0.135318	0.0811908	0.216509	0.135318	0.433018	0.324763	0.541272	0.324763	0.460081	0.351827	0.270636		Rhizobiales	0	0	0	0	0	0	0	0	0	0	0.0285796	0		RF39	0.248139	0.110284	0.082713	0.220568	0.192997	0.27571	0.441136
Rhizobiales	0	0	0	0	0	0	0	0	0	0	0.027571	0		Rhizobiales	0	0	0	0	0	0	0	0	0	0	0.0270636	0		Rhodobacterales	0	0	0	0	0	0	0	0	0.142898	0	0	0.0285796		Rhizobiales	0	0	0	0	0	0	0
Rhodobacterales	0	0	0	0	0	0	0	0.027571	0.192997	0	0	0		Rhodobacterales	0	0	0	0	0	0	0	0.0270636	0.135318	0	0	0.0270636		Rhodospirillales	0	0	0	0	0	0	0	0	0.0285796	0	0	0		Rhodobacterales	0	0	0	0	0	0	0
Rhodospirillales	0	0	0	0	0	0	0	0	0.027571	0	0	0		Rhodospirillales	0	0	0	0	0	0	0	0	0.0270636	0	0	0		Spirochaetales	0.0857388	0.314376	0.200057	0.200057	0.171478	0.171478	0.371535	0.457274	1.65762	1.08602	0.628751	0.71449		Rhodospirillales	0	0	0	0	0	0	0
Spirochaetales	0.110284	0.27571	0.192997	0.110284	0.110284	0.192997	0.578991	0.744417	1.7094	1.32341	0.468707	0.82713		Spirochaetales	0.0811908	0.270636	0.189445	0.135318	0.0541272	0.162382	0.433018	0.703654	1.67794	1.08254	0.541272	0.622463		Synergistales	0.142898	0.0857388	0.0857388	0.0857388	0.142898	0.142898	0.171478	0.228637	0.314376	0.457274	0.428694	0.171478		Spirochaetales	0.110284	0.27571	0.192997	0.110284	0.110284	0.192997	0.578991
Synergistales	0.137855	0.027571	0.082713	0.110284	0.110284	0.137855	0.165426	0.192997	0.385994	0.413565	0.248139	0.303281		Streptophyta	0	0	0	0	0	0	0	0	0.0270636	0	0	0		unclassified	0.228637	0.400114	0.314376	0.228637	0.457274	0.371535	0.485853	0.857388	0.914547	1.5433	0.885967	0.857388		Synergistales	0.137855	0.027571	0.082713	0.110284	0.110284	0.137855	0.165426
Vibrionales	0.027571	0.027571	0.027571	0	0	0.027571	0.027571	0	0	0.055142	0.165426	0.27571		Synergistales	0.0811908	0.0541272	0.0811908	0.108254	0.108254	0.0811908	0.189445	0.216509	0.433018	0.460081	0.243572	0.243572		Vibrionales	0.0285796	0	0.0285796	0	0	0	0	0.0285796	0	0.0571592	0.200057	0.200057		Vibrionales	0.027571	0.027571	0.027571	0	0	0.027571	0.027571
														Vibrionales	0.0270636	0.0270636	0.0270636	0	0	0.0270636	0	0.0270636	0	0.0270636	0.189445	0.351827		Xanthomonadales	0	0	0	0	0	0	0	0	0.0285796	0	0	0
[truncated: 31 more columns]

## Sheet: Family
Pipeline 1														Pipeline 2														Pipeline 3														Pipeline 4
	E_1_1	E_1_2	E_2_1	E_2_2	E_3_1	E_3_2	M_1_1	M_1_2	M_2_1	M_2_2	M_3_1	M_3_2			E_1_1	E_1_2	E_2_1	E_2_2	E_3_1	E_3_2	M_1_1	M_1_2	M_2_1	M_2_2	M_3_1	M_3_2			E_1_1	E_1_2	E_2_1	E_2_2	E_3_1	E_3_2	M_1_1	M_1_2	M_2_1	M_2_2	M_3_1	M_3_2			E_1_1	E_1_2	E_2_1	E_2_2	E_3_1	E_3_2	M_1_1
Actinomycetaceae	0.055142	0.027571	0	0	0	0	0.027571	0	0.055142	0.027571	0	0		Actinomycetaceae	0.0541272	0	0	0	0	0	0.0270636	0	0.0270636	0.0541272	0.0270636	0		Actinomycetaceae	0.0571592	0.0285796	0	0	0	0	0	0	0	0.0571592	0.0285796	0		Actinomycetaceae	0.055142	0.027571	0	0	0	0	0.027571
Aerococcaceae	0.27571	0.220568	0.468707	0.220568	0.220568	0.110284	0.027571	0.055142	0.055142	0.082713	0.055142	0.027571		Aerococcaceae	0.324763	0.216509	0.460081	0.162382	0.243572	0.189445	0.0811908	0.0270636	0.0541272	0.0541272	0.0270636	0.0811908		Aerococcaceae	0.314376	0.114318	0.485853	0.0857388	0.285796	0.114318	0.0857388	0.0571592	0.0285796	0.114318	0.0857388	0		Aerococcaceae	0.27571	0.220568	0.468707	0.220568	0.220568	0.110284	0.027571
Bacillaceae	0.027571	0	0	0	0	0	0	0	0	0	0	0		Bacillaceae	0.0270636	0	0	0	0	0	0	0	0	0	0	0		Bacillaceae	0.0285796	0	0	0	0	0	0	0	0	0	0	0		Bacillaceae	0.027571	0	0	0	0	0	0
Burkholderiaceae	15.6052	12.7102	15.3019	12.7654	13.5649	13.7028	33.8296	31.8996	23.9592	26.0822	32.8922	31.2655		Burkholderiaceae	15.0474	11.8268	15.0203	12.6116	13.9378	13.9378	34.7767	30.9337	24.249	24.9256	32.2598	30.2842		Burkholderiaceae	15.7188	12.2606	15.8617	13.9468	13.8611	13.5753	35.4101	32.6093	26.7505	26.6648	33.4953	32.4093		Burkholderiaceae	15.6052	12.5172	15.3019	12.7654	13.5649	13.7028	33.8296
Campylobacteraceae	0.937414	1.32341	1.10284	1.35098	1.48883	1.18555	2.34353	1.92997	2.39868	2.42625	2.17811	2.59167		Campylobacteraceae	0.866035	1.43437	1.08254	1.21786	1.08254	1.32612	2.65223	2.00271	2.0839	2.13802	2.24628	2.46279		Campylobacteraceae	0.857388	1.05744	0.943127	0.914547	1.31466	1.02887	2.31495	1.94341	1.91483	2.02915	1.88625	2.25779		Campylobacteraceae	0.937414	1.32341	1.10284	1.35098	1.48883	1.18555	2.34353
Carnobacteriaceae	0.55142	0.523849	0.496278	0.330852	0.27571	0.330852	0.110284	0.137855	0.055142	0.110284	0.055142	0.055142		Carnobacteriaceae	0.541272	0.433018	0.487145	0.405954	0.216509	0.324763	0.0541272	0.108254	0.108254	0.162382	0.0811908	0.0811908		Carnobacteriaceae	0.571592	0.428694	0.514433	0.371535	0.171478	0.314376	0.114318	0.114318	0.0571592	0.142898	0.142898	0.171478		Carnobacteriaceae	0.55142	0.523849	0.496278	0.330852	0.27571	0.330852	0.110284
Catabacteriaceae	0.027571	0.027571	0	0	0.027571	0	0	0.027571	0	0.082713	0.082713	0.055142		Catabacteriaceae	0.0270636	0.0270636	0	0	0.0270636	0	0	0	0.0541272	0.0811908	0.0541272	0.0270636		Catabacteriaceae	0.0285796	0	0	0	0.0285796	0	0.0285796	0.0285796	0.0571592	0.0285796	0.0571592	0.0857388		Catabacteriaceae	0.027571	0.027571	0	0	0.027571	0	0
ClostridialesFamilyXIII.IncertaeSedis	0.082713	0.110284	0.055142	0.110284	0.055142	0.137855	0.192997	0.082713	0.248139	0.165426	0.192997	0.27571		ClostridialesFamilyXIII.IncertaeSedis	0.135318	0.216509	0.0541272	0.0270636	0.162382	0.0811908	0.162382	0.0811908	0.135318	0.135318	0.162382	0.189445		ClostridialesFamilyXIII.IncertaeSedis	0.114318	0.142898	0.0571592	0.0857388	0.171478	0.171478	0.200057	0.0857388	0.257216	0.142898	0.314376	0.200057		ClostridialesFamilyXIII.IncertaeSedis	0.082713	0.110284	0.055142	0.110284	0.055142	0.137855	0.192997
Comamonadaceae	0.055142	0.055142	0.055142	0.055142	0.027571	0.055142	0.055142	0.055142	0.137855	0.137855	0.110284	0.137855		Comamonadaceae	0.0270636	0.0270636	0.0541272	0	0.0811908	0.0270636	0.189445	0.0811908	0.0811908	0.162382	0.108254	0.216509		Comamonadaceae	0.0571592	0.0285796	0.0571592	0	0.114318	0.0857388	0.0857388	0.0857388	0.0571592	0.0285796	0.114318	0.142898		Comamonadaceae	0.055142	0.055142	0.055142	0.055142	0.027571	0.055142	0.055142
Coriobacteriaceae	0	0.027571	0	0	0.027571	0.027571	0	0	0	0	0	0		Coriobacteriaceae	0	0	0	0	0.0541272	0	0	0	0	0	0.0270636	0		Coriobacteriaceae	0	0	0	0	0.0285796	0.0285796	0	0	0	0	0	0		Coriobacteriaceae	0	0.027571	0	0	0.027571	0.027571	0
Corynebacteriaceae	0.055142	0.055142	0.055142	0.027571	0.137855	0.082713	0.248139	0.330852	0.248139	0.192997	0.27571	0.27571		Corynebacteriaceae	0.0541272	0.0541272	0.0541272	0	0.0541272	0.0270636	0.189445	0.324763	0.135318	0.216509	0.351827	0.189445		Corynebacteriaceae	0.0571592	0.0571592	0.0571592	0.0285796	0.0857388	0.0857388	0.228637	0.342955	0.114318	0.257216	0.200057	0.257216		Corynebacteriaceae	0.055142	0.055142	0.055142	0.027571	0.137855	0.082713	0.248139
Desulfobulbaceae	0	0	0.027571	0	0	0	0	0	0	0	0	0		Desulfobulbaceae	0	0	0.0270636	0	0	0	0	0	0	0	0	0		Desulfobulbaceae	0	0	0.0285796	0	0	0	0	0	0	0	0	0		Desulfobulbaceae	0	0	0.027571	0	0	0	0
Dethiosulfovibrionaceae	0.137855	0.027571	0.082713	0.110284	0.110284	0.137855	0.165426	0.192997	0.385994	0.413565	0.248139	0.303281		Dethiosulfovibrionaceae	0.0811908	0.0541272	0.0811908	0.108254	0.108254	0.0811908	0.189445	0.216509	0.433018	0.460081	0.243572	0.243572		Dethiosulfovibrionaceae	0.142898	0.0857388	0.0857388	0.0857388	0.142898	0.142898	0.171478	0.228637	0.314376	0.457274	0.428694	0.171478		Dethiosulfovibrionaceae	0.137855	0.027571	0.082713	0.110284	0.110284	0.137855	0.165426
Erysipelotrichaceae	0.027571	0.027571	0.027571	0.027571	0	0.027571	0.137855	0	0	0.110284	0	0		Erysipelotrichaceae	0.0541272	0.0270636	0.0270636	0	0	0.0541272	0.108254	0	0.0270636	0	0	0.0541272		Erysipelotrichaceae	0.0571592	0.0285796	0.0285796	0	0	0.0285796	0.0571592	0	0.0285796	0.0857388	0	0.0571592		Erysipelotrichaceae	0.027571	0.027571	0.027571	0.027571	0	0.027571	0.137855
Eubacteriaceae	0.27571	0.082713	0.137855	0.110284	0.165426	0.082713	0.413565	0.385994	0.248139	0.330852	0.248139	0.358423		Eubacteriaceae	0.243572	0.135318	0.135318	0.108254	0.162382	0.108254	0.405954	0.351827	0.351827	0.243572	0.243572	0.37889		Eubacteriaceae	0.228637	0.0857388	0.0857388	0.171478	0.0857388	0	0.285796	0.285796	0.171478	0.200057	0.371535	0.285796		Eubacteriaceae	0.27571	0.082713	0.137855	0.110284	0.165426	0.082713	0.413565
F16	0.248139	0.192997	0.192997	0.358423	0.055142	0.137855	0.468707	0.413565	0.303281	0.27571	0.413565	0.385994		F16	0.243572	0.270636	0.189445	0.270636	0.0270636	0.270636	0.514208	0.37889	0.37889	0.433018	0.2977	0.37889		F16	0.285796	0.228637	0.200057	0.257216	0.0857388	0.342955	0.371535	0.428694	0.371535	0.371535	0.457274	0.371535		F16	0.248139	0.192997	0.192997	0.358423	0.055142	0.137855	0.468707
Flavobacteriaceae	0.634133	1.10284	0.578991	0.689275	0.964985	1.0477	1.37855	1.7094	1.21312	1.54398	1.29584	1.48883		Flavobacteriaceae	0.568336	0.920162	0.568336	0.920162	0.920162	0.947226	1.21786	1.54263	1.13667	1.65088	1.38024	1.24493		Flavobacteriaceae	0.68591	0.943127	0.543012	0.857388	1.02887	1.02887	1.22892	1.60046	1.08602	1.42898	1.4004	1.71478		Flavobacteriaceae	0.634133	1.10284	0.578991	0.689275	0.964985	1.0477	1.37855
Fusobacteriaceae	4.6595	6.97546	5.73477	6.69975	5.34877	6.5619	5.18335	4.82492	12.1864	11.3041	5.12821	6.12076		Fusobacteriaceae	4.81732	7.71313	5.60217	5.89986	5.16915	5.89986	4.79026	4.89851	12.1786	11.8539	5.92693	5.79161		Fusobacteriaceae	3.88682	5.51586	4.82995	5.23007	3.94398	5.40154	3.80109	4.31552	12.0892	11.2032	5.14433	4.60131		Fusobacteriaceae	4.6595	6.97546	5.73477	6.69975	5.34877	6.5619	5.18335
Gemellaceae	5.21092	5.76234	5.81748	5.65205	3.19824	5.48663	0.496278	0.909843	1.15798	0.716846	0.799559	0.523849		Gemellaceae	4.87145	5.35859	5.76455	5.52097	3.22057	5.33153	0.541272	0.893099	0.920162	0.67659	0.67659	0.541272		Gemellaceae	5.00143	6.11603	5.97314	5.37296	3.20091	5.25865	0.485853	0.857388	1.00029	0.914547	0.71449	0.600171		Gemellaceae	5.21092	5.76234	5.81748	5.65205	3.19824	5.48663	0.496278
Gordoniaceae	0	0	0	0	0	0	0	0	0.082713	0	0	0		Gordoniaceae	0	0	0	0	0	0	0	0	0.0811908	0	0	0		Gordoniaceae	0	0	0	0	0	0	0	0	0.0571592	0	0	0		Gordoniaceae	0	0	0	0	0	0	0
Lachnospiraceae	2.97767	2.37111	2.42625	2.67439	2.53653	3.00524	3.22581	3.47395	3.63937	3.72208	3.8048	3.8048		Lachnospiraceae	3.03112	2.51691	2.3816	2.54398	2.54398	2.30041	3.16644	3.46414	3.59946	3.81597	3.22057	3.7889		Lachnospiraceae	2.88654	2.40069	2.34353	3.05802	2.74364	2.54358	3.22949	3.51529	3.71535	3.62961	2.85796	3.34381		Lachnospiraceae	2.97767	2.37111	2.42625	2.67439	2.53653	3.00524	3.22581
Lactobacillaceae	0.413565	0.330852	0.496278	0.27571	0.220568	0.220568	0.468707	0.468707	0.165426	0.165426	0.578991	0.634133		Lactobacillaceae	0.460081	0.2977	0.487145	0.189445	0.270636	0.270636	0.433018	0.487145	0.243572	0.216509	0.324763	0.703654		Lactobacillaceae	0.514433	0.400114	0.514433	0.285796	0.428694	0.171478	0.628751	0.485853	0.228637	0.314376	0.571592	0.657331		Lactobacillaceae	0.413565	0.330852	0.496278	0.27571	0.220568	0.220568	0.468707
Leuconostocaceae	0	0	0.027571	0	0	0	0	0	0	0	0	0		Leuconostocaceae	0	0	0.0270636	0	0	0	0	0	0	0	0	0		Leuconostocaceae	0	0	0.0285796	0.0285796	0	0	0	0	0	0	0	0		Leuconostocaceae	0	0	0.027571	0	0	0	0
Methylobacteriaceae	0	0	0	0	0	0	0	0	0	0	0.027571	0		Methylobacteriaceae	0	0	0	0	0	0	0	0	0	0	0.0270636	0		Listeriaceae	0	0	0	0	0	0	0	0	0	0	0.0285796	0		Methylobacteriaceae	0	0	0	0	0	0	0
Micrococcaceae	3.25338	3.58423	3.47395	3.47395	2.48139	2.5641	4.30108	5.10063	4.57679	4.35622	5.07306	5.45906		Microbacteriaceae	0	0	0	0	0	0	0	0	0.0541272	0	0	0		Methylobacteriaceae	0	0	0	0	0	0	0	0	0	0	0.0285796	0		Micrococcaceae	3.25338	3.58423	3.47395	3.47395	2.48139	2.5641	4.30108
Moraxellaceae	0	0	0	0	0.027571	0.027571	0	0	0.082713	0	0	0		Micrococcaceae	3.16644	3.5724	3.46414	3.38295	2.62517	2.0839	4.57375	5.08796	4.16779	4.57375	5.03383	6.06225		Micrococcaceae	3.68677	3.74393	3.57245	3.77251	3.11518	2.74364	4.74421	5.4587	4.42984	4.57274	5.11575	5.51586		Moraxellaceae	0	0	0	0	0.027571	0.027571	0
Mycoplasmataceae	0.055142	0.110284	0.082713	0.082713	0.192997	0.137855	0.137855	0.137855	0.137855	0.165426	0.220568	0.192997		Moraxellaceae	0	0	0	0	0.0270636	0	0	0	0.0811908	0	0	0		Moraxellaceae	0	0	0	0	0.0285796	0.0285796	0	0	0.0285796	0.0285796	0.0285796	0		Mycoplasmataceae	0.055142	0.110284	0.082713	0.082713	0.192997	0.137855	0.137855
Neisseriaceae	34.5465	29.3907	33.4988	31.8169	35.3184	31.9272	21.6432	20.8161	20.4577	21.1745	21.3675	20.7058		Mycoplasmataceae	0.0270636	0.0811908	0.0811908	0.0541272	0.216509	0.135318	0.108254	0.162382	0.0811908	0.162382	0.135318	0.162382		Mycoplasmataceae	0.0571592	0.142898	0.0857388	0	0.142898	0.114318	0.171478	0.171478	0.114318	0.200057	0.0857388	0.200057		Neisseriaceae	34.5465	29.3907	33.4988	31.6791	35.3184	31.9272	21.6432
Pasteurellaceae	4.10808	5.56934	3.50152	4.90764	5.45906	5.43149	3.17066	2.89495	2.9501	2.59167	2.7571	2.17811		Neisseriaceae	34.6955	28.6062	33.3965	31.1502	34.6414	32.3681	21.5426	21.0014	20.0541	20.7037	21.7862	20.6225		Neisseriaceae	36.4104	31.0374	35.2386	33.1523	36.1818	33.4095	22.2635	21.2632	20.4916	22.5207	22.7208	21.1489		Pasteurellaceae	4.10808	5.56934	3.50152	4.90764	5.45906	5.43149	3.17066
Peptococcaceae	0.220568	0.220568	0.137855	0.192997	0.082713	0.055142	0.027571	0.055142	0.110284	0.027571	0.027571	0.055142		Pasteurellaceae	3.65359	5.14208	3.5724	4.89851	4.24899	5.03383	2.40866	2.89581	2.92287	2.51691	2.70636	2.54398		Pasteurellaceae	4.02972	5.51586	3.74393	5.28722	5.77308	5.91598	3.25807	3.0866	2.6579	2.48642	2.6579	3.14376		Peptococcaceae	0.220568	0.220568	0.137855	0.192997	0.082713	0.055142	0.027571
Peptostreptococcaceae	0.634133	0.330852	0.578991	0.55142	0.441136	0.689275	0.110284	0.248139	0.110284	0.192997	0.192997	0.165426		Peptococcaceae	0.162382	0.135318	0.135318	0.135318	0.0541272	0.0811908	0.0270636	0.0541272	0.0270636	0.0541272	0.0270636	0.0270636		Peptococcaceae	0.200057	0.371535	0.142898	0.142898	0.0857388	0.142898	0	0.0571592	0.0857388	0.0857388	0.0285796	0		Peptostreptococcaceae	0.634133	0.330852	0.578991	0.55142	0.441136	0.689275	0.110284
Porphyromonadaceae	0.248139	0.496278	1.24069	0.771988	0.303281	0.744417	0.55142	0.441136	1.95754	1.10284	1.0477	0.578991		Peptostreptococcaceae	0.67659	0.568336	0.568336	0.595399	0.622463	0.649526	0.108254	0.216509	0.135318	0.324763	0.216509	0.243572		Peptostreptococcaceae	0.743069	0.657331	0.600171	0.800229	0.457274	0.68591	0.114318	0.257216	0.0857388	0.142898	0.142898	0.171478		Porphyromonadaceae	0.248139	0.496278	1.24069	0.771988	0.303281	0.744417	0.55142
Prevotellaceae	5.7072	8.38158	4.49407	6.67218	6.34133	6.97546	5.81748	7.8853	7.71988	7.71988	6.34133	7.63717		Porphyromonadaceae	1.75913	2.27334	2.16509	2.94993	2.3816	2.46279	1.35318	1.56969	3.03112	2.24628	1.29905	1.81326		Porphyromonadaceae	0.114318	0.628751	0.200057	0.628751	0.371535	0.68591	0.285796	0.314376	2.05773	0.971706	0.600171	0.514433		Prevotellaceae	5.7072	8.38158	4.49407	6.67218	6.34133	6.97546	5.81748
Propionibacteriaceae	0.055142	0	0	0.027571	0	0	0.137855	0.082713	0.082713	0.055142	0.192997	0.027571		Prevotellaceae	5.84574	8.11908	4.41137	6.63058	6.14344	6.90122	5.52097	7.38836	8.17321	7.33424	6.27876	6.98241		Prevotellaceae	5.65876	8.2595	4.40126	6.74478	6.57331	7.20206	5.85882	7.94513	8.00229	6.91626	6.54473	7.63075		Propionibacteriaceae	0.055142	0	0	0.027571	0	0	0.137855
Pseudomonadaceae	0	0	0	0	0	0	0	0	0.027571	0	0	0.082713		Propionibacteriaceae	0.0541272	0.0270636	0	0.0811908	0	0	0.189445	0.0811908	0.108254	0.0541272	0.108254	0.0811908		Propionibacteriaceae	0.0571592	0.0285796	0	0.0285796	0	0	0.114318	0.0857388	0.0571592	0.0285796	0.171478	0.114318		Pseudomonadaceae	0	0	0	0	0	0	0
Rhodobacteraceae	0	0	0	0	0	0	0	0.027571	0.192997	0	0	0		Pseudomonadaceae	0	0	0	0	0	0	0	0	0	0	0	0.0811908		Pseudomonadaceae	0	0	0	0	0	0	0	0	0.0285796	0	0	0		Rhodobacteraceae	0	0	0	0	0	0	0
Rhodospirillaceae	0	0	0	0	0	0	0	0	0.027571	0	0	0		Rhodobacteraceae	0	0	0	0	0	0	0	0.0270636	0.135318	0	0	0.0270636		Rhodobacteraceae	0	0	0	0	0	0	0	0	0.142898	0	0	0.0285796		Rhodospirillaceae	0	0	0	0	0	0	0
Rs-045	0.110284	0.248139	0.27571	0.137855	0.110284	0.27571	0.578991	0.303281	0.496278	0.385994	0.523849	0.441136		Rhodospirillaceae	0	0	0	0	0	0	0	0	0.0270636	0	0	0		Rhodospirillaceae	0	0	0	0	0	0	0	0	0.0285796	0	0	0		Rs-045	0.110284	0.248139	0.27571	0.137855	0.110284	0.27571	0.578991
Spirochaetaceae	0.110284	0.27571	0.192997	0.110284	0.110284	0.192997	0.578991	0.744417	1.7094	1.32341	0.468707	0.82713		Rs-045	0.0811908	0.37889	0.270636	0.216509	0.135318	0.135318	0.541272	0.324763	0.37889	0.324763	0.568336	0.460081		Rs-045	0.0857388	0.228637	0.285796	0.0571592	0.171478	0.200057	0.571592	0.314376	0.400114	0.457274	0.600171	0.342955		Spirochaetaceae	0.110284	0.27571	0.192997	0.110284	0.110284	0.192997	0.578991
Staphylococcaceae	0	0	0	0	0	0	0.027571	0	0.055142	0.082713	0	0		Spirochaetaceae	0.0811908	0.270636	0.189445	0.135318	0.0541272	0.162382	0.433018	0.703654	1.67794	1.08254	0.541272	0.622463		Spirochaetaceae	0.0857388	0.314376	0.200057	0.200057	0.171478	0.171478	0.371535	0.457274	1.65762	1.08602	0.628751	0.71449		Staphylococcaceae	0	0	0	0	0	0	0.027571
Streptococcaceae	16.2669	15.5776	16.4047	16.2117	17.7557	14.5851	9.7877	10.0083	7.58202	7.94045	9.09843	9.319		Staphylococcaceae	0	0.0270636	0	0	0	0	0.0270636	0	0.0270636	0.0541272	0	0.0270636		Staphylococcaceae	0	0	0	0	0	0	0.0285796	0	0.0285796	0.0857388	0	0		Streptococcaceae	16.2669	15.5776	16.4047	16.2117	17.7557	14.5851	9.7877
Veillonellaceae	1.26827	2.01268	1.76454	1.81969	1.73697	2.0954	1.54398	1.15798	1.54398	1.10284	1.10284	1.02013		Streptococcaceae	16.0487	14.3978	15.9946	15.6157	17.1854	14.5873	9.41813	10.1218	7.14479	8.11908	9.25575	9.09337		Streptococcaceae	15.3758	16.2046	16.1475	15.5473	16.2618	15.433	9.91712	9.91712	7.002	8.03087	9.20263	9.28837		Veillonellaceae	1.26827	2.01268	1.76454	1.81969	1.73697	2.0954	1.54398
Vibrionaceae	0.027571	0.027571	0.027571	0	0	0.027571	0.027571	0	0	0.055142	0.165426	0.27571		Veillonellaceae	1.27199	2.21922	1.73207	1.62382	1.97564	1.86739	1.62382	1.02842	1.4885	1.10961	1.10961	1.16373		unclassified	0.628751	1.00029	0.885967	1.1146	0.971706	0.943127	1.97199	2.62932	2.82938	3.20091	2.11489	2.37211		Vibrionaceae	0.027571	0.027571	0.027571	0	0	0.027571	0.027571
														Vibrionaceae	0.0270636	0.0270636	0.0270636	0	0	0.0270636	0	0.0270636	0	0.0270636	0.189445	0.351827		Veillonellaceae	1.34324	1.94341	1.82909	1.74336	1.97199	2.00057	1.60046	1.02887	1.5433	1.05744	0.828808	1.28608
														Xanthomonadaceae	0	0	0	0	0	0	0	0	0.0270636	0	0	0		Vibrionaceae	0.0285796	0	0.0285796	0	0	0	0	0.0285796	0	0.0571592	0.200057	0.200057
																												Xanthomonadaceae	0	0	0	0	0	0	0	0	0.0285796	0	0	0
[truncated: 31 more columns]

## Sheet: Genus
Pipeline 1														Pipeline 2														Pipeline 3														Pipeline 4
	E_1_1	E_1_2	E_2_1	E_2_2	E_3_1	E_3_2	M_1_1	M_1_2	M_2_1	M_2_2	M_3_1	M_3_2			E_1_1	E_1_2	E_2_1	E_2_2	E_3_1	E_3_2	M_1_1	M_1_2	M_2_1	M_2_2	M_3_1	M_3_2			E_1_1	E_1_2	E_2_1	E_2_2	E_3_1	E_3_2	M_1_1	M_1_2	M_2_1	M_2_2	M_3_1	M_3_2			E_1_1	E_1_2	E_2_1	E_2_2	E_3_1	E_3_2	M_1_1
Abiotrophia	0.27571	0.220568	0.468707	0.220568	0.220568	0.110284	0.027571	0.055142	0.055142	0.082713	0.055142	0.027571		Abiotrophia	0.324763	0.216509	0.460081	0.162382	0.243572	0.189445	0.0811908	0.0270636	0.0541272	0.0541272	0.0270636	0.0811908		Abiotrophia	0.314376	0.114318	0.485853	0.0857388	0.285796	0.114318	0.0857388	0.0571592	0.0285796	0.114318	0.0857388	0		Abiotrophia	0.27571	0.220568	0.468707	0.220568	0.220568	0.110284	0.027571
Acinetobacter	0	0	0	0	0	0	0	0	0.055142	0	0	0		Acinetobacter	0	0	0	0	0	0	0	0	0.0541272	0	0	0		Acinetobacter	0	0	0	0	0	0	0	0	0.0285796	0	0	0		Acinetobacter	0	0	0	0	0	0	0
Actinobacillus	0.27571	0.27571	0.220568	0.082713	0.220568	0.110284	0.027571	0.082713	0	0	0.027571	0		Actinobacillus	0.216509	0.216509	0.216509	0.135318	0.216509	0.135318	0.0270636	0.0541272	0.0270636	0	0.0811908	0		Actinobacillus	0.228637	0.200057	0.228637	0.171478	0.200057	0.228637	0.0571592	0.0857388	0	0	0	0		Actinobacillus	0.27571	0.27571	0.220568	0.082713	0.220568	0.110284	0.027571
Actinomyces	0.055142	0.027571	0	0	0	0	0.027571	0	0.055142	0.027571	0	0		Actinomyces	0.0541272	0	0	0	0	0	0.0270636	0	0.0270636	0.0541272	0.0270636	0		Actinomyces	0.0571592	0.0285796	0	0	0	0	0	0	0	0.0571592	0.0285796	0		Actinomyces	0.055142	0.027571	0	0	0	0	0.027571
Aggregatibacter	0.055142	0.165426	0.082713	0.082713	0.055142	0.055142	0.303281	0.27571	0.137855	0.248139	0.137855	0.110284		Aggregatibacter	0.0541272	0.270636	0.216509	0.0811908	0.216509	0.108254	0.324763	0.351827	0.189445	0.243572	0.351827	0.189445		Aggregatibacter	0.0571592	0.114318	0.200057	0.0571592	0.171478	0.114318	0.314376	0.400114	0.257216	0.257216	0.314376	0.314376		Aggregatibacter	0.082713	0.220568	0.082713	0.082713	0.082713	0.055142	0.330852
Anaeroglobus	0	0	0.082713	0	0	0	0	0	0	0	0	0		Anaeroglobus	0	0	0.0811908	0	0	0.0270636	0	0	0	0	0	0		Anaeroglobus	0	0.0571592	0.0857388	0	0	0	0	0	0	0	0	0		Anaeroglobus	0	0	0.082713	0	0	0	0
Atopobium	0	0.027571	0	0	0.027571	0.027571	0	0	0	0	0	0		Atopobium	0	0	0	0	0.0541272	0	0	0	0	0	0.0270636	0		Atopobium	0	0	0	0	0.0285796	0.0285796	0	0	0	0	0	0		Atopobium	0	0.027571	0	0	0.027571	0.027571	0
Bulleidia	0.027571	0.027571	0.027571	0.027571	0	0.027571	0.110284	0	0	0.110284	0	0		Bulleidia	0.0541272	0.0270636	0.0270636	0	0	0.0541272	0.0541272	0	0.0270636	0	0	0.0541272		Brochothrix	0	0	0	0	0	0	0	0	0	0	0.0285796	0		Bulleidia	0.027571	0.027571	0.027571	0.027571	0	0.027571	0.110284
Campylobacter	0.937414	1.32341	1.10284	1.35098	1.48883	1.18555	2.34353	1.92997	2.39868	2.42625	2.17811	2.59167		Campylobacter	0.866035	1.43437	1.08254	1.21786	1.08254	1.32612	2.65223	2.00271	2.0839	2.13802	2.24628	2.46279		Bulleidia	0.0571592	0.0285796	0.0285796	0	0	0.0285796	0.0285796	0	0.0285796	0.0857388	0	0.0571592		Campylobacter	0.937414	1.32341	1.10284	1.35098	1.48883	1.18555	2.34353
Capnocytophaga	0.441136	0.937414	0.413565	0.55142	0.771988	0.882272	1.26827	1.37855	1.0477	1.13041	1.10284	1.13041		Capnocytophaga	0.324763	0.703654	0.405954	0.757781	0.649526	0.730717	1.02842	1.1908	1.00135	1.32612	1.13667	1.05548		Campylobacter	0.857388	1.05744	0.943127	0.914547	1.31466	1.02887	2.31495	1.94341	1.91483	2.02915	1.88625	2.25779		Capnocytophaga	0.441136	0.937414	0.413565	0.55142	0.771988	0.882272	1.26827
Catonella	1.79211	1.57155	1.54398	1.81969	1.76454	1.81969	2.61924	2.86738	2.81224	3.19824	3.22581	3.11552		Catonella	1.75913	1.51556	1.51556	1.59675	1.59675	1.46143	2.48985	2.92287	2.86874	3.22057	2.6793	3.00406		Capnocytophaga	0.457274	0.771649	0.371535	0.68591	0.828808	0.800229	1.02887	1.22892	1.00029	1.05744	1.20034	1.48614		Catonella	1.79211	1.57155	1.54398	1.81969	1.76454	1.81969	2.61924
Clostridium	0.082713	0.055142	0.165426	0.110284	0.137855	0.220568	0.220568	0.055142	0.358423	0.165426	0.248139	0.192997		Clostridium	0.0541272	0.216509	0.162382	0.189445	0.243572	0.216509	0.216509	0.0541272	0.216509	0.189445	0.216509	0.243572		Catonella	1.65762	1.6862	1.60046	2.11489	1.94341	1.57188	2.71506	3.02944	3.14376	3.20091	2.42927	2.88654		Clostridium	0.082713	0.055142	0.165426	0.110284	0.137855	0.220568	0.220568
Corynebacterium	0.055142	0.055142	0.055142	0.027571	0.137855	0.082713	0.248139	0.330852	0.248139	0.192997	0.27571	0.27571		Corynebacterium	0.0541272	0.0541272	0.0541272	0	0.0541272	0.0270636	0.189445	0.324763	0.135318	0.216509	0.351827	0.189445		Chryseobacterium	0.228637	0.171478	0.171478	0.171478	0.200057	0.171478	0.171478	0.371535	0.0571592	0.342955	0.200057	0.228637		Corynebacterium	0.055142	0.055142	0.055142	0.027571	0.137855	0.082713	0.248139
Desulfobulbus	0	0	0.027571	0	0	0	0	0	0	0	0	0		Desulfobulbus	0	0	0.0270636	0	0	0	0	0	0	0	0	0		Clostridium	0	0	0	0	0	0	0.0571592	0	0.0285796	0	0	0.0285796		Desulfobulbus	0	0	0.027571	0	0	0	0
Dialister	0.055142	0.137855	0.027571	0.082713	0.110284	0.055142	0.055142	0.027571	0.027571	0.027571	0.027571	0.027571		Dialister	0.0541272	0.189445	0.0270636	0.0811908	0.108254	0.0541272	0.108254	0.0270636	0.0270636	0.0541272	0.0270636	0.0270636		Corynebacterium	0.0571592	0.0571592	0.0571592	0.0285796	0.0857388	0.0857388	0.228637	0.342955	0.114318	0.257216	0.200057	0.257216		Dialister	0.055142	0.137855	0.027571	0.082713	0.110284	0.055142	0.055142
Eikenella	0.055142	0.055142	0.055142	0	0.055142	0	0.055142	0	0.055142	0.027571	0.055142	0.027571		Eikenella	0.0541272	0.0270636	0.0541272	0.0811908	0.0541272	0	0.0541272	0	0.0270636	0.0541272	0.0541272	0.0270636		Desulfobulbus	0	0	0.0285796	0	0	0	0	0	0	0	0	0		Eikenella	0.055142	0.055142	0.055142	0	0.055142	0	0.055142
Eubacterium	0.303281	0.110284	0.165426	0.192997	0.192997	0.165426	0.523849	0.413565	0.385994	0.468707	0.303281	0.441136		Eubacterium	0.324763	0.216509	0.162382	0.135318	0.2977	0.162382	0.487145	0.37889	0.405954	0.351827	0.351827	0.487145		Dialister	0.0571592	0.142898	0.0285796	0.0285796	0.0571592	0	0.0857388	0.0285796	0.0285796	0.0857388	0	0.0285796		Eubacterium	0.303281	0.110284	0.165426	0.192997	0.192997	0.165426	0.523849
Filifactor	0.055142	0.055142	0.082713	0.055142	0.055142	0.110284	0.055142	0.027571	0.055142	0.027571	0.055142	0.110284		Filifactor	0.108254	0.108254	0.0811908	0.0270636	0	0.162382	0.0270636	0.0270636	0.0270636	0.162382	0.0541272	0.108254		Eikenella	0.0571592	0	0.0571592	0.0571592	0.0857388	0	0.0857388	0	0.0285796	0.0285796	0.0571592	0.0571592		Filifactor	0.055142	0.055142	0.082713	0.055142	0.055142	0.110284	0.055142
Fusobacterium	2.53653	3.69451	3.08795	3.6118	2.01268	3.11552	3.4188	3.63937	11.0008	9.76013	4.02537	4.57679		Fusobacterium	2.59811	4.14073	3.00406	3.13938	2.19215	2.86874	2.977	3.5724	10.7984	10.5819	4.76319	4.30311		Enhydrobacter	0	0	0	0	0	0	0	0	0	0.0285796	0.0285796	0		Fusobacterium	2.53653	3.69451	3.08795	3.6118	2.01268	3.11552	3.4188
Gemella	5.21092	5.76234	5.81748	5.65205	3.19824	5.48663	0.496278	0.909843	1.15798	0.716846	0.799559	0.523849		Gemella	4.87145	5.35859	5.76455	5.52097	3.22057	5.33153	0.541272	0.893099	0.920162	0.67659	0.67659	0.541272		Eubacterium	0.314376	0.171478	0.114318	0.257216	0.171478	0.114318	0.400114	0.314376	0.257216	0.314376	0.457274	0.285796		Gemella	5.21092	5.76234	5.81748	5.65205	3.19824	5.48663	0.496278
Gordonia	0	0	0	0	0	0	0	0	0.082713	0	0	0		Geobacillus	0.0270636	0	0	0	0	0	0	0	0	0	0	0		Filifactor	0.114318	0.0571592	0.0857388	0.142898	0.0571592	0.0857388	0.0571592	0.0285796	0.0285796	0.0285796	0.0285796	0.0857388		Gordonia	0	0	0	0	0	0	0
Granulicatella	0.55142	0.523849	0.496278	0.330852	0.27571	0.330852	0.110284	0.137855	0.055142	0.110284	0.055142	0.055142		Gordonia	0	0	0	0	0	0	0	0	0.0811908	0	0	0		Fusobacterium	2.48642	3.54387	3.17233	3.60103	2.34353	3.51529	3.22949	3.82967	11.5176	10.8317	4.57274	4.22978		Granulicatella	0.55142	0.523849	0.496278	0.330852	0.27571	0.330852	0.110284
Haemophilus	3.69451	4.88007	2.9501	4.54921	5.01792	5.18335	2.78467	2.50896	2.70196	2.34353	2.59167	2.04025		Granulicatella	0.541272	0.433018	0.487145	0.405954	0.216509	0.324763	0.0541272	0.108254	0.108254	0.162382	0.0811908	0.0811908		Gemella	5.00143	6.11603	5.97314	5.37296	3.20091	5.25865	0.485853	0.857388	1.00029	0.914547	0.71449	0.600171		Haemophilus	3.69451	4.88007	2.9501	4.54921	5.01792	5.18335	2.78467
Hylemonella	0	0	0	0	0	0	0	0	0.055142	0	0	0		Haemophilus	3.30176	4.46549	2.89581	4.54668	3.70771	4.70907	2.00271	2.46279	2.51691	2.27334	2.19215	2.35453		Gordonia	0	0	0	0	0	0	0	0	0.0571592	0	0	0		Hylemonella	0	0	0	0	0	0	0
Kingella	0.027571	0.027571	0.027571	0.027571	0.027571	0.027571	0	0.027571	0.027571	0.027571	0.055142	0.055142		Hylemonella	0	0	0	0	0	0	0	0	0.0270636	0.0270636	0	0		Granulicatella	0.571592	0.428694	0.514433	0.371535	0.171478	0.314376	0.114318	0.114318	0.0571592	0.142898	0.142898	0.171478		Kingella	0.027571	0.027571	0.027571	0.027571	0.027571	0.027571	0
Lactobacillus	0.413565	0.330852	0.496278	0.27571	0.220568	0.220568	0.468707	0.468707	0.165426	0.165426	0.578991	0.634133		Kingella	0.0270636	0.0811908	0.0270636	0.0270636	0.0270636	0.0270636	0	0.0270636	0.0270636	0.0270636	0.0270636	0.0270636		Haemophilus	3.68677	5.00143	3.05802	4.91569	5.20149	5.4587	2.88654	2.57216	2.28637	2.22921	2.28637	2.8008		Lactobacillus	0.413565	0.330852	0.496278	0.27571	0.220568	0.220568	0.468707
Lactococcus	0	0	0.027571	0	0.055142	0	0	0	0	0	0	0		Lactobacillus	0.460081	0.2977	0.487145	0.189445	0.270636	0.270636	0.433018	0.487145	0.243572	0.216509	0.324763	0.703654		Hylemonella	0	0	0	0	0	0	0	0	0.0285796	0	0	0		Lactococcus	0	0	0.027571	0	0.055142	0	0
Lautropia	15.6052	12.7102	15.3019	12.7378	13.5649	13.7028	33.8296	31.8996	23.9316	26.0546	32.8922	31.2655		Lactococcus	0	0	0.0270636	0	0.0270636	0	0	0	0	0	0	0.0270636		Kingella	0.0285796	0.0571592	0.0571592	0	0.0571592	0.0285796	0.0285796	0.0285796	0.0285796	0.0285796	0.114318	0		Lautropia	15.6052	12.5172	15.3019	12.7378	13.5649	13.7028	33.8296
Leptotrichia	1.79211	2.72953	2.17811	2.37111	2.5641	2.7571	0.578991	0.523849	0.496278	0.55142	0.413565	0.496278		Lautropia	15.0474	11.8268	15.0203	12.5846	13.9378	13.9107	34.7767	30.9337	24.2219	24.8985	32.2598	30.2842		Lactobacillus	0.514433	0.400114	0.514433	0.285796	0.428694	0.171478	0.628751	0.485853	0.228637	0.314376	0.571592	0.657331		Leptotrichia	1.79211	2.72953	2.17811	2.37111	2.5641	2.7571	0.578991
Leuconostoc	0	0	0.027571	0	0	0	0	0	0	0	0	0		Leptotrichia	1.84032	2.73342	2.13802	2.21922	2.21922	2.30041	0.622463	0.622463	0.568336	0.324763	0.460081	0.433018		Lactococcus	0	0	0.0285796	0	0.0571592	0	0	0	0	0	0	0.0285796		Leuconostoc	0	0	0.027571	0	0	0	0
Methylobacterium	0	0	0	0	0	0	0	0	0	0	0.027571	0		Leuconostoc	0	0	0.0270636	0	0	0	0	0	0	0	0	0		Lautropia	15.7188	12.2606	15.8617	13.9468	13.8611	13.5753	35.4101	32.6093	26.7505	26.6648	33.4953	32.4093		Methylobacterium	0	0	0	0	0	0	0
Mogibacterium	0.055142	0.082713	0.027571	0.027571	0.027571	0.055142	0.082713	0.055142	0.110284	0.027571	0.137855	0.192997		Methylobacterium	0	0	0	0	0	0	0	0	0	0	0.0270636	0		Leptotrichia	1.4004	1.85767	1.60046	1.51472	1.60046	1.85767	0.543012	0.457274	0.543012	0.342955	0.571592	0.371535		Mogibacterium	0.055142	0.082713	0.027571	0.027571	0.027571	0.055142	0.082713
Moryella	0	0	0	0	0	0	0	0	0	0	0.027571	0		Microbacterium	0	0	0	0	0	0	0	0	0.0541272	0	0	0		Leuconostoc	0	0	0.0285796	0.0285796	0	0	0	0	0	0	0	0		Moryella	0	0	0	0	0	0	0
Mycoplasma	0.055142	0.110284	0.082713	0.082713	0.192997	0.137855	0.137855	0.137855	0.137855	0.165426	0.220568	0.192997		Mogibacterium	0.0541272	0.135318	0.0270636	0	0.0270636	0.0270636	0.0811908	0.0541272	0.0811908	0.0270636	0.0541272	0.0811908		Methylobacterium	0	0	0	0	0	0	0	0	0	0	0.0285796	0		Mycoplasma	0.055142	0.110284	0.082713	0.082713	0.192997	0.137855	0.137855
Neisseria	34.381	29.2528	33.416	31.7894	35.2357	31.8996	21.5605	20.7058	20.3198	21.0642	21.2021	20.568		Moryella	0	0	0	0	0	0	0.0270636	0	0	0	0.0270636	0		Mogibacterium	0.0285796	0.0571592	0.0285796	0	0.0857388	0.0571592	0.0857388	0.0571592	0.171478	0.0285796	0.228637	0.200057		Neisseria	34.381	29.2528	33.416	31.6515	35.2357	31.8996	21.5605
Oribacterium	0.385994	0.220568	0.248139	0.192997	0.082713	0.330852	0.137855	0.248139	0.192997	0.165426	0.110284	0.192997		Mycoplasma	0.0270636	0.0811908	0.0811908	0.0541272	0.216509	0.135318	0.108254	0.162382	0.0811908	0.162382	0.135318	0.162382		Moryella	0	0	0	0	0	0	0.0285796	0	0	0	0.0285796	0		Oribacterium	0.385994	0.220568	0.248139	0.192997	0.082713	0.330852	0.137855
Paracoccus	0	0	0	0	0	0	0	0.027571	0.192997	0	0	0		Neisseria	34.5332	28.3085	33.2882	30.9878	34.5602	32.341	21.4344	20.866	19.8917	20.5683	21.6509	20.5413		Mycoplasma	0.0571592	0.142898	0.0857388	0	0.142898	0.114318	0.171478	0.171478	0.114318	0.200057	0.0857388	0.200057		Paracoccus	0	0	0	0	0	0	0
Pelomonas	0.055142	0.055142	0.055142	0.055142	0.027571	0.055142	0.055142	0.055142	0.055142	0	0.110284	0.137855		Oribacterium	0.405954	0.189445	0.243572	0.243572	0.162382	0.135318	0.162382	0.243572	0.162382	0.108254	0.0811908	0.324763		Neisseria	36.2675	30.9231	35.1243	33.0952	36.0389	33.381	22.1206	21.1775	20.4344	22.4064	22.5207	21.0632		Pelomonas	0.055142	0.055142	0.055142	0.055142	0.027571	0.055142	0.055142
Peptococcus	0.220568	0.220568	0.137855	0.192997	0.082713	0.055142	0.027571	0.055142	0.110284	0.027571	0.027571	0.055142		Paracoccus	0	0	0	0	0	0	0	0.0270636	0.135318	0	0	0.0270636		Oribacterium	0.428694	0.200057	0.257216	0.228637	0.171478	0.257216	0.200057	0.257216	0.200057	0.142898	0.142898	0.257216		Peptococcus	0.220568	0.220568	0.137855	0.192997	0.082713	0.055142	0.027571
Peptostreptococcus	0.578991	0.27571	0.496278	0.496278	0.385994	0.578991	0.055142	0.220568	0.055142	0.165426	0.137855	0.055142		Pelomonas	0.0270636	0.0270636	0.0541272	0	0.0811908	0.0270636	0.189445	0.0811908	0.0270636	0	0.108254	0.189445		Paracoccus	0	0	0	0	0	0	0	0	0.142898	0	0	0.0285796		Peptostreptococcus	0.578991	0.27571	0.496278	0.496278	0.385994	0.578991	0.055142
Photobacterium	0.027571	0.027571	0.027571	0	0	0.027571	0.027571	0	0	0.055142	0.165426	0.27571		Peptococcus	0.162382	0.135318	0.135318	0.135318	0.0541272	0.0811908	0.0270636	0.0541272	0.0270636	0.0541272	0.0270636	0.0270636		Pelomonas	0.0571592	0.0285796	0.0571592	0	0.114318	0.0857388	0.0857388	0.0857388	0.0285796	0.0285796	0.114318	0.142898		Photobacterium	0.027571	0.027571	0.027571	0	0	0.027571	0.027571
Porphyromonas	0.192997	0.385994	1.18555	0.661704	0.27571	0.661704	0.248139	0.248139	0.964985	0.496278	0.744417	0.385994		Peptostreptococcus	0.568336	0.460081	0.487145	0.568336	0.622463	0.487145	0.0811908	0.189445	0.108254	0.162382	0.162382	0.135318		Peptococcus	0.200057	0.371535	0.142898	0.142898	0.0857388	0.142898	0	0.0571592	0.0857388	0.0857388	0.0285796	0		Porphyromonas	0.192997	0.385994	1.18555	0.661704	0.27571	0.661704	0.248139
Prevotella	5.7072	8.38158	4.49407	6.67218	6.34133	6.97546	5.81748	7.8853	7.71988	7.71988	6.34133	7.63717		Photobacterium	0.0270636	0.0270636	0.0270636	0	0	0.0270636	0	0.0270636	0	0.0270636	0.189445	0.351827		Peptostreptococcus	0.628751	0.600171	0.514433	0.657331	0.400114	0.600171	0.0571592	0.228637	0.0571592	0.114318	0.114318	0.0857388		Prevotella	5.7072	8.38158	4.49407	6.67218	6.34133	6.97546	5.81748
Propionibacterium	0	0	0	0	0	0	0.055142	0.027571	0.027571	0	0.027571	0		Porphyromonas	1.73207	2.16509	2.11096	2.86874	2.30041	2.3816	1.10961	1.35318	1.86739	1.70501	1.00135	1.67794		Photobacterium	0.0285796	0	0.0285796	0	0	0	0	0.0285796	0	0.0571592	0.200057	0.200057		Propionibacterium	0	0	0	0	0	0	0.055142
Pseudomonas	0	0	0	0	0	0	0	0	0.027571	0	0	0.082713		Prevotella	5.84574	8.11908	4.41137	6.63058	6.14344	6.90122	5.52097	7.38836	8.17321	7.33424	6.27876	6.98241		Porphyromonas	0.114318	0.457274	0.200057	0.571592	0.314376	0.571592	0.142898	0.257216	0.743069	0.543012	0.257216	0.457274		Pseudomonas	0	0	0	0	0	0	0
Rothia	3.25338	3.58423	3.47395	3.44637	2.42625	2.5641	4.2735	5.10063	4.57679	4.32865	5.04549	5.40392		Propionibacterium	0	0.0270636	0	0	0	0	0.0541272	0.0270636	0.0270636	0	0	0.0270636		Prevotella	5.65876	8.2595	4.40126	6.74478	6.57331	7.20206	5.85882	7.94513	8.00229	6.91626	6.54473	7.63075		Rothia	3.25338	3.58423	3.47395	3.44637	2.42625	2.5641	4.2735
Selenomonas	0.165426	0.358423	0	0.192997	0.27571	0.082713	0.330852	0.441136	0.441136	0.441136	0.606562	0.578991		Pseudomonas	0	0	0	0	0	0	0	0	0	0	0	0.0811908		Propionibacterium	0	0.0285796	0	0	0	0	0.0285796	0.0285796	0.0285796	0	0.0285796	0		Selenomonas	0.165426	0.358423	0	0.192997	0.27571	0.082713	0.330852
Simonsiella	0.055142	0.055142	0	0	0	0	0	0.055142	0	0.027571	0.027571	0.055142		Pseudoxanthomonas	0	0	0	0	0	0	0	0	0.0270636	0	0	0		Pseudomonas	0	0	0	0	0	0	0	0	0.0285796	0	0	0		Simonsiella	0.055142	0.055142	0	0	0	0	0
Skermanella	0	0	0	0	0	0	0	0	0.027571	0	0	0		Rothia	3.16644	3.5724	3.46414	3.32882	2.54398	2.0839	4.54668	5.08796	4.16779	4.54668	4.95264	6.03518		Pseudoxanthomonas	0	0	0	0	0	0	0	0	0.0285796	0	0	0		Skermanella	0	0	0	0	0	0	0
Sneathia	0	0	0	0	0	0	0	0	0	0	0.027571	0		Selenomonas	0.162382	0.460081	0	0.135318	0.162382	0.0811908	0.433018	0.433018	0.541272	0.405954	0.541272	0.541272		Rothia	3.68677	3.74393	3.57245	3.71535	3.00086	2.74364	4.68705	5.4587	4.40126	4.57274	5.05859	5.43012		Sneathia	0	0	0	0	0	0	0
Staphylococcus	0	0	0	0	0	0	0.027571	0	0.055142	0.082713	0	0		Shuttleworthia	0	0	0	0.0270636	0	0	0	0	0	0	0	0		Selenomonas	0.142898	0.342955	0	0.171478	0.257216	0.114318	0.314376	0.342955	0.428694	0.400114	0.371535	0.485853		Staphylococcus	0	0	0	0	0	0	0.027571
Streptobacillus	0	0.027571	0.055142	0.165426	0.055142	0.055142	0.027571	0.027571	0	0.027571	0	0.027571		Simonsiella	0.0541272	0.135318	0.0270636	0.0270636	0	0	0.0270636	0.0541272	0.0270636	0.0541272	0.0541272	0.0270636		Shuttleworthia	0	0.0285796	0	0	0	0	0	0	0	0	0	0		Streptobacillus	0	0.027571	0.055142	0.165426	0.055142	0.055142	0.027571
Streptococcus	16.2669	15.5776	16.3772	16.2117	17.7006	14.5851	9.7877	10.0083	7.58202	7.94045	9.09843	9.319		Skermanella	0	0	0	0	0	0	0	0	0.0270636	0	0	0		Simonsiella	0.0571592	0.0571592	0	0	0	0	0.0285796	0.0571592	0	0.0571592	0.0285796	0.0285796		Streptococcus	16.2669	15.5776	16.3772	16.2117	17.7006	14.5851	9.7877
Tannerella	0.055142	0.110284	0.055142	0.110284	0.027571	0.082713	0.303281	0.192997	0.992556	0.606562	0.303281	0.192997		Sneathia	0	0	0	0	0	0	0	0	0.0270636	0	0	0		Skermanella	0	0	0	0	0	0	0	0	0.0285796	0	0	0		Tannerella	0.055142	0.110284	0.055142	0.110284	0.027571	0.082713	0.303281
TG5	0.137855	0.027571	0.082713	0.110284	0.110284	0.137855	0.165426	0.192997	0.385994	0.413565	0.248139	0.303281		Staphylococcus	0	0.0270636	0	0	0	0	0.0270636	0	0.0270636	0.0541272	0	0.0270636		Staphylococcus	0	0	0	0	0	0	0.0285796	0	0.0285796	0.0857388	0	0		TG5	0.137855	0.027571	0.082713	0.110284	0.110284	0.137855	0.165426
Treponema	0.110284	0.27571	0.192997	0.110284	0.110284	0.192997	0.578991	0.744417	1.7094	1.32341	0.468707	0.82713		Streptobacillus	0	0.0811908	0.0541272	0.0811908	0.0541272	0.0541272	0.0270636	0.0270636	0.0270636	0.0270636	0	0.0270636		Streptobacillus	0	0.114318	0.0571592	0.114318	0	0.0285796	0.0285796	0.0285796	0.0285796	0.0285796	0	0		Treponema	0.110284	0.27571	0.192997	0.110284	0.110284	0.192997	0.578991
Veillonella	1.0477	1.5164	1.65426	1.54398	1.35098	1.95754	1.15798	0.689275	1.07527	0.634133	0.468707	0.413565		Streptococcus	16.0487	14.3978	15.9675	15.6157	17.1583	14.5873	9.41813	10.1218	7.14479	8.11908	9.25575	9.06631		Streptococcus	15.3758	16.2046	16.1189	15.5473	16.2046	15.433	9.91712	9.91712	7.002	8.03087	9.20263	9.25979		Veillonella	1.0477	1.5164	1.65426	1.54398	1.35098	1.95754	1.15798
														Tannerella	0.0270636	0.108254	0.0541272	0.0811908	0.0811908	0.0811908	0.243572	0.216509	1.16373	0.541272	0.2977	0.135318		Tannerella	0	0.171478	0	0.0571592	0.0571592	0.114318	0.142898	0.0571592	1.31466	0.428694	0.342955	0.0571592
														TG5	0.0811908	0.0541272	0.0811908	0.108254	0.108254	0.0811908	0.189445	0.216509	0.433018	0.460081	0.243572	0.243572		TG5	0.142898	0.0857388	0.0857388	0.0857388	0.142898	0.142898	0.171478	0.228637	0.314376	0.457274	0.428694	0.171478
														Treponema	0.0811908	0.270636	0.189445	0.135318	0.0541272	0.162382	0.433018	0.703654	1.67794	1.08254	0.541272	0.622463		Treponema	0.0857388	0.314376	0.200057	0.200057	0.171478	0.171478	0.371535	0.457274	1.65762	1.08602	0.628751	0.71449
														Veillonella	1.05548	1.56969	1.62382	1.40731	1.70501	1.70501	1.08254	0.568336	0.920162	0.649526	0.541272	0.595399		unclassified	1.97199	2.14347	2.11489	2.37211	2.22921	2.40069	3.37239	3.71535	4.2012	4.40126	3.74393	3.57245
																												Veillonella	1.14318	1.4004	1.71478	1.5433	1.65762	1.88625	1.20034	0.657331	1.08602	0.571592	0.457274	0.771649
[truncated: 31 more columns]

## Sheet: OTU_97
Pipeline 1															Pipeline 2															Pipeline 3															Pipeline 4
OTU	Taxonomy (phylum; class; order; family; genus; species)	E_1_1	E_1_2	E_2_1	E_2_2	E_3_1	E_3_2	M_1_1	M_1_2	M_2_1	M_2_2	M_3_1	M_3_2		OTU	Taxonomy (phylum; class; order; family; genus; species)	E_1_1	E_1_2	E_2_1	E_2_2	E_3_1	E_3_2	M_1_1	M_1_2	M_2_1	M_2_2	M_3_1	M_3_2		OTU	Taxonomy (phylum; class; order; family; genus; species)	E_1_1	E_1_2	E_2_1	E_2_2	E_3_1	E_3_2	M_1_1	M_1_2	M_2_1	M_2_2	M_3_1	M_3_2		OTU	Taxonomy (phylum; class; order; family; genus; species)	E_1_1	E_1_2	E_2_1
OTU001	Bacteria; Proteobacteria; Betaproteobacteria; Neisseriales; Neisseriaceae; Neisseria; unclassified	26.606	21.8362	26.0822	24.0419	26.992	25.4756	15.8533	14.2818	14.0888	14.9986	15.743	14.5299		OTU001	Bacteria; Proteobacteria; Betaproteobacteria; Neisseriales; Neisseriaceae; Neisseria; unclassified	26.1164	21.4073	25.6834	23.8972	27.0095	24.4114	16.0758	14.2896	14.2355	14.452	15.5886	14.8038		OTU0001	Bacteria; Proteobacteria; Betaproteobacteria; Neisseriales; Neisseriaceae; Neisseria; unclassified	27.465	22.9494	27.0363	24.95	28.2652	25.3215	16.3761	14.4327	14.2041	15.8331	16.0903	15.0329		OTU001	Bacteria; Firmicutes; Bacilli; Lactobacillales; Streptococcaceae; Streptococcus; Streptococcus salivarius	0	0	0
OTU002	Bacteria; Proteobacteria; Betaproteobacteria; Burkholderiales; Burkholderiaceae; Lautropia; unclassified	13.6752	11.4695	14.0888	11.3593	12.5724	12.3794	31.6515	27.957	22.2498	23.0494	29.501	27.5986		OTU002	Bacteria; Proteobacteria; Betaproteobacteria; Burkholderiales; Burkholderiaceae; Lautropia; unclassified	13.1258	10.5277	13.8295	11.4479	12.9093	12.6387	32.2057	27.3884	22.138	22.0568	28.7686	26.9824		OTU0002	Bacteria; Proteobacteria; Betaproteobacteria; Burkholderiales; Burkholderiaceae; Lautropia; unclassified	14.004	11.0889	14.6042	12.4607	12.918	12.3464	33.038	28.6082	24.8071	23.6353	29.8943	28.551		OTU002	Bacteria; Firmicutes; Clostridia; Clostridiales; Veillonellaceae; Dialister; Dialister invisus	0.027571	0.082713	0.027571
OTU003	Bacteria; Proteobacteria; Betaproteobacteria; Neisseriales; Neisseriaceae; Neisseria; unclassified	6.12076	4.32865	5.43149	5.18335	5.81748	4.49407	3.77723	4.54921	4.30108	3.8048	4.10808	4.24593		OTU003	Bacteria; Proteobacteria; Betaproteobacteria; Neisseriales; Neisseriaceae; Neisseria; unclassified	5.81867	4.0866	5.33153	4.27605	4.92558	5.35859	3.30176	4.41137	3.4912	3.7889	4.27605	3.68065		OTU0003	Bacteria; Proteobacteria; Betaproteobacteria; Neisseriales; Neisseriaceae; Neisseria; unclassified	6.14461	4.97285	5.63018	5.6016	5.80166	4.94427	3.60103	4.62989	4.14404	4.02972	4.37268	3.88682		OTU003	Bacteria; Firmicutes; Clostridia; Clostridiales; Veillonellaceae; Dialister; Dialister pneumosintes	0.027571	0.055142	0
OTU004	Bacteria; Actinobacteria; Actinobacteria; Actinomycetales; Micrococcaceae; Rothia; unclassified	3.22581	3.44637	3.39123	3.33609	2.39868	2.50896	4.24593	4.96278	4.43893	4.10808	4.96278	5.34877		OTU004	Bacteria; Actinobacteria; Actinobacteria; Actinomycetales; Micrococcaceae; Rothia; unclassified	3.13938	3.41001	3.32882	3.13938	2.46279	1.94858	4.3843	4.87145	4.03248	4.22192	4.89851	5.84574		OTU0004	Bacteria; Actinobacteria; Actinobacteria; Actinomycetales; Micrococcaceae; Rothia; unclassified	3.62961	3.65819	3.51529	3.68677	2.91512	2.68648	4.60131	5.3158	4.3441	4.487	4.97285	5.34438		OTU004	Bacteria; Firmicutes; Clostridia; Clostridiales; Veillonellaceae; Anaeroglobus; unclassified	0	0	0.055142
OTU005	Bacteria; Firmicutes; Bacilli; Lactobacillales; Streptococcaceae; Streptococcus; Streptococcus oralis	4.05294	4.32865	4.32865	4.4665	4.71464	3.25338	2.50896	2.26082	1.9024	1.9024	1.95754	2.12297		OTU005	Bacteria; Firmicutes; Bacilli; Lactobacillales; Streptococcaceae; Streptococcus; Streptococcus oralis	3.95129	3.97835	4.24899	4.22192	4.30311	3.22057	2.3816	2.19215	2.00271	1.89445	2.16509	1.89445		OTU0005	Bacteria; Firmicutes; Bacilli; Lactobacillales; Streptococcaceae; Streptococcus; Streptococcus oralis	3.97256	4.54416	4.45842	4.2012	4.65847	3.62961	2.74364	2.22921	1.97199	1.88625	2.05773	2.00057		OTU005	Bacteria; Firmicutes; Clostridia; Clostridiales; Veillonellaceae; Veillonella; unclassified	1.0477	1.48883	1.65426
OTU006	Bacteria; Firmicutes; Bacilli; Lactobacillales; Streptococcaceae; Streptococcus; unclassified	1.9024	1.9024	2.48139	1.92997	2.04025	1.79211	3.17066	3.77723	2.70196	3.08795	3.4188	3.50152		OTU006	Bacteria; Firmicutes; Bacilli; Lactobacillales; Streptococcaceae; Streptococcus; unclassified	1.86739	1.73207	2.43572	2.02977	2.21922	1.84032	3.2747	3.84303	2.46279	2.86874	3.43708	3.5724		OTU0006	Bacteria; Firmicutes; Bacilli; Gemellales; Gemellaceae; Gemella; unclassified	4.94427	6.08745	5.94456	5.34438	3.17233	5.23007	0.485853	0.828808	1.00029	0.914547	0.71449	0.571592		OTU006	Bacteria; Firmicutes; Clostridia; Clostridiales; Veillonellaceae; Selenomonas; unclassified	0.027571	0.137855	0
OTU007	Bacteria; Firmicutes; Bacilli; Lactobacillales; Streptococcaceae; Streptococcus; unclassified	4.43893	3.99779	3.83237	0.496278	4.74221	0.689275	1.73697	2.15054	1.24069	1.10284	0.137855	1.5164		OTU007	Bacteria; Firmicutes; Bacilli; Lactobacillales; Streptococcaceae; Streptococcus; unclassified	4.73613	3.59946	4.00541	3.05819	4.70907	2.84168	1.54263	2.16509	1.1908	1.29905	0.243572	1.7862		OTU0007	Bacteria; Firmicutes; Bacilli; Lactobacillales; Streptococcaceae; Streptococcus; unclassified	1.88625	2.31495	2.57216	2.42927	2.02915	2.00057	3.34381	3.82967	2.62932	2.8008	3.80109	4.14404		OTU007	Bacteria; Firmicutes; Clostridia; Clostridiales; Veillonellaceae; Selenomonas; unclassified	0	0	0
OTU008	Bacteria; Firmicutes; Clostridia; Clostridiales; Lachnospiraceae; Catonella; unclassified	1.65426	1.37855	1.26827	1.62669	1.46126	1.62669	2.31596	2.70196	2.72953	3.06038	2.89495	2.9501		OTU008	Bacteria; Firmicutes; Clostridia; Clostridiales; Lachnospiraceae; Catonella; unclassified	1.65088	1.24493	1.24493	1.43437	1.32612	1.29905	2.16509	2.76049	2.6793	2.89581	2.32747	2.89581		OTU0008	Bacteria; Firmicutes; Bacilli; Lactobacillales; Streptococcaceae; Streptococcus; unclassified	4.85853	4.28694	4.22978	2.9437	4.62989	3.20091	1.80051	2.37211	1.20034	1.71478	0.314376	1.6862		OTU008	Bacteria; Firmicutes; Clostridia; Clostridiales; Veillonellaceae; Dialister; Dialister pneumosintes	0	0	0
OTU009	Bacteria; Proteobacteria; Betaproteobacteria; Burkholderiales; Burkholderiaceae; Lautropia; unclassified	1.92997	1.02013	1.21312	1.35098	0.992556	1.29584	2.15054	3.8048	1.62669	2.86738	3.33609	3.63937		OTU009	Bacteria; Firmicutes; Bacilli; Gemellales; Gemellaceae; Gemella; Gemella sanguinis	3.68065	3.59946	3.73478	3.73478	2.40866	3.5724	0.324763	0.487145	0.595399	0.351827	0.405954	0.324763		OTU0009	Bacteria; Firmicutes; Clostridia; Clostridiales; Lachnospiraceae; Catonella; unclassified	1.5433	1.51472	1.34324	1.94341	1.6862	1.48614	2.45785	2.88654	3.05802	3.0866	2.11489	2.68648		OTU009	Bacteria; Firmicutes; Clostridia; Clostridiales; Veillonellaceae; Veillonella; unclassified	0	0.027571	0
OTU010	Bacteria; Firmicutes; Bacilli; Gemellales; Gemellaceae; Gemella; Gemella sanguinis	3.85994	3.69451	3.77723	4.08051	2.45382	3.8048	0.358423	0.496278	0.634133	0.496278	0.441136	0.27571		OTU010	Bacteria; Proteobacteria; Gammaproteobacteria; Pasteurellales; Pasteurellaceae; Haemophilus; Haemophilus parainfluenzae	1.84032	2.40866	1.73207	2.3816	2.6793	2.54398	1.59675	1.40731	1.43437	1.08254	1.38024	1.40731		OTU0010	Bacteria; Proteobacteria; Gammaproteobacteria; Pasteurellales; Pasteurellaceae; Haemophilus; Haemophilus parainfluenzae	2.05773	2.97228	1.80051	2.74364	2.91512	2.9437	1.45756	1.51472	1.31466	1.17176	1.48614	1.74336		OTU010	Bacteria; Firmicutes; Clostridia; Clostridiales; Veillonellaceae; Anaeroglobus; unclassified	0	0	0.027571
OTU011	Bacteria; Proteobacteria; Gammaproteobacteria; Pasteurellales; Pasteurellaceae; Haemophilus; Haemophilus parainfluenzae	1.9024	2.67439	1.76454	2.37111	2.70196	3.08795	1.65426	1.43369	1.62669	1.0477	1.65426	1.35098		OTU011	Bacteria; Bacteroidetes; Bacteroidia; Bacteroidales; Prevotellaceae; Prevotella; Prevotella melaninogenica	1.59675	1.97564	1.32612	2.05683	2.24628	2.27334	0.920162	1.38024	1.62382	1.1908	1.40731	1.38024		OTU0011	Bacteria; Bacteroidetes; Bacteroidia; Bacteroidales; Prevotellaceae; Prevotella; Prevotella tannerae	1.14318	1.71478	1.02887	1.74336	0.828808	1.74336	1.1146	1.5433	1.94341	1.88625	1.62904	2.00057		OTU011	Bacteria; Firmicutes; Clostridia; Clostridiales; Veillonellaceae; Selenomonas; unclassified	0.055142	0.055142	0
OTU012	Bacteria; Fusobacteria; Fusobacteria; Fusobacteriales; Fusobacteriaceae; Fusobacterium; unclassified	0.55142	0.771988	0.496278	0.578991	0.248139	0.330852	0.854701	0.909843	6.25862	5.04549	1.21312	1.0477		OTU012	Bacteria; Fusobacteria; Fusobacteria; Fusobacteriales; Fusobacteriaceae; Fusobacterium; unclassified	0.487145	0.730717	0.487145	0.460081	0.2977	0.243572	0.757781	0.811908	5.79161	5.49391	1.4885	1.16373		OTU0012	Bacteria; Fusobacteria; Fusobacteria; Fusobacteriales; Fusobacteriaceae; Fusobacterium; unclassified	0.628751	0.600171	0.68591	0.943127	0.68591	1.00029	1.31466	1.60046	2.71506	3.42955	2.02915	1.77193		OTU012	Bacteria; Firmicutes; Clostridia; Clostridiales; Veillonellaceae; Veillonella; unclassified	0	0	0
OTU013	Bacteria; Bacteroidetes; Bacteroidia; Bacteroidales; Prevotellaceae; Prevotella; Prevotella tannerae	0.964985	1.79211	0.992556	1.18555	0.937414	1.35098	1.02013	1.57155	1.92997	1.92997	1.37855	1.92997		OTU013	Bacteria; Bacteroidetes; Bacteroidia; Bacteroidales; Prevotellaceae; Prevotella; Prevotella tannerae	1.08254	1.75913	0.97429	1.40731	0.757781	1.43437	1.02842	1.35318	2.16509	1.75913	1.51556	1.70501		OTU0013	Bacteria; Proteobacteria; Epsilonproteobacteria; Campylobacterales; Campylobacteraceae; Campylobacter; Campylobacter concisus	0.828808	0.943127	0.828808	0.885967	1.28608	1.02887	2.11489	1.80051	1.71478	1.94341	1.71478	2.00057		OTU013	Bacteria; Firmicutes; Clostridia; Clostridiales; Veillonellaceae; Veillonella; Veillonella dispar	0	0	0
OTU014	Bacteria; Proteobacteria; Epsilonproteobacteria; Campylobacterales; Campylobacteraceae; Campylobacter; Campylobacter concisus	0.854701	1.02013	0.799559	1.07527	1.29584	0.964985	2.06782	1.7094	1.81969	1.81969	1.59912	1.81969		OTU014	Bacteria; Proteobacteria; Epsilonproteobacteria; Campylobacterales; Campylobacteraceae; Campylobacter; Campylobacter concisus	0.811908	1.13667	0.784844	1.00135	0.97429	1.05548	2.30041	1.70501	1.65088	1.67794	1.70501	2.02977		OTU0014	Bacteria; Bacteroidetes; Bacteroidia; Bacteroidales; Prevotellaceae; Prevotella; Prevotella melaninogenica	1.28608	1.31466	1.05744	1.60046	1.97199	2.31495	1.02887	1.08602	1.2575	0.857388	1.14318	1.05744		OTU014	Bacteria; Firmicutes; Clostridia; Clostridiales; Veillonellaceae; Selenomonas; Selenomonas noxia	0	0	0
OTU015	Bacteria; Bacteroidetes; Bacteroidia; Bacteroidales; Prevotellaceae; Prevotella; Prevotella melaninogenica	1.35098	1.59912	1.02013	1.54398	1.79211	1.87483	0.854701	0.909843	1.40612	0.937414	1.10284	1.13041		OTU015	Bacteria; Fusobacteria; Fusobacteria; Fusobacteriales; Fusobacteriaceae; Fusobacterium; unclassified	0.67659	0.622463	0.649526	0.622463	0.67659	0.622463	1.24493	1.40731	2.977	3.32882	1.51556	1.67794		OTU0015	Bacteria; Proteobacteria; Betaproteobacteria; Burkholderiales; Burkholderiaceae; Lautropia; unclassified	0.571592	0.857388	0.943127	1.20034	0.628751	0.800229	2.14347	1.6862	1.57188	1.20034	2.14347	2.02915		OTU015	Bacteria; Firmicutes; Clostridia; Clostridiales; Veillonellaceae; Selenomonas; unclassified	0	0.027571	0
OTU016	Bacteria; Fusobacteria; Fusobacteria; Fusobacteriales; Fusobacteriaceae; Fusobacterium; unclassified	0.606562	0.55142	0.661704	0.799559	0.578991	0.744417	1.35098	1.46126	2.86738	2.72953	1.40612	1.73697		OTU016	Bacteria; Fusobacteria; Fusobacteria; Fusobacteriales; Fusobacteriaceae; Fusobacterium; unclassified	1.08254	2.16509	1.43437	1.73207	0.97429	1.73207	0.541272	0.811908	1.29905	1.40731	1.05548	1.00135		OTU0016	Bacteria; Proteobacteria; Betaproteobacteria; Neisseriales; Neisseriaceae; Neisseria; unclassified	1.31466	1.4004	1.22892	0.857388	1.28608	1.37182	1.51472	1.14318	1.02887	1.4004	1.28608	1.31466		OTU016	Bacteria; Firmicutes; Clostridia; Clostridiales; Veillonellaceae; Veillonella; unclassified	0	0	0
OTU017	Bacteria; Proteobacteria; Betaproteobacteria; Neisseriales; Neisseriaceae; Neisseria; unclassified	1.32341	1.40612	1.18555	1.07527	1.35098	0.909843	1.24069	1.07527	1.13041	1.32341	1.10284	1.35098		OTU017	Bacteria; Proteobacteria; Betaproteobacteria; Burkholderiales; Burkholderiaceae; Lautropia; unclassified	0.649526	0.784844	0.893099	0.811908	0.703654	0.866035	2.19215	1.46143	1.56969	1.08254	1.97564	1.92152		OTU0017	Bacteria; Fusobacteria; Fusobacteria; Fusobacteriales; Fusobacteriaceae; Fusobacterium; unclassified	1.02887	1.77193	1.51472	1.88625	1.05744	1.91483	0.743069	0.857388	1.1146	1.31466	0.771649	0.885967		OTU017	Bacteria; Firmicutes; Clostridia; Clostridiales; Veillonellaceae; Selenomonas; Selenomonas sputigena	0.027571	0.082713	0
OTU018	Bacteria; Fusobacteria; Fusobacteria; Fusobacteriales; Fusobacteriaceae; Fusobacterium; unclassified	0.992556	0	0.055142	2.01268	0.909843	1.84726	0.661704	0.744417	1.13041	1.43369	0.909843	1.26827		OTU018	Bacteria; Proteobacteria; Betaproteobacteria; Neisseriales; Neisseriaceae; Neisseria; unclassified	1.38024	1.08254	1.16373	1.00135	1.05548	0.893099	1.32612	1.05548	0.97429	1.02842	0.97429	1.24493		OTU0018	Bacteria; Proteobacteria; Gammaproteobacteria; Pasteurellales; Pasteurellaceae; Haemophilus; Haemophilus parainfluenzae	1.20034	1.08602	0.828808	1.42898	1.37182	1.6862	1.17176	0.800229	0.771649	0.857388	0.543012	0.771649		OTU018	Bacteria; Firmicutes; Clostridia; Clostridiales; Veillonellaceae; Selenomonas; Selenomonas sputigena	0	0	0
OTU019	Bacteria; Proteobacteria; Gammaproteobacteria; Pasteurellales; Pasteurellaceae; Haemophilus; Haemophilus parainfluenzae	1.32341	1.10284	0.799559	1.21312	1.54398	1.24069	0.744417	0.799559	0.661704	1.02013	0.634133	0.441136		OTU019	Bacteria; Firmicutes; Bacilli; Gemellales; Gemellaceae; Gemella; unclassified	1.16373	1.67794	1.92152	1.67794	0.67659	1.59675	0.189445	0.37889	0.324763	0.2977	0.270636	0.189445		OTU0019	Bacteria; Fusobacteria; Fusobacteria; Fusobacteriales; Fusobacteriaceae; Fusobacterium; unclassified	0.171478	0.543012	0.142898	0.0857388	0.0571592	0.228637	0.114318	0.142898	6.91626	2.515	0.314376	0.457274		OTU019	Bacteria; Firmicutes; Clostridia; Clostridiales; Veillonellaceae; Selenomonas; unclassified	0.055142	0	0
OTU020	Bacteria; Firmicutes; Bacilli; Gemellales; Gemellaceae; Gemella; unclassified	1.32341	2.01268	1.95754	1.5164	0.689275	1.62669	0.137855	0.385994	0.523849	0.220568	0.358423	0.220568		OTU020	Bacteria; Proteobacteria; Gammaproteobacteria; Pasteurellales; Pasteurellaceae; Haemophilus; Haemophilus parainfluenzae	1.05548	1.21786	0.784844	1.1908	0.108254	1.54263	0.108254	0.811908	0.730717	0.97429	0.703654	0.595399		OTU0020	Bacteria; Firmicutes; Bacilli; Lactobacillales; Streptococcaceae; Streptococcus; Streptococcus infantis	1.34324	1.51472	1.20034	1.51472	1.80051	1.74336	0.342955	0.257216	0.142898	0.200057	0.228637	0.257216		OTU020	Bacteria; Firmicutes; Clostridia; Clostridiales; Veillonellaceae; Selenomonas; Selenomonas sputigena	0	0.027571	0
OTU021	Bacteria; Firmicutes; Bacilli; Lactobacillales; Streptococcaceae; Streptococcus; Streptococcus infantis	1.32341	1.43369	1.15798	1.46126	1.76454	1.59912	0.385994	0.27571	0.248139	0.220568	0.248139	0.248139		OTU021	Bacteria; Firmicutes; Bacilli; Lactobacillales; Streptococcaceae; Streptococcus; Streptococcus infantis	1.29905	1.27199	1.13667	1.29905	1.56969	1.67794	0.2977	0.324763	0.243572	0.162382	0.270636	0.162382		OTU0021	Bacteria; Proteobacteria; Betaproteobacteria; Burkholderiales; Burkholderiaceae; Lautropia; unclassified	1.1146	0.285796	0.314376	0.228637	0.285796	0.257216	0.171478	2.22921	0.342955	1.80051	1.34324	1.62904		OTU021	Bacteria; Firmicutes; Clostridia; Clostridiales; Veillonellaceae; Selenomonas; Selenomonas noxia	0	0.027571	0
OTU022	Bacteria; Firmicutes; Clostridia; Clostridiales; Veillonellaceae; Veillonella; Veillonella parvula	0.854701	0.909843	1.26827	1.07527	0.716846	0.606562	0.909843	0.523849	0.744417	0.496278	0.385994	0.27571		OTU022	Bacteria; Proteobacteria; Betaproteobacteria; Burkholderiales; Burkholderiaceae; Lautropia; unclassified	1.24493	0.270636	0.2977	0.189445	0.324763	0.243572	0.351827	1.94858	0.324763	1.62382	1.35318	1.29905		OTU0022	Bacteria; Firmicutes; Clostridia; Clostridiales; Veillonellaceae; Veillonella; Veillonella parvula	0.885967	0.800229	1.31466	0.971706	0.971706	0.657331	0.885967	0.485853	0.71449	0.371535	0.428694	0.628751		OTU022	Bacteria; Firmicutes; Clostridia; Clostridiales; Veillonellaceae; Selenomonas; unclassified	0	0	0
OTU023	Bacteria; Fusobacteria; Fusobacteria; Fusobacteriales; Fusobacteriaceae; unclassified; unclassified	0.330852	0.523849	0.413565	0.468707	0.716846	0.634133	1.15798	0.634133	0.661704	0.964985	0.634133	0.992556		OTU023	Bacteria; Bacteroidetes; Bacteroidia; Bacteroidales; Porphyromonadaceae; Porphyromonas; unclassified	0.97429	0.97429	1.00135	1.59675	1.13667	0.947226	0.514208	0.433018	0.460081	0.514208	0.37889	0.487145		OTU0023	Bacteria; Fusobacteria; Fusobacteria; Fusobacteriales; Fusobacteriaceae; Fusobacterium; unclassified	0.371535	0.0571592	0.371535	0.400114	0.342955	0	0.71449	0.71449	0.228637	3.11518	0.771649	0.68591		OTU023	Bacteria; Firmicutes; Clostridia; Clostridiales; Veillonellaceae; Selenomonas; Selenomonas sputigena	0	0	0
OTU024	Bacteria; Bacteroidetes; Bacteroidia; Bacteroidales; Prevotellaceae; Prevotella; Prevotella oris	0.413565	0.55142	0.192997	0.413565	0.468707	0.27571	0.578991	1.21312	0.634133	1.07527	0.523849	0.689275		OTU024	Bacteria; Firmicutes; Clostridia; Clostridiales; Veillonellaceae; Veillonella; Veillonella parvula	0.838972	1.00135	1.24493	0.784844	0.97429	0.703654	0.838972	0.433018	0.568336	0.460081	0.433018	0.460081		OTU0024	Bacteria; Bacteroidetes; Bacteroidia; Bacteroidales; Prevotellaceae; Prevotella; Prevotella oris	0.342955	0.514433	0.200057	0.342955	0.400114	0.200057	0.600171	1.08602	0.885967	0.914547	0.600171	0.857388		OTU024	Bacteria; Proteobacteria; Deltaproteobacteria; Desulfobacterales; Desulfobulbaceae; Desulfobulbus; unclassified	0	0	0.027571
OTU025	Bacteria; TM7; TM7-3; EW055; unclassified; unclassified; unclassified	0.165426	0.248139	0.27571	0.523849	0.248139	0.385994	0.771988	0.771988	0.716846	0.799559	0.716846	0.854701		OTU025	Bacteria; Firmicutes; Bacilli; Lactobacillales; Streptococcaceae; Streptococcus; Streptococcus infantis	1.05548	0.97429	1.27199	0.838972	1.21786	1.1908	0.270636	0.2977	0.2977	0.514208	0.433018	0.2977		OTU0025	Bacteria; Firmicutes; Bacilli; Lactobacillales; Streptococcaceae; Streptococcus; Streptococcus sanguinis	0.571592	0.600171	0.485853	0.800229	0.543012	0.457274	0.71449	0.68591	0.457274	0.571592	0.371535	0.371535		OTU025	Bacteria; Tenericutes; Mollicutes; RF39; unclassified; unclassified; unclassified	0	0.027571	0.027571
OTU026	Bacteria; Firmicutes; Bacilli; Lactobacillales; Streptococcaceae; Streptococcus; Streptococcus sanguinis	0.634133	0.578991	0.468707	0.689275	0.689275	0.385994	0.744417	0.606562	0.413565	0.55142	0.248139	0.468707		OTU026	Bacteria; Fusobacteria; Fusobacteria; Fusobacteriales; Fusobacteriaceae; unclassified; unclassified	0.37889	0.757781	0.405954	0.433018	0.703654	0.67659	1.16373	0.67659	0.703654	0.920162	0.703654	1.00135		OTU0026	Bacteria; TM7; TM7-3; EW055; unclassified; unclassified; unclassified	0.171478	0.171478	0.285796	0.400114	0.285796	0.257216	1.00029	0.885967	0.743069	0.800229	0.600171	0.828808		OTU026	Bacteria; Firmicutes; Clostridia; Clostridiales; Peptococcaceae; Peptococcus; unclassified	0.165426	0.082713	0.055142
OTU027	Bacteria; Firmicutes; Bacilli; Lactobacillales; Streptococcaceae; Streptococcus; unclassified	0.909843	0.909843	0.909843	0.385994	0.799559	1.10284	0.385994	0.137855	0.303281	0.082713	0.220568	0.303281		OTU027	Bacteria; Proteobacteria; Betaproteobacteria; Neisseriales; Neisseriaceae; Neisseria; unclassified	0.866035	0.595399	0.622463	0.784844	0.838972	0.947226	0.324763	0.2977	0.487145	0.460081	0.541272	0.37889		OTU0027	Bacteria; Proteobacteria; Betaproteobacteria; Neisseriales; Neisseriaceae; Neisseria; unclassified	0.971706	0.68591	0.628751	0.771649	0	1.02887	0	0.285796	0.571592	0.543012	0.457274	0.342955		OTU027	Bacteria; Firmicutes; Clostridia; Clostridiales; Peptococcaceae; Peptococcus; unclassified	0.055142	0.137855	0.082713
OTU028	Bacteria; Bacteroidetes; Flavobacteria; Flavobacteriales; Flavobacteriaceae; Capnocytophaga; Capnocytophaga sputigena	0.192997	0.441136	0.220568	0.27571	0.578991	0.330852	0.716846	0.55142	0.578991	0.661704	0.523849	0.578991		OTU028	Bacteria; Bacteroidetes; Bacteroidia; Bacteroidales; Prevotellaceae; Prevotella; Prevotella oris	0.405954	0.595399	0.189445	0.37889	0.351827	0.216509	0.433018	1.02842	1.05548	0.920162	0.703654	0.595399		OTU0028	Bacteria; Bacteroidetes; Bacteroidia; Bacteroidales; Prevotellaceae; Prevotella; Prevotella melaninogenica	0.428694	0.771649	0.342955	0.485853	0.68591	0.514433	0.114318	0.543012	0.314376	0.543012	0.400114	0.485853		OTU028	Bacteria; Firmicutes; Clostridia; Clostridiales; unclassified; unclassified; unclassified	0	0.027571	0
OTU029	Bacteria; Firmicutes; Bacilli; Lactobacillales; Streptococcaceae; Streptococcus; unclassified	0.248139	0.220568	0.248139	2.26082	0	2.15054	0.027571	0	0.027571	0	0.137855	0.082713		OTU029	Bacteria; TM7; TM7-3; EW055; unclassified; unclassified; unclassified	0.135318	0.270636	0.270636	0.460081	0.243572	0.324763	0.893099	0.784844	0.784844	0.730717	0.622463	0.947226		OTU0029	Bacteria; Bacteroidetes; Flavobacteria; Flavobacteriales; Flavobacteriaceae; Capnocytophaga; Capnocytophaga sputigena	0.200057	0.342955	0.228637	0.371535	0.68591	0.400114	0.600171	0.543012	0.543012	0.600171	0.485853	0.628751		OTU029	Bacteria; Tenericutes; Mollicutes; RF39; unclassified; unclassified; unclassified	0.248139	0.082713	0.055142
OTU030	Bacteria; Bacteroidetes; Bacteroidia; Bacteroidales; Prevotellaceae; Prevotella; Prevotella intermedia	0.248139	0.330852	0.192997	0.358423	0.165426	0.137855	0.468707	0.744417	0.248139	0.964985	0.55142	0.992556		OTU030	Bacteria; Firmicutes; Bacilli; Lactobacillales; Streptococcaceae; Streptococcus; Streptococcus sanguinis	0.67659	0.460081	0.460081	0.514208	0.784844	0.37889	0.67659	0.622463	0.243572	0.730717	0.243572	0.351827		OTU0030	Bacteria; Bacteroidetes; Bacteroidia; Bacteroidales; Prevotellaceae; Prevotella; Prevotella intermedia	0.285796	0.342955	0.200057	0.342955	0.257216	0.142898	0.514433	0.857388	0.428694	0.571592	0.771649	0.800229		OTU030	Bacteria; Actinobacteria; Actinobacteria; Actinomycetales; Actinomycetaceae; Actinomyces; unclassified	0	0	0
OTU031	Bacteria; Bacteroidetes; Bacteroidia; Bacteroidales; Prevotellaceae; Prevotella; Prevotella melaninogenica	0.413565	0.661704	0.330852	0.55142	0.606562	0.578991	0.220568	0.523849	0.220568	0.358423	0.385994	0.413565		OTU031	Bacteria; Firmicutes; Bacilli; Lactobacillales; Streptococcaceae; Streptococcus; Streptococcus oralis	0.811908	0.784844	0.757781	0.595399	0.568336	0.67659	0.162382	0.324763	0.189445	0.243572	0.405954	0.216509		OTU0031	Bacteria; Firmicutes; Bacilli; Lactobacillales; Streptococcaceae; Streptococcus; Streptococcus infantis	0.342955	0.857388	1.28608	0.228637	0.771649	0.600171	0.285796	0.0857388	0.200057	0.285796	0.314376	0.0571592		OTU031	Bacteria; Actinobacteria; Actinobacteria; Actinomycetales; Actinomycetaceae; Actinomyces; unclassified	0	0.027571	0
OTU032	Bacteria; Firmicutes; Bacilli; Lactobacillales; Streptococcaceae; Streptococcus; unclassified	0.716846	0.468707	0.606562	0.689275	0.578991	0.523849	0.027571	0.220568	0.137855	0.27571	0.55142	0.248139		OTU032	Bacteria; Bacteroidetes; Flavobacteria; Flavobacteriales; Flavobacteriaceae; Capnocytophaga; Capnocytophaga sputigena	0.162382	0.351827	0.216509	0.324763	0.514208	0.351827	0.703654	0.405954	0.487145	0.811908	0.514208	0.514208		OTU0032	Bacteria; Firmicutes; Bacilli; Lactobacillales; Lactobacillaceae; Lactobacillus; Lactobacillus delbrueckii	0.514433	0.400114	0.514433	0.285796	0.428694	0.171478	0.628751	0.485853	0.228637	0.314376	0.571592	0.657331		OTU032	Bacteria; Firmicutes; Clostridia; Clostridiales; Veillonellaceae; Selenomonas; unclassified	0	0	0
OTU033	Bacteria; Firmicutes; Clostridia; Clostridiales; Veillonellaceae; Veillonella; unclassified	0.192997	0.578991	0.385994	0.441136	0.634133	1.29584	0.248139	0.165426	0.303281	0.137855	0.082713	0.110284		OTU033	Bacteria; Bacteroidetes; Bacteroidia; Bacteroidales; Prevotellaceae; Prevotella; Prevotella intermedia	0.2977	0.2977	0.189445	0.243572	0.216509	0.135318	0.541272	0.811908	0.405954	0.568336	0.433018	0.866035		OTU0033	Bacteria; Firmicutes; Clostridia; Clostridiales; Veillonellaceae; Veillonella; unclassified	0.257216	0.571592	0.400114	0.571592	0.68591	1.20034	0.314376	0.171478	0.342955	0.171478	0.0285796	0.114318		OTU033	Bacteria; Firmicutes; Bacilli; Lactobacillales; Streptococcaceae; Streptococcus; Streptococcus oralis	5.81748	5.67963	5.65205
OTU034	Bacteria; Firmicutes; Bacilli; Lactobacillales; Lactobacillaceae; Lactobacillus; Lactobacillus delbrueckii	0.413565	0.330852	0.496278	0.27571	0.220568	0.220568	0.468707	0.468707	0.165426	0.165426	0.578991	0.634133		OTU034	Bacteria; Bacteroidetes; Bacteroidia; Bacteroidales; Prevotellaceae; Prevotella; Prevotella nigrescens	0.703654	0.703654	0.243572	0.433018	0.37889	0.405954	0.216509	0.216509	0.351827	0.514208	0.189445	0.216509		OTU0034	Bacteria; Bacteroidetes; Bacteroidia; Bacteroidales; Prevotellaceae; Prevotella; Prevotella nigrescens	0.600171	1.00029	0.257216	0.228637	0.257216	0.400114	0.200057	0.228637	0.428694	0.428694	0.200057	0.171478		OTU034	Bacteria; Firmicutes; Clostridia; Clostridiales; Veillonellaceae; Selenomonas; unclassified	0	0	0
OTU035	Bacteria; Fusobacteria; Fusobacteria; Fusobacteriales; Fusobacteriaceae; Leptotrichia; unclassified	0.578991	0.744417	0.634133	0.385994	0.55142	0.716846	0.165426	0.110284	0.137855	0.137855	0.082713	0.027571		OTU035	Bacteria; Firmicutes; Clostridia; Clostridiales; Veillonellaceae; Veillonella; unclassified	0.216509	0.541272	0.37889	0.622463	0.703654	0.97429	0.243572	0.135318	0.324763	0.189445	0.108254	0.108254		OTU0035	Bacteria; Fusobacteria; Fusobacteria; Fusobacteriales; Fusobacteriaceae; Leptotrichia; unclassified	0.600171	0.657331	0.657331	0.543012	0.571592	0.571592	0.200057	0.114318	0.171478	0.142898	0.114318	0.0285796		OTU035	Bacteria; Firmicutes; Clostridia; Clostridiales; Veillonellaceae; Selenomonas; unclassified	0	0	0
OTU036	Bacteria; Bacteroidetes; Bacteroidia; Bacteroidales; Prevotellaceae; Prevotella; Prevotella nigrescens	0.578991	0.661704	0.248139	0.303281	0.358423	0.358423	0.192997	0.220568	0.441136	0.330852	0.303281	0.248139		OTU036	Bacteria; Bacteroidetes; Bacteroidia; Bacteroidales; Porphyromonadaceae; Porphyromonas; unclassified	0.243572	0.433018	0.649526	0.243572	0.405954	0.487145	0.189445	0.433018	0.2977	0.433018	0.189445	0.405954		OTU0036	Bacteria; Bacteroidetes; Bacteroidia; Bacteroidales; Prevotellaceae; Prevotella; Prevotella oris	0.285796	0.371535	0.142898	0.257216	0.200057	0.314376	0.485853	0.571592	0.800229	0.314376	0.200057	0.342955		OTU036	Bacteria; Tenericutes; Mollicutes; Mycoplasmatales; Mycoplasmataceae; Mycoplasma; unclassified	0.027571	0.027571	0.055142
OTU037	Bacteria; Firmicutes; Bacilli; Lactobacillales; Streptococcaceae; Streptococcus; unclassified	0	0	0.082713	1.37855	0.082713	1.29584	0	0	0	0	1.37855	0		OTU037	Bacteria; Firmicutes; Bacilli; Lactobacillales; Lactobacillaceae; Lactobacillus; Lactobacillus delbrueckii	0.460081	0.2977	0.487145	0.189445	0.270636	0.243572	0.433018	0.487145	0.243572	0.216509	0.324763	0.703654		OTU0037	Bacteria; Firmicutes; Clostridia; Clostridiales; Peptostreptococcaceae; Peptostreptococcus; unclassified	0.628751	0.600171	0.514433	0.657331	0.400114	0.600171	0.0571592	0.228637	0.0571592	0.114318	0.114318	0.0857388		OTU037	Bacteria; Firmicutes; Bacilli; Lactobacillales; Aerococcaceae; Abiotrophia; Abiotrophia defectiva	0.27571	0.220568	0.468707
OTU038	Bacteria; Fusobacteria; Fusobacteria; Fusobacteriales; Fusobacteriaceae; Leptotrichia; unclassified	0.385994	0.578991	0.578991	0.468707	0.661704	0.689275	0.165426	0.165426	0.082713	0.110284	0.082713	0.082713		OTU038	Bacteria; Bacteroidetes; Bacteroidia; Bacteroidales; Prevotellaceae; Prevotella; Prevotella oris	0.270636	0.351827	0.135318	0.2977	0.189445	0.324763	0.405954	0.568336	0.811908	0.2977	0.2977	0.270636		OTU0038	Bacteria; Firmicutes; Bacilli; Lactobacillales; Streptococcaceae; Streptococcus; unclassified	0	0	0.0857388	1.14318	0.0857388	1.34324	0.0285796	0	0	0	1.37182	0		OTU038	Bacteria; Firmicutes; Bacilli; Gemellales; Gemellaceae; Gemella; unclassified	5.15578	5.7072	5.76234
OTU039	Bacteria; Bacteroidetes; Bacteroidia; Bacteroidales; Prevotellaceae; Prevotella; Prevotella oris	0.27571	0.303281	0.137855	0.358423	0.055142	0.330852	0.523849	0.523849	0.634133	0.330852	0.165426	0.248139		OTU039	Bacteria; Firmicutes; Bacilli; Lactobacillales; Streptococcaceae; Streptococcus; unclassified	0	0	0.0811908	1.38024	0.0811908	1.08254	0.0270636	0	0	0.0270636	1.38024	0.0270636		OTU0039	Bacteria; Firmicutes; Clostridia; Clostridiales; Lachnospiraceae; unclassified; unclassified	0.71449	0.428694	0.342955	0.457274	0.571592	0.600171	0.114318	0.171478	0.285796	0.171478	0.0571592	0.0857388		OTU039	Bacteria; Firmicutes; Bacilli; Lactobacillales; Lactobacillaceae; Lactobacillus; Lactobacillus delbrueckii	0.413565	0.330852	0.496278
OTU040	Bacteria; TM7; TM7-3; I025; Rs-045; unclassified; unclassified	0.110284	0.248139	0.27571	0.137855	0.110284	0.27571	0.578991	0.27571	0.496278	0.358423	0.523849	0.441136		OTU040	Bacteria; Firmicutes; Clostridia; Clostridiales; Peptostreptococcaceae; Peptostreptococcus; unclassified	0.568336	0.460081	0.487145	0.568336	0.622463	0.487145	0.0811908	0.189445	0.108254	0.162382	0.162382	0.135318		OTU0040	Bacteria; Bacteroidetes; Bacteroidia; Bacteroidales; Prevotellaceae; Prevotella; unclassified	0.0571592	0.485853	0.142898	0.285796	0.285796	0.371535	0.314376	0.371535	0.428694	0.285796	0.371535	0.428694		OTU040	Bacteria; Firmicutes; Bacilli; Lactobacillales; Carnobacteriaceae; Granulicatella; Granulicatella adiacens	0.55142	0.523849	0.468707
OTU041	Bacteria; Bacteroidetes; Bacteroidia; Bacteroidales; Prevotellaceae; Prevotella; unclassified	0.110284	0.496278	0.137855	0.137855	0.220568	0.303281	0.303281	0.441136	0.385994	0.220568	0.441136	0.441136		OTU041	Bacteria; Fusobacteria; Fusobacteria; Fusobacteriales; Fusobacteriaceae; Leptotrichia; unclassified	0.541272	0.622463	0.622463	0.433018	0.568336	0.541272	0.189445	0.108254	0.216509	0.0541272	0.0811908	0.0270636		OTU0041	Bacteria; TM7; TM7-3; I025; Rs-045; unclassified; unclassified	0.0857388	0.228637	0.285796	0.0571592	0.171478	0.200057	0.571592	0.314376	0.400114	0.457274	0.600171	0.342955		OTU041	Bacteria; Spirochaetes; Spirochaetes; Spirochaetales; Spirochaetaceae; Treponema; unclassified	0	0.082713	0
OTU042	Bacteria; Firmicutes; Clostridia; Clostridiales; Lachnospiraceae; unclassified; unclassified	0.661704	0.441136	0.330852	0.413565	0.385994	0.523849	0.137855	0.192997	0.165426	0.165426	0.082713	0.082713		OTU042	Bacteria; Fusobacteria; Fusobacteria; Fusobacteriales; Fusobacteriaceae; Leptotrichia; unclassified	0.37889	0.541272	0.568336	0.568336	0.703654	0.460081	0.108254	0.162382	0.0270636	0.108254	0.0541272	0.108254		OTU0042	Bacteria; TM7; TM7-3; CW040; F16; unclassified; unclassified	0.285796	0.228637	0.200057	0.257216	0.0857388	0.342955	0.342955	0.400114	0.342955	0.342955	0.457274	0.371535		OTU042	Bacteria; Firmicutes; Bacilli; Lactobacillales; Carnobacteriaceae; Granulicatella; Granulicatella elegans	0	0	0.027571
OTU043	Bacteria; Firmicutes; Clostridia; Clostridiales; Peptostreptococcaceae; Peptostreptococcus; unclassified	0.578991	0.27571	0.496278	0.496278	0.385994	0.578991	0.055142	0.220568	0.055142	0.165426	0.137855	0.055142		OTU043	Bacteria; Bacteroidetes; Bacteroidia; Bacteroidales; Prevotellaceae; Prevotella; unclassified	0.0811908	0.487145	0.135318	0.162382	0.162382	0.351827	0.487145	0.405954	0.324763	0.2977	0.405954	0.405954		OTU0043	Bacteria; Firmicutes; Bacilli; Lactobacillales; Streptococcaceae; Streptococcus; Streptococcus oralis	0.628751	0.457274	0.228637	0.285796	0.257216	0.571592	0.200057	0.257216	0.0857388	0.257216	0.200057	0.114318		OTU043	Bacteria; Firmicutes; Bacilli; Lactobacillales; Streptococcaceae; Streptococcus; Streptococcus anginosus	0.27571	0.192997	0.385994
OTU044	Bacteria; Fusobacteria; Fusobacteria; Fusobacteriales; Fusobacteriaceae; Fusobacterium; unclassified	0	1.81969	1.46126	0.027571	0.027571	0	0	0	0.055142	0	0	0		OTU044	Bacteria; TM7; TM7-3; I025; Rs-045; unclassified; unclassified	0.0811908	0.2977	0.270636	0.189445	0.135318	0.135318	0.541272	0.2977	0.37889	0.324763	0.568336	0.460081		OTU0044	Bacteria; Bacteroidetes; Bacteroidia; Bacteroidales; Prevotellaceae; Prevotella; Prevotella melaninogenica	0.228637	0.342955	0.114318	0.400114	0.71449	0.228637	0.543012	0.257216	0.200057	0.114318	0.0571592	0.228637		OTU044	Bacteria; Firmicutes; Bacilli; Lactobacillales; Streptococcaceae; Streptococcus; unclassified	0.027571	1.9024	2.48139
OTU045	Bacteria; TM7; TM7-3; CW040; F16; unclassified; unclassified	0.248139	0.192997	0.192997	0.358423	0.055142	0.137855	0.441136	0.385994	0.27571	0.248139	0.413565	0.385994		OTU045	Bacteria; Firmicutes; Clostridia; Clostridiales; Lachnospiraceae; unclassified; unclassified	0.67659	0.433018	0.324763	0.324763	0.37889	0.487145	0.135318	0.162382	0.243572	0.189445	0.108254	0.108254		OTU0045	Bacteria; Proteobacteria; Betaproteobacteria; Neisseriales; Neisseriaceae; Neisseria; unclassified	0.257216	0.257216	0.342955	0.171478	0.228637	0.142898	0.314376	0.485853	0.200057	0.342955	0.200057	0.314376		OTU045	Bacteria; Spirochaetes; Spirochaetes; Spirochaetales; Spirochaetaceae; Treponema; Treponema socranskii	0	0	0.027571
OTU046	Bacteria; Bacteroidetes; Bacteroidia; Bacteroidales; Prevotellaceae; Prevotella; Prevotella melaninogenica	0.220568	0.248139	0.110284	0.413565	0.634133	0.248139	0.413565	0.303281	0.248139	0.192997	0.110284	0.137855		OTU046	Bacteria; TM7; TM7-3; CW040; F16; unclassified; unclassified	0.243572	0.216509	0.189445	0.270636	0.0270636	0.270636	0.487145	0.351827	0.37889	0.405954	0.2977	0.37889		OTU0046	Bacteria; Firmicutes; Bacilli; Lactobacillales; Streptococcaceae; Streptococcus; unclassified	0.200057	0.571592	0.171478	0.285796	0.543012	0.285796	0.142898	0.0285796	0.0285796	0	0.371535	0.200057		OTU046	Bacteria; Firmicutes; Bacilli; Lactobacillales; Streptococcaceae; Streptococcus; Streptococcus sanguinis	0.634133	0.578991	0.468707
OTU047	Bacteria; Tenericutes; Mollicutes; RF39; unclassified; unclassified; unclassified	0.248139	0.082713	0.055142	0.165426	0.137855	0.165426	0.413565	0.468707	0.385994	0.441136	0.358423	0.192997		OTU047	Bacteria; Bacteroidetes; Bacteroidia; Bacteroidales; Prevotellaceae; Prevotella; Prevotella melaninogenica	0.216509	0.243572	0.108254	0.351827	0.703654	0.37889	0.324763	0.324763	0.243572	0.216509	0.108254	0.162382		OTU0047	Bacteria; Bacteroidetes; Flavobacteria; Flavobacteriales; Flavobacteriaceae; Capnocytophaga; unclassified	0.257216	0.314376	0.0857388	0.257216	0.0571592	0.228637	0.257216	0.285796	0.0571592	0.200057	0.371535	0.400114		OTU047	Bacteria; Firmicutes; Clostridia; Clostridiales; Veillonellaceae; Selenomonas; unclassified	0	0	0
OTU048	Bacteria; Firmicutes; Bacilli; Lactobacillales; Streptococcaceae; Streptococcus; Streptococcus oralis	0.27571	0.27571	0.55142	0.496278	0.330852	0.248139	0.055142	0.303281	0.055142	0.248139	0.165426	0.082713		OTU048	Bacteria; Proteobacteria; Betaproteobacteria; Neisseriales; Neisseriaceae; Neisseria; unclassified	0.243572	0.189445	0.324763	0.189445	0.37889	0.189445	0.216509	0.487145	0.351827	0.270636	0.135318	0.162382		OTU0048	Bacteria; Firmicutes; Clostridia; Clostridiales; Lachnospiraceae; Oribacterium; unclassified	0.428694	0.171478	0.257216	0.200057	0.171478	0.257216	0.200057	0.257216	0.200057	0.142898	0.142898	0.257216		OTU048	Bacteria; Spirochaetes; Spirochaetes; Spirochaetales; Spirochaetaceae; Treponema; unclassified	0	0	0
OTU049	Bacteria; Proteobacteria; Betaproteobacteria; Neisseriales; Neisseriaceae; Neisseria; unclassified	0.192997	0.110284	0.330852	0.165426	0.303281	0.220568	0.303281	0.413565	0.192997	0.27571	0.137855	0.220568		OTU049	Bacteria; Tenericutes; Mollicutes; RF39; unclassified; unclassified; unclassified	0.216509	0.0811908	0.0541272	0.162382	0.108254	0.351827	0.324763	0.433018	0.270636	0.351827	0.216509	0.189445		OTU0049	Bacteria; Firmicutes; Bacilli; Lactobacillales; Carnobacteriaceae; Granulicatella; Granulicatella adiacens	0.485853	0.428694	0.485853	0.371535	0.114318	0.257216	0.0571592	0.0857388	0.0285796	0.0857388	0.114318	0.142898		OTU049	Bacteria; Spirochaetes; Spirochaetes; Spirochaetales; Spirochaetaceae; Treponema; Treponema socranskii	0.027571	0	0
OTU050	Bacteria; Firmicutes; Bacilli; Lactobacillales; Carnobacteriaceae; Granulicatella; Granulicatella adiacens	0.468707	0.523849	0.468707	0.330852	0.192997	0.303281	0.055142	0.082713	0.055142	0.082713	0.055142	0.055142		OTU050	Bacteria; Bacteroidetes; Bacteroidia; Bacteroidales; Porphyromonadaceae; Porphyromonas; unclassified	0.162382	0.405954	0.216509	0.2977	0.2977	0.324763	0.216509	0.0270636	0.162382	0.162382	0.0811908	0.243572		OTU0050	Bacteria; Bacteroidetes; Flavobacteria; Flavobacteriales; Flavobacteriaceae; Chryseobacterium; unclassified	0.228637	0.171478	0.171478	0.171478	0.200057	0.171478	0.171478	0.371535	0.0571592	0.342955	0.200057	0.228637		OTU050	Bacteria; Spirochaetes; Spirochaetes; Spirochaetales; Spirochaetaceae; Treponema; Treponema socranskii	0	0.027571	0
OTU051	Bacteria; Firmicutes; Bacilli; Lactobacillales; Streptococcaceae; Streptococcus; unclassified	0.137855	0.413565	0.165426	0.27571	0.496278	0.413565	0.137855	0.055142	0.055142	0	0.220568	0.220568		OTU051	Bacteria; Firmicutes; Bacilli; Lactobacillales; Carnobacteriaceae; Granulicatella; Granulicatella adiacens	0.460081	0.405954	0.460081	0.405954	0.162382	0.2977	0.0270636	0.0541272	0.0811908	0.0811908	0.0811908	0.0541272		OTU0051	Bacteria; unclassified; unclassified; unclassified; unclassified; unclassified; unclassified	0.114318	0.0571592	0.114318	0.0857388	0.0857388	0.0285796	0.228637	0.342955	0.200057	0.371535	0.428694	0.285796		OTU051	Bacteria; Firmicutes; Bacilli; Lactobacillales; Streptococcaceae; Streptococcus; Streptococcus constellatus	0.27571	0.192997	0.303281
OTU052	Bacteria; Firmicutes; Clostridia; Clostridiales; Lachnospiraceae; Oribacterium; unclassified	0.385994	0.220568	0.248139	0.192997	0.082713	0.330852	0.137855	0.248139	0.192997	0.165426	0.110284	0.192997		OTU052	Bacteria; Bacteroidetes; Flavobacteria; Flavobacteriales; Flavobacteriaceae; unclassified; unclassified	0.243572	0.216509	0.162382	0.162382	0.243572	0.189445	0.162382	0.351827	0.108254	0.270636	0.189445	0.162382		OTU0052	Bacteria; Firmicutes; Clostridia; Clostridiales; Eubacteriaceae; Eubacterium; Eubacterium yuri	0.228637	0.0857388	0.0857388	0.171478	0.0571592	0	0.285796	0.285796	0.171478	0.200057	0.371535	0.285796		OTU052	Bacteria; Firmicutes; Bacilli; Lactobacillales; Streptococcaceae; Streptococcus; unclassified	5.59691	5.21092	5.29363
OTU053	Bacteria; Bacteroidetes; Flavobacteria; Flavobacteriales; Flavobacteriaceae; Capnocytophaga; unclassified	0.248139	0.27571	0.082713	0.165426	0.110284	0.303281	0.303281	0.303281	0.110284	0.165426	0.192997	0.248139		OTU053	Bacteria; Firmicutes; Clostridia; Clostridiales; Lachnospiraceae; Oribacterium; unclassified	0.405954	0.189445	0.243572	0.243572	0.162382	0.135318	0.162382	0.243572	0.162382	0.108254	0.0811908	0.324763		OTU0053	Bacteria; Proteobacteria; Gammaproteobacteria; Pasteurellales; Pasteurellaceae; Haemophilus; Haemophilus parainfluenzae	0.171478	0.400114	0.200057	0.200057	0.457274	0.285796	0.0857388	0.171478	0	0.114318	0.0571592	0.0571592		OTU053	Bacteria; Firmicutes; Bacilli; Lactobacillales; Streptococcaceae; Streptococcus; unclassified	1.62669	1.68183	1.62669
OTU054	Bacteria; Bacteroidetes; Bacteroidia; Bacteroidales; Prevotellaceae; Prevotella; unclassified	0.165426	0.330852	0.192997	0.385994	0.27571	0.303281	0.110284	0.137855	0.248139	0.192997	0.055142	0.110284		OTU054	Bacteria; Firmicutes; Bacilli; Lactobacillales; Streptococcaceae; Streptococcus; unclassified	0.135318	0.351827	0.162382	0.189445	0.460081	0.351827	0.135318	0.0541272	0.0541272	0.0270636	0.324763	0.162382		OTU0054	Bacteria; Bacteroidetes; Bacteroidia; Bacteroidales; Prevotellaceae; Prevotella; unclassified	0.171478	0.257216	0.200057	0.314376	0.200057	0.228637	0.228637	0.114318	0.114318	0.142898	0.0857388	0.142898		OTU054	Bacteria; Firmicutes; Bacilli; Lactobacillales; Streptococcaceae; Streptococcus; unclassified	1.9024	0	0
OTU055	Bacteria; Bacteroidetes; Flavobacteria; Flavobacteriales; Flavobacteriaceae; unclassified; unclassified	0.192997	0.165426	0.165426	0.137855	0.192997	0.137855	0.082713	0.330852	0.165426	0.385994	0.165426	0.27571		OTU055	Bacteria; Firmicutes; Bacilli; Lactobacillales; Streptococcaceae; Streptococcus; Streptococcus oralis	0.405954	0.270636	0.162382	0.37889	0.216509	0.324763	0.0541272	0.108254	0.0811908	0.0270636	0.162382	0.108254		OTU0055	Bacteria; Firmicutes; Clostridia; Clostridiales; Lachnospiraceae; Catonella; unclassified	0.114318	0.171478	0.257216	0.171478	0.257216	0.0857388	0.257216	0.142898	0.0857388	0.114318	0.314376	0.200057		OTU055	Bacteria; Firmicutes; Bacilli; Lactobacillales; Streptococcaceae; Streptococcus; unclassified	0.110284	0.082713	0.137855
OTU056	Bacteria; Proteobacteria; Gammaproteobacteria; Pasteurellales; Pasteurellaceae; Haemophilus; Haemophilus parainfluenzae	0.165426	0.441136	0.192997	0.192997	0.27571	0.248139	0.110284	0.165426	0.192997	0.137855	0.055142	0.055142		OTU056	Bacteria; Fusobacteria; Fusobacteria; Fusobacteriales; Fusobacteriaceae; Leptotrichia; unclassified	0.37889	0.568336	0.243572	0.2977	0.189445	0.216509	0.0541272	0.108254	0.0811908	0.0541272	0.0270636	0.0270636		OTU0056	Bacteria; Spirochaetes; Spirochaetes; Spirochaetales; Spirochaetaceae; Treponema; Treponema lecithinolyticum	0.0285796	0	0.0857388	0.0571592	0.0285796	0.142898	0.0571592	0.0285796	0.771649	0.485853	0.257216	0.200057		OTU056	Bacteria; Firmicutes; Bacilli; Lactobacillales; Streptococcaceae; Lactococcus; unclassified	0	0	0.027571
OTU057	Bacteria; Fusobacteria; Fusobacteria; Fusobacteriales; Fusobacteriaceae; Leptotrichia; unclassified	0.330852	0.441136	0.248139	0.330852	0.27571	0.303281	0	0.110284	0.082713	0.055142	0	0.055142		OTU057	Bacteria; Bacteroidetes; Flavobacteria; Flavobacteriales; Flavobacteriaceae; Capnocytophaga; unclassified	0.162382	0.243572	0.0811908	0.216509	0.0811908	0.189445	0.162382	0.270636	0.108254	0.189445	0.324763	0.216509		OTU0057	Bacteria; Firmicutes; Bacilli; Lactobacillales; Streptococcaceae; Streptococcus; Streptococcus anginosus	0.257216	0.228637	0.400114	0.314376	0.200057	0.228637	0.0571592	0.0571592	0.0857388	0.114318	0.0285796	0.114318		OTU057	Bacteria; Firmicutes; Bacilli; Gemellales; Gemellaceae; Gemella; unclassified	0.027571	0.055142	0.055142
OTU058	Bacteria; unclassified; unclassified; unclassified; unclassified; unclassified; unclassified	0.137855	0.110284	0.110284	0.082713	0.027571	0.110284	0.192997	0.303281	0.137855	0.385994	0.330852	0.27571		OTU058	Bacteria; Proteobacteria; Gammaproteobacteria; Pasteurellales; Pasteurellaceae; Haemophilus; Haemophilus parainfluenzae	0.108254	0.2977	0.189445	0.351827	0.405954	0.270636	0.0270636	0.162382	0.135318	0.108254	0.0270636	0.135318		OTU0058	Bacteria; Fusobacteria; Fusobacteria; Fusobacteriales; Fusobacteriaceae; Leptotrichia; unclassified	0.342955	0.428694	0.257216	0.171478	0.285796	0.285796	0.0571592	0.0857388	0.0571592	0.0285796	0	0		OTU058	Bacteria; Firmicutes; Bacilli; Lactobacillales; Streptococcaceae; Streptococcus; Streptococcus sanguinis	0	0.027571	0.027571
OTU059	Bacteria; Firmicutes; Clostridia; Clostridiales; Lachnospiraceae; Catonella; unclassified	0.137855	0.110284	0.248139	0.192997	0.248139	0.165426	0.27571	0.137855	0.082713	0.055142	0.27571	0.165426		OTU059	Bacteria; Fusobacteria; Fusobacteria; Fusobacteriales; Fusobacteriaceae; Fusobacterium; unclassified	0.216509	0.243572	0.162382	0.135318	0.0811908	0.0541272	0.108254	0.216509	0.351827	0.189445	0.324763	0.135318		OTU0059	Bacteria; Fusobacteria; Fusobacteria; Fusobacteriales; Fusobacteriaceae; Fusobacterium; unclassified	0.200057	0.257216	0.171478	0.114318	0	0	0.171478	0.257216	0.200057	0.257216	0.257216	0.114318		OTU059	Bacteria; Spirochaetes; Spirochaetes; Spirochaetales; Spirochaetaceae; Treponema; Treponema lecithinolyticum	0	0	0
OTU060	Bacteria; Spirochaetes; Spirochaetes; Spirochaetales; Spirochaetaceae; Treponema; Treponema lecithinolyticum	0.027571	0.082713	0.082713	0	0	0.110284	0.082713	0.082713	0.82713	0.385994	0.082713	0.220568		OTU060	Bacteria; unclassified; unclassified; unclassified; unclassified; unclassified; unclassified	0.135318	0.0541272	0.108254	0.189445	0.0811908	0.108254	0.162382	0.270636	0.135318	0.37889	0.324763	0.216509		OTU0060	Bacteria; Bacteroidetes; Bacteroidia; Bacteroidales; Porphyromonadaceae; Tannerella; Tannerella forsythia	0	0.0857388	0	0.0285796	0.0285796	0	0.142898	0.0285796	1.17176	0.371535	0.0571592	0.0285796		OTU060	Bacteria; Spirochaetes; Spirochaetes; Spirochaetales; Spirochaetaceae; Treponema; unclassified	0	0	0
OTU061	Bacteria; Firmicutes; Bacilli; Lactobacillales; Streptococcaceae; Streptococcus; Streptococcus anginosus	0.27571	0.192997	0.385994	0.248139	0.27571	0.192997	0.082713	0.027571	0.137855	0.110284	0.027571	0.027571		OTU061	Bacteria; Firmicutes; Clostridia; Clostridiales; Lachnospiraceae; Clostridium; unclassified	0.0541272	0.216509	0.162382	0.189445	0.243572	0.216509	0.162382	0.0541272	0.216509	0.189445	0.216509	0.216509		OTU0061	Bacteria; Firmicutes; Clostridia; Clostridiales; unclassified; unclassified; unclassified	0.0571592	0.142898	0.0857388	0.228637	0	0.171478	0	0.114318	0.457274	0.228637	0.142898	0.285796		OTU061	Bacteria; Firmicutes; Bacilli; Bacillales; Staphylococcaceae; Staphylococcus; unclassified	0	0	0
OTU062	Bacteria; Firmicutes; Bacilli; Lactobacillales; Streptococcaceae; Streptococcus; Streptococcus oralis	0.330852	0.192997	0.165426	0.358423	0.192997	0.303281	0.055142	0.082713	0.055142	0.055142	0.082713	0.082713		OTU062	Bacteria; Firmicutes; Clostridia; Clostridiales; Lachnospiraceae; Catonella; unclassified	0.108254	0.216509	0.243572	0.108254	0.216509	0.108254	0.2977	0.135318	0.162382	0.162382	0.270636	0.108254		OTU0062	Bacteria; Firmicutes; Bacilli; Lactobacillales; Streptococcaceae; Streptococcus; Streptococcus oralis	0.400114	0.228637	0.171478	0.371535	0.0285796	0.371535	0.0571592	0.0571592	0.0571592	0	0.0857388	0.0285796		OTU062	Bacteria; Spirochaetes; Spirochaetes; Spirochaetales; Spirochaetaceae; Treponema; unclassified	0	0	0
OTU063	Bacteria; Firmicutes; Clostridia; Clostridiales; Lachnospiraceae; Clostridium; unclassified	0.082713	0.055142	0.165426	0.110284	0.137855	0.220568	0.165426	0.055142	0.330852	0.165426	0.248139	0.192997		OTU063	Bacteria; Bacteroidetes; Bacteroidia; Bacteroidales; Prevotellaceae; Prevotella; unclassified	0.216509	0.216509	0.189445	0.243572	0.216509	0.135318	0.162382	0.135318	0.135318	0.189445	0	0.135318		OTU0063	Bacteria; Firmicutes; Bacilli; Lactobacillales; Streptococcaceae; Streptococcus; Streptococcus constellatus	0.285796	0.142898	0.314376	0.314376	0.142898	0.371535	0.142898	0	0.0285796	0.0571592	0.0571592	0		OTU063	Bacteria; Spirochaetes; Spirochaetes; Spirochaetales; Spirochaetaceae; Treponema; Treponema lecithinolyticum	0.027571	0.082713	0.110284
OTU064	Bacteria; Firmicutes; Clostridia; Clostridiales; Eubacteriaceae; Eubacterium; Eubacterium yuri	0.220568	0.055142	0.082713	0.082713	0.110284	0.082713	0.27571	0.303281	0.137855	0.248139	0.165426	0.165426		OTU064	Bacteria; Firmicutes; Clostridia; Clostridiales; Eubacteriaceae; Eubacterium; Eubacterium yuri	0.189445	0.0541272	0.0811908	0.108254	0.0811908	0.108254	0.270636	0.270636	0.216509	0.162382	0.216509	0.216509		OTU0064	Bacteria; Bacteroidetes; Bacteroidia; Bacteroidales; Porphyromonadaceae; Porphyromonas; Porphyromonas endodontalis	0.0571592	0.114318	0	0.200057	0.0285796	0.0857388	0.0285796	0.142898	0.514433	0.314376	0.0857388	0.228637		OTU064	Bacteria; Firmicutes; Bacilli; Gemellales; Gemellaceae; Gemella; unclassified	0.027571	0	0
OTU065	Bacteria; Firmicutes; Clostridia; Clostridiales; unclassified; unclassified; unclassified	0.082713	0.055142	0.082713	0.137855	0.027571	0.220568	0.110284	0.137855	0.413565	0.303281	0.165426	0.165426		OTU065	Bacteria; Bacteroidetes; Bacteroidia; Bacteroidales; Porphyromonadaceae; Porphyromonas; Porphyromonas endodontalis	0.0811908	0.108254	0	0.0811908	0	0.135318	0.0270636	0.162382	0.703654	0.351827	0.108254	0.189445		OTU0065	Bacteria; Firmicutes; Bacilli; Lactobacillales; Aerococcaceae; Abiotrophia; Abiotrophia defectiva	0.285796	0.114318	0.485853	0.0857388	0.285796	0.114318	0.0857388	0.0571592	0.0285796	0.114318	0.0857388	0		OTU065	Bacteria; Firmicutes; Bacilli; Lactobacillales; Streptococcaceae; Streptococcus; Streptococcus thermophilus	0	0.027571	0
OTU066	Bacteria; Proteobacteria; Betaproteobacteria; Neisseriales; Neisseriaceae; Neisseria; unclassified	0	0.303281	0.055142	0.468707	0.027571	0.385994	0.110284	0.110284	0.165426	0.137855	0	0.110284		OTU066	Bacteria; Firmicutes; Bacilli; Lactobacillales; Aerococcaceae; Abiotrophia; Abiotrophia defectiva	0.2977	0.189445	0.460081	0.135318	0.216509	0.162382	0.0811908	0.0270636	0.0541272	0.0541272	0.0270636	0.0811908		OTU0066	Bacteria; Bacteroidetes; Bacteroidia; Bacteroidales; Prevotellaceae; Prevotella; unclassified	0.171478	0.142898	0.257216	0.0857388	0.200057	0.171478	0.0285796	0.0857388	0.0857388	0.0571592	0.200057	0.142898		OTU066	Bacteria; Firmicutes; Bacilli; Lactobacillales; Streptococcaceae; Streptococcus; Streptococcus anginosus	0	0	0
OTU067	Bacteria; Bacteroidetes; Bacteroidia; Bacteroidales; Porphyromonadaceae; Porphyromonas; Porphyromonas endodontalis	0.082713	0.165426	0	0.110284	0	0.137855	0.055142	0.137855	0.689275	0.27571	0.055142	0.165426		OTU067	Bacteria; Firmicutes; Clostridia; Clostridiales; unclassified; unclassified; unclassified	0.0541272	0.108254	0.0811908	0.0541272	0.0811908	0.162382	0.108254	0.0811908	0.460081	0.216509	0.162382	0.189445		OTU0067	Bacteria; Bacteroidetes; Bacteroidia; Bacteroidales; Prevotellaceae; Prevotella; unclassified	0.171478	0.142898	0.0857388	0.0857388	0.114318	0.0571592	0.171478	0.171478	0.171478	0.171478	0.228637	0.0571592		OTU067	Bacteria; Firmicutes; Bacilli; Lactobacillales; Streptococcaceae; Streptococcus; Streptococcus oralis	0	0	0
OTU068	Bacteria; Fusobacteria; Fusobacteria; Fusobacteriales; Fusobacteriaceae; Fusobacterium; unclassified	0.220568	0.137855	0.137855	0.055142	0.055142	0.055142	0.192997	0.192997	0.137855	0.248139	0.137855	0.192997		OTU068	Bacteria; Bacteroidetes; Bacteroidia; Bacteroidales; Prevotellaceae; Prevotella; unclassified	0.135318	0.216509	0.135318	0.324763	0.0811908	0.135318	0.0811908	0.162382	0.0270636	0.0811908	0.189445	0.162382		OTU0068	Bacteria; Synergistetes; Synergistia; Synergistales; Dethiosulfovibrionaceae; TG5; unclassified	0.0857388	0.0285796	0.0285796	0.0285796	0.0571592	0.0857388	0.114318	0.142898	0.228637	0.314376	0.257216	0.0571592		OTU068	Bacteria; Spirochaetes; Spirochaetes; Spirochaetales; Spirochaetaceae; Treponema; Treponema denticola	0	0.027571	0.027571
OTU069	Bacteria; Firmicutes; Bacilli; Lactobacillales; Streptococcaceae; Streptococcus; Streptococcus constellatus	0.27571	0.192997	0.303281	0.27571	0.110284	0.27571	0.110284	0	0.027571	0.055142	0.055142	0.055142		OTU069	Bacteria; Proteobacteria; Betaproteobacteria; unclassified; unclassified; unclassified; unclassified	0	0.189445	0.0541272	0.433018	0.135318	0.162382	0.0541272	0.189445	0.243572	0.135318	0.0270636	0.108254		OTU0069	Bacteria; Proteobacteria; Epsilonproteobacteria; Campylobacterales; Campylobacteraceae; Campylobacter; Campylobacter gracilis	0.0285796	0.114318	0.114318	0.0285796	0.0285796	0	0.200057	0.142898	0.200057	0.0857388	0.171478	0.257216		OTU069	Bacteria; Tenericutes; Erysipelotrichi; Erysipelotrichales; Erysipelotrichaceae; Clostridium; unclassified	0	0	0
OTU070	Bacteria; Firmicutes; Bacilli; Lactobacillales; Streptococcaceae; Streptococcus; unclassified	0.165426	0.165426	0.27571	0.220568	0.192997	0.055142	0.220568	0.055142	0.055142	0.082713	0.137855	0.082713		OTU070	Bacteria; Bacteroidetes; Bacteroidia; Bacteroidales; Porphyromonadaceae; Tannerella; Tannerella forsythia	0	0.0541272	0	0.0270636	0.0270636	0	0.135318	0.0270636	0.947226	0.37889	0.0541272	0.0541272		OTU0070	Bacteria; Proteobacteria; Gammaproteobacteria; Pasteurellales; Pasteurellaceae; Actinobacillus; Haemophilus parahaemolyticus	0.228637	0.171478	0.228637	0.171478	0.200057	0.228637	0.0571592	0.0857388	0	0	0	0		OTU070	Bacteria; Firmicutes; Bacilli; Lactobacillales; Streptococcaceae; Streptococcus; Streptococcus oralis	0	0	0
OTU071	Bacteria; Firmicutes; Bacilli; Lactobacillales; Aerococcaceae; Abiotrophia; Abiotrophia defectiva	0.248139	0.192997	0.468707	0.220568	0.192997	0.082713	0.027571	0.055142	0.055142	0.082713	0.055142	0.027571		OTU071	Bacteria; Firmicutes; Bacilli; Lactobacillales; Streptococcaceae; Streptococcus; unclassified	0.108254	0.0811908	0.2977	0.189445	0.0811908	0.108254	0.270636	0.0541272	0.108254	0.0811908	0.0811908	0.189445		OTU0071	Bacteria; TM7; TM7-3; EW055; unclassified; unclassified; unclassified	0	0.0571592	0.0285796	0	0.114318	0.0285796	0.285796	0.200057	0.200057	0.171478	0.114318	0.114318		OTU071	Bacteria; Firmicutes; Bacilli; Lactobacillales; Streptococcaceae; Streptococcus; Streptococcus pseudopneumoniae	0	0	0
OTU072	Bacteria; Bacteroidetes; Bacteroidia; Bacteroidales; Prevotellaceae; Prevotella; unclassified	0.192997	0.110284	0.082713	0.192997	0.055142	0.027571	0.220568	0.165426	0.165426	0.165426	0.192997	0.137855		OTU072	Bacteria; Firmicutes; Bacilli; Lactobacillales; Streptococcaceae; Streptococcus; Streptococcus anginosus	0.189445	0.189445	0.324763	0.135318	0.216509	0.243572	0.0541272	0.0541272	0.108254	0.0811908	0	0.0270636		OTU0072	Bacteria; Bacteroidetes; Bacteroidia; Bacteroidales; Porphyromonadaceae; Porphyromonas; unclassified	0.0285796	0.142898	0.114318	0.171478	0.171478	0.314376	0.0857388	0.0285796	0.0285796	0.0857388	0.0571592	0.0857388		OTU072	Bacteria; Firmicutes; Bacilli; Lactobacillales; Streptococcaceae; Streptococcus; Streptococcus oralis	0	0	0
OTU073	Bacteria; Proteobacteria; Betaproteobacteria; Neisseriales; Neisseriaceae; Neisseria; unclassified	0.027571	0.661704	0.055142	0.27571	0.165426	0.165426	0	0.055142	0.110284	0.110284	0.027571	0.027571		OTU073	Bacteria; Proteobacteria; Betaproteobacteria; Neisseriales; Neisseriaceae; Neisseria; unclassified	0	0.351827	0.0541272	0.405954	0	0.216509	0	0.0811908	0.0811908	0.162382	0.0541272	0.108254		OTU0073	Bacteria; Fusobacteria; Fusobacteria; Fusobacteriales; Fusobacteriaceae; Leptotrichia; unclassified	0.142898	0.0285796	0.142898	0.200057	0.171478	0.171478	0.0857388	0	0.0857388	0.0571592	0.142898	0.0285796		OTU073	Bacteria; Spirochaetes; Spirochaetes; Spirochaetales; Spirochaetaceae; Treponema; unclassified	0	0.027571	0
OTU074	Bacteria; Bacteroidetes; Bacteroidia; Bacteroidales; Prevotellaceae; Prevotella; unclassified	0.137855	0.110284	0.248139	0.055142	0.220568	0.110284	0.082713	0.082713	0.110284	0.055142	0.27571	0.110284		OTU074	Bacteria; Bacteroidetes; Bacteroidia; Bacteroidales; Prevotellaceae; Prevotella; unclassified	0.0541272	0.189445	0.0541272	0.0541272	0.162382	0.189445	0.135318	0.135318	0.108254	0.189445	0.189445	0.0270636		OTU0074	Bacteria; Proteobacteria; Gammaproteobacteria; Pasteurellales; Pasteurellaceae; Aggregatibacter; Aggregatibacter aphrophilus	0.0285796	0.0285796	0	0	0.0285796	0.0285796	0.228637	0.314376	0.142898	0.142898	0.142898	0.171478		OTU074	Bacteria; Firmicutes; Bacilli; Lactobacillales; Leuconostocaceae; Leuconostoc; unclassified	0	0	0.027571
OTU075	Bacteria; Bacteroidetes; Bacteroidia; Bacteroidales; Prevotellaceae; Prevotella; unclassified	0.082713	0.110284	0.055142	0.055142	0.165426	0.220568	0.110284	0.110284	0.192997	0.192997	0.137855	0.137855		OTU075	Bacteria; Spirochaetes; Spirochaetes; Spirochaetales; Spirochaetaceae; Treponema; Treponema lecithinolyticum	0.0270636	0.0270636	0.0811908	0	0	0.0811908	0.0541272	0.0811908	0.649526	0.324763	0.0811908	0.0811908		OTU0075	Bacteria; Proteobacteria; Betaproteobacteria; Neisseriales; Neisseriaceae; Neisseria; unclassified	0	0.285796	0.0857388	0.257216	0.0571592	0.314376	0.0285796	0	0.114318	0.0571592	0.0285796	0		OTU075	Bacteria; Spirochaetes; Spirochaetes; Spirochaetales; Spirochaetaceae; Treponema; Treponema amylovorum	0	0	0
OTU076	Bacteria; Bacteroidetes; Bacteroidia; Bacteroidales; Prevotellaceae; Prevotella; unclassified	0.110284	0.220568	0.137855	0.082713	0.055142	0.192997	0.055142	0.220568	0.055142	0.055142	0.165426	0.192997		OTU076	Bacteria; Bacteroidetes; Bacteroidia; Bacteroidales; Prevotellaceae; Prevotella; unclassified	0.162382	0.162382	0.0811908	0.135318	0.108254	0	0.135318	0.162382	0.162382	0.135318	0.108254	0.108254		OTU0076	Bacteria; Firmicutes; Clostridia; Clostridiales; Veillonellaceae; Selenomonas; unclassified	0.0857388	0.114318	0	0.0285796	0.114318	0.0285796	0.114318	0.114318	0.142898	0.200057	0.142898	0.114318		OTU076	Bacteria; Firmicutes; Bacilli; Bacillales; Bacillaceae; unclassified; unclassified	0.027571	0	0
OTU077	Bacteria; Firmicutes; Clostridia; Clostridiales; unclassified; unclassified; unclassified	0.192997	0.110284	0.137855	0.055142	0.027571	0.192997	0.137855	0.082713	0.165426	0.082713	0.27571	0.055142		OTU077	Bacteria; Firmicutes; Clostridia; Clostridiales; unclassified; unclassified; unclassified	0.108254	0.162382	0.135318	0.108254	0.0270636	0.108254	0.0811908	0.108254	0.135318	0.135318	0.243572	0.0811908		OTU0077	Bacteria; Spirochaetes; Spirochaetes; Spirochaetales; Spirochaetaceae; Treponema; unclassified	0.0285796	0.114318	0.0285796	0	0.0285796	0	0.0571592	0.200057	0.142898	0.171478	0.200057	0.228637		OTU077	Bacteria; Tenericutes; Mollicutes; Mycoplasmatales; Mycoplasmataceae; Mycoplasma; unclassified	0.027571	0.082713	0.027571
OTU078	Bacteria; Proteobacteria; Gammaproteobacteria; Pasteurellales; Pasteurellaceae; Haemophilus; Haemophilus parainfluenzae	0.110284	0.220568	0.082713	0.330852	0.137855	0.27571	0.055142	0.027571	0.027571	0.110284	0.082713	0.027571		OTU078	Bacteria; Bacteroidetes; Bacteroidia; Bacteroidales; Prevotellaceae; Prevotella; unclassified	0.162382	0.0811908	0.243572	0.0811908	0.162382	0.135318	0.0811908	0.0541272	0.0811908	0.0811908	0.189445	0.0541272		OTU0078	Bacteria; TM7; TM7-3; unclassified; unclassified; unclassified; unclassified	0.0285796	0.114318	0.114318	0.0285796	0.171478	0.171478	0	0.0285796	0.0285796	0.257216	0.114318	0.114318		OTU078	Bacteria; Spirochaetes; Spirochaetes; Spirochaetales; Spirochaetaceae; Treponema; unclassified	0.055142	0.027571	0.027571
OTU079	Bacteria; Proteobacteria; Epsilonproteobacteria; Campylobacterales; Campylobacteraceae; Campylobacter; Campylobacter gracilis	0.027571	0.110284	0.110284	0.027571	0.110284	0.027571	0.165426	0.082713	0.220568	0.165426	0.220568	0.192997		OTU079	Bacteria; Synergistetes; Synergistia; Synergistales; Dethiosulfovibrionaceae; TG5; unclassified	0.0541272	0.0270636	0.0270636	0.0541272	0.0270636	0.0270636	0.135318	0.135318	0.2977	0.351827	0.0811908	0.162382		OTU0079	Bacteria; Fusobacteria; Fusobacteria; Fusobacteriales; Fusobacteriaceae; Fusobacterium; unclassified	0	0.0857388	0.114318	0.0571592	0.0857388	0.0285796	0.0285796	0.114318	0.114318	0.171478	0.171478	0.200057		OTU079	Bacteria; Actinobacteria; Actinobacteria; Actinomycetales; Actinomycetaceae; Actinomyces; unclassified	0.055142	0	0
OTU080	Bacteria; Bacteroidetes; Bacteroidia; Bacteroidales; Porphyromonadaceae; Tannerella; Tannerella forsythia	0	0.027571	0	0	0.027571	0	0.165426	0.027571	0.771988	0.413565	0.027571	0		OTU080	Bacteria; Firmicutes; Clostridia; Clostridiales; Veillonellaceae; Selenomonas; unclassified	0.0811908	0.108254	0	0.0270636	0.108254	0.0270636	0.189445	0.135318	0.162382	0.108254	0.270636	0.162382		OTU0080	Bacteria; Proteobacteria; Gammaproteobacteria; Pasteurellales; Pasteurellaceae; Haemophilus; Haemophilus parainfluenzae	0.114318	0.142898	0.0857388	0.228637	0.142898	0.200057	0.0285796	0	0	0.0857388	0.0571592	0.0571592		OTU080	Bacteria; Firmicutes; Clostridia; Clostridiales; Eubacteriaceae; Eubacterium; Eubacterium yuri	0	0	0
OTU081	Bacteria; Bacteroidetes; Bacteroidia; Bacteroidales; Porphyromonadaceae; Porphyromonas; unclassified	0	0	0.992556	0	0	0	0	0	0	0	0.441136	0		OTU081	Bacteria; TM7; TM7-3; unclassified; unclassified; unclassified; unclassified	0.0541272	0.2977	0.108254	0.0811908	0.135318	0.108254	0	0.0270636	0.108254	0.162382	0.108254	0.162382		OTU0081	Bacteria; Firmicutes; Bacilli; Lactobacillales; Streptococcaceae; Streptococcus; unclassified	0.114318	0.0857388	0.200057	0.142898	0.171478	0.114318	0.0285796	0.0285796	0.0857388	0.0285796	0	0.114318		OTU081	Bacteria; Proteobacteria; Betaproteobacteria; Neisseriales; Neisseriaceae; Simonsiella; Simonsiella muelleri	0.055142	0.055142	0
OTU082	Bacteria; TM7; TM7-3; EW055; unclassified; unclassified; unclassified	0	0.110284	0.027571	0	0.082713	0.027571	0.220568	0.165426	0.192997	0.303281	0.165426	0.055142		OTU082	Bacteria; Proteobacteria; Gammaproteobacteria; Pasteurellales; Pasteurellaceae; Actinobacillus; Haemophilus parahaemolyticus	0.216509	0.216509	0.216509	0.135318	0.216509	0.135318	0.0270636	0.0541272	0.0270636	0	0.0541272	0		OTU0082	Bacteria; Bacteroidetes; Bacteroidia; Bacteroidales; Prevotellaceae; Prevotella; unclassified	0.0857388	0.171478	0.142898	0.171478	0	0.114318	0	0.114318	0.0285796	0.0285796	0.114318	0.142898		OTU082	Bacteria; Bacteroidetes; Bacteroidia; Bacteroidales; Prevotellaceae; Prevotella; Prevotella tannerae	0.964985	1.79211	0.992556
OTU083	Bacteria; Proteobacteria; Epsilonproteobacteria; Campylobacterales; Campylobacteraceae; Campylobacter; Campylobacter showae	0.055142	0.165426	0.082713	0.082713	0.027571	0.055142	0.027571	0	0.110284	0.220568	0.137855	0.358423		OTU083	Bacteria; Proteobacteria; Epsilonproteobacteria; Campylobacterales; Campylobacteraceae; Campylobacter; Campylobacter gracilis	0	0.135318	0.108254	0	0.0541272	0.0270636	0.243572	0.108254	0.189445	0.162382	0.135318	0.135318		OTU0083	Bacteria; Tenericutes; Mollicutes; Mycoplasmatales; Mycoplasmataceae; Mycoplasma; unclassified	0.0285796	0.114318	0.0571592	0	0.0857388	0.0285796	0.0857388	0.142898	0.114318	0.200057	0.0285796	0.200057		OTU083	Bacteria; Proteobacteria; Betaproteobacteria; Neisseriales; Neisseriaceae; Eikenella; Eikenella corrodens	0.055142	0.055142	0.055142
OTU084	Bacteria; Firmicutes; Clostridia; Clostridiales; Veillonellaceae; Selenomonas; unclassified	0.055142	0.055142	0	0.082713	0.110284	0.027571	0.165426	0.165426	0.303281	0.110284	0.192997	0.055142		OTU084	Bacteria; Spirochaetes; Spirochaetes; Spirochaetales; Spirochaetaceae; Treponema; unclassified	0.0270636	0.0811908	0.0270636	0	0.0270636	0.0270636	0.0811908	0.189445	0.216509	0.216509	0.189445	0.189445		OTU0084	Bacteria; Proteobacteria; Betaproteobacteria; Neisseriales; Neisseriaceae; Neisseria; unclassified	0.0285796	0.114318	0.0571592	0.171478	0.200057	0.0857388	0.200057	0.0571592	0.0285796	0.0571592	0.0285796	0.0571592		OTU084	Bacteria; Proteobacteria; Gammaproteobacteria; Pasteurellales; Pasteurellaceae; Haemophilus; Haemophilus parainfluenzae	3.58423	4.60436	2.83981
OTU085	Bacteria; Fusobacteria; Fusobacteria; Fusobacteriales; Fusobacteriaceae; Leptotrichia; unclassified	0.055142	0.137855	0.165426	0.192997	0.165426	0.441136	0.055142	0.027571	0	0	0.055142	0.027571		OTU085	Bacteria; Proteobacteria; Gammaproteobacteria; Pasteurellales; Pasteurellaceae; Haemophilus; Haemophilus parainfluenzae	0.108254	0.162382	0.0811908	0.243572	0.216509	0.0811908	0.0541272	0.0270636	0.0811908	0.0811908	0	0.135318		OTU0085	Bacteria; Proteobacteria; Gammaproteobacteria; Pasteurellales; Pasteurellaceae; unclassified; unclassified	0.0285796	0.171478	0.257216	0.142898	0.171478	0.114318	0	0.0285796	0.114318	0	0	0.0285796		OTU085	Bacteria; Proteobacteria; Betaproteobacteria; Neisseriales; Neisseriaceae; Simonsiella; unclassified	0	0	0
OTU086	Bacteria; Synergistetes; Synergistia; Synergistales; Dethiosulfovibrionaceae; TG5; unclassified	0.082713	0.027571	0.027571	0.055142	0	0.082713	0.110284	0.110284	0.27571	0.303281	0.082713	0.165426		OTU086	Bacteria; TM7; TM7-3; EW055; unclassified; unclassified; unclassified	0	0.108254	0.0270636	0.0270636	0.0811908	0.0270636	0.243572	0.135318	0.162382	0.162382	0.162382	0.135318		OTU0086	Bacteria; Fusobacteria; Fusobacteria; Fusobacteriales; Fusobacteriaceae; Leptotrichia; unclassified	0	0.114318	0.171478	0.114318	0.114318	0.285796	0.0571592	0.0571592	0	0.0285796	0.0285796	0.0571592		OTU086	Bacteria; Proteobacteria; Betaproteobacteria; Neisseriales; Neisseriaceae; unclassified; unclassified	0	0	0
OTU087	Bacteria; Proteobacteria; Gammaproteobacteria; Pasteurellales; Pasteurellaceae; Actinobacillus; Haemophilus parahaemolyticus	0.27571	0.248139	0.220568	0.082713	0.220568	0.110284	0.027571	0.082713	0	0	0.027571	0		OTU087	Bacteria; Proteobacteria; Epsilonproteobacteria; Campylobacterales; Campylobacteraceae; Campylobacter; unclassified	0	0.0811908	0.108254	0.0811908	0.0270636	0.135318	0.0270636	0.162382	0.108254	0.189445	0.189445	0.108254		OTU0087	Bacteria; Firmicutes; Clostridia; Clostridiales; ClostridialesFamilyXIII.IncertaeSedis; Mogibacterium; unclassified	0.0285796	0.0571592	0.0285796	0	0.0857388	0.0571592	0.0857388	0.0571592	0.171478	0.0285796	0.228637	0.200057		OTU087	Bacteria; Bacteroidetes; Bacteroidia; Bacteroidales; Porphyromonadaceae; Porphyromonas; Porphyromonas gingivalis	0	0	0
OTU088	Bacteria; TM7; TM7-3; unclassified; unclassified; unclassified; unclassified	0.027571	0.303281	0.110284	0.082713	0.137855	0.110284	0.027571	0.027571	0.027571	0.248139	0.055142	0.137855		OTU088	Bacteria; Firmicutes; Bacilli; Lactobacillales; Streptococcaceae; Streptococcus; unclassified	0.108254	0.135318	0.189445	0.108254	0.216509	0.189445	0.0541272	0.0270636	0.0270636	0.0541272	0.0270636	0.0811908		OTU0088	Bacteria; Bacteroidetes; Bacteroidia; Bacteroidales; Porphyromonadaceae; Porphyromonas; unclassified	0	0.200057	0.0571592	0.200057	0.0857388	0.114318	0	0.0571592	0.142898	0.114318	0	0.0285796		OTU088	Bacteria; Proteobacteria; Betaproteobacteria; Neisseriales; Neisseriaceae; Neisseria; unclassified	26.606	22.0568	26.1649
OTU089	Bacteria; Proteobacteria; Epsilonproteobacteria; Campylobacterales; Campylobacteraceae; Campylobacter; unclassified	0	0.027571	0.110284	0.137855	0.055142	0.137855	0	0.137855	0.110284	0.165426	0.192997	0.192997		OTU089	Bacteria; Bacteroidetes; Bacteroidia; Bacteroidales; Prevotellaceae; Prevotella; Prevotella histicola	0.0811908	0.216509	0.0811908	0.135318	0.135318	0.108254	0.135318	0.0270636	0.0270636	0.0811908	0.108254	0.0270636		OTU0089	Bacteria; Actinobacteria; Actinobacteria; Actinomycetales; Corynebacteriaceae; Corynebacterium; Corynebacterium durum	0	0.0285796	0.0285796	0	0.0285796	0.0571592	0.171478	0.142898	0.0857388	0.142898	0.171478	0.114318		OTU089	Bacteria; Proteobacteria; Gammaproteobacteria; Pasteurellales; Pasteurellaceae; Haemophilus; Haemophilus parainfluenzae	0	0.027571	0
OTU090	Bacteria; Spirochaetes; Spirochaetes; Spirochaetales; Spirochaetaceae; Treponema; unclassified	0.055142	0.027571	0.027571	0	0	0.027571	0.137855	0.192997	0.165426	0.220568	0.220568	0.165426		OTU090	Bacteria; Fusobacteria; Fusobacteria; Fusobacteriales; Fusobacteriaceae; Leptotrichia; unclassified	0.108254	0.189445	0.135318	0.135318	0.135318	0.189445	0.0811908	0	0.0541272	0.0270636	0.0541272	0.0270636		OTU0090	Bacteria; Proteobacteria; Gammaproteobacteria; Pasteurellales; Pasteurellaceae; Aggregatibacter; Aggregatibacter segnis	0.0285796	0	0.142898	0.0285796	0.114318	0.0571592	0.0857388	0.0857388	0.114318	0.0285796	0.171478	0.0857388		OTU090	Bacteria; Proteobacteria; Betaproteobacteria; unclassified; unclassified; unclassified; unclassified	0	0.055142	0
OTU091	Bacteria; Firmicutes; Bacilli; Lactobacillales; Streptococcaceae; Streptococcus; unclassified	0.137855	0.082713	0.192997	0.165426	0.248139	0.110284	0.055142	0.027571	0.110284	0	0	0.082713		OTU091	Bacteria; Proteobacteria; Gammaproteobacteria; Pasteurellales; Pasteurellaceae; Aggregatibacter; Aggregatibacter aphrophilus	0.0270636	0.0541272	0	0.0541272	0.0270636	0	0.189445	0.270636	0.108254	0.108254	0.189445	0.0811908		OTU0091	Bacteria; Bacteroidetes; Bacteroidia; Bacteroidales; Prevotellaceae; Prevotella; unclassified	0.0857388	0.114318	0	0.0857388	0	0	0	0.171478	0.171478	0	0.171478	0.142898		OTU091	Bacteria; Proteobacteria; Betaproteobacteria; Neisseriales; Neisseriaceae; Kingella; Kingella oralis	0.027571	0.027571	0.027571
OTU092	Bacteria; Bacteroidetes; Bacteroidia; Bacteroidales; Prevotellaceae; Prevotella; Prevotella histicola	0.110284	0.110284	0.082713	0.192997	0.082713	0.248139	0.110284	0.027571	0.027571	0.137855	0.027571	0.055142		OTU092	Bacteria; Bacteroidetes; Bacteroidia; Bacteroidales; Porphyromonadaceae; Porphyromonas; unclassified	0.0270636	0.0541272	0.108254	0.2977	0.108254	0.135318	0.0541272	0.0811908	0.0270636	0.0270636	0.0270636	0.0811908		OTU0092	Bacteria; Bacteroidetes; Bacteroidia; Bacteroidales; Prevotellaceae; Prevotella; Prevotella nanceiensis	0.0571592	0.200057	0.0571592	0.0571592	0.171478	0.0857388	0.0571592	0.142898	0.0285796	0.0285796	0.0285796	0		OTU092	Bacteria; Proteobacteria; Betaproteobacteria; Neisseriales; Neisseriaceae; Neisseria; unclassified	6.14833	4.35622	5.45906
OTU093	Bacteria; Tenericutes; Mollicutes; Mycoplasmatales; Mycoplasmataceae; Mycoplasma; unclassified	0.027571	0.027571	0.055142	0.082713	0.110284	0.055142	0.082713	0.110284	0.110284	0.165426	0.137855	0.192997		OTU093	Bacteria; Fusobacteria; Fusobacteria; Fusobacteriales; Fusobacteriaceae; Leptotrichia; unclassified	0.0541272	0.135318	0.162382	0.135318	0.0541272	0.270636	0.0270636	0.0541272	0	0	0.0541272	0.0811908		OTU0093	Bacteria; Proteobacteria; Gammaproteobacteria; Pasteurellales; Pasteurellaceae; Haemophilus; Haemophilus haemolyticus	0.0857388	0.114318	0.0857388	0.142898	0.142898	0.171478	0.0285796	0	0.0571592	0	0.0571592	0		OTU093	Bacteria; Actinobacteria; Actinobacteria; Actinomycetales; Corynebacteriaceae; Corynebacterium; Corynebacterium matruchotii	0.027571	0	0.027571
OTU094	Bacteria; Fusobacteria; Fusobacteria; Fusobacteriales; Fusobacteriaceae; Fusobacterium; unclassified	0	0.110284	0.055142	0.082713	0.055142	0	0.110284	0.110284	0.137855	0.192997	0.165426	0.137855		OTU094	Bacteria; Fusobacteria; Fusobacteria; Fusobacteriales; Fusobacteriaceae; Fusobacterium; unclassified	0	0.0811908	0.0541272	0.0811908	0	0	0.162382	0.108254	0.0811908	0.108254	0.162382	0.135318		OTU0094	Bacteria; SR1; unclassified; unclassified; unclassified; unclassified; unclassified	0.0571592	0	0	0.0571592	0.0571592	0	0.0571592	0.114318	0.114318	0.114318	0.114318	0.200057		OTU094	Bacteria; Proteobacteria; Betaproteobacteria; Neisseriales; Neisseriaceae; Neisseria; Neisseria subflava	0	0	0
OTU095	Bacteria; Firmicutes; Clostridia; Clostridiales; unclassified; unclassified; unclassified	0	0.110284	0.055142	0.027571	0.027571	0.055142	0.110284	0.137855	0.137855	0.110284	0.165426	0.165426		OTU095	Bacteria; Proteobacteria; Gammaproteobacteria; Pasteurellales; Pasteurellaceae; Aggregatibacter; Aggregatibacter segnis	0.0270636	0.135318	0.135318	0.0270636	0.0811908	0.0541272	0.108254	0.0811908	0.0541272	0.0541272	0.162382	0.0541272		OTU0095	Bacteria; Firmicutes; Bacilli; Lactobacillales; Streptococcaceae; Streptococcus; unclassified	0.114318	0.142898	0.142898	0.0571592	0.200057	0.142898	0.0285796	0	0	0.0285796	0	0		OTU095	Bacteria; Proteobacteria; Betaproteobacteria; Neisseriales; Neisseriaceae; Neisseria; unclassified	0.192997	0.137855	0.330852
OTU096	Bacteria; Proteobacteria; Gammaproteobacteria; Pasteurellales; Pasteurellaceae; Aggregatibacter; Aggregatibacter aphrophilus	0.027571	0	0	0.027571	0.027571	0.027571	0.248139	0.248139	0.137855	0.110284	0.110284	0.110284		OTU096	Bacteria; Proteobacteria; Epsilonproteobacteria; Campylobacterales; Campylobacteraceae; Campylobacter; Campylobacter showae	0.0541272	0.0811908	0.0811908	0.0811908	0.0270636	0.108254	0.0270636	0.0270636	0.0541272	0.0541272	0.189445	0.189445		OTU0096	Bacteria; Fusobacteria; Fusobacteria; Fusobacteriales; Fusobacteriaceae; Leptotrichia; unclassified	0.171478	0.0571592	0.0285796	0.0857388	0.171478	0.200057	0	0.0285796	0.0571592	0	0.0285796	0.0285796		OTU096	Bacteria; Proteobacteria; Betaproteobacteria; Burkholderiales; Burkholderiaceae; unclassified; unclassified	0	0	0
OTU097	Bacteria; Bacteroidetes; Bacteroidia; Bacteroidales; Porphyromonadaceae; Porphyromonas; unclassified	0	0.110284	0.055142	0.27571	0.137855	0.220568	0.055142	0.027571	0.110284	0.055142	0.027571	0		OTU097	Bacteria; Proteobacteria; Gammaproteobacteria; Pasteurellales; Pasteurellaceae; unclassified; unclassified	0.0541272	0.162382	0.243572	0.108254	0.0811908	0.0811908	0.0270636	0.0270636	0.162382	0	0	0		OTU0097	Bacteria; Proteobacteria; Betaproteobacteria; Burkholderiales; Comamonadaceae; Pelomonas; unclassified	0.0571592	0.0285796	0.0571592	0	0.114318	0.0857388	0.0857388	0.0857388	0.0285796	0.0285796	0.114318	0.142898		OTU097	Bacteria; Proteobacteria; Betaproteobacteria; Burkholderiales; Burkholderiaceae; Lautropia; unclassified	15.6052	12.4897	15.2743
OTU098	Bacteria; Proteobacteria; Betaproteobacteria; Neisseriales; Neisseriaceae; Neisseria; unclassified	0	0.165426	0.082713	0.137855	0.248139	0.055142	0.165426	0.055142	0.027571	0.110284	0.027571	0		OTU098	Bacteria; Proteobacteria; Gammaproteobacteria; Pasteurellales; Pasteurellaceae; Haemophilus; Haemophilus haemolyticus	0.0811908	0.0811908	0.0811908	0.162382	0.162382	0.162382	0.108254	0	0.0541272	0	0.0541272	0		OTU0098	Bacteria; Actinobacteria; Actinobacteria; Actinomycetales; Micrococcaceae; Rothia; Rothia mucilaginosa	0.0285796	0.0857388	0.0571592	0.0285796	0.0857388	0.0571592	0.0857388	0.142898	0.0571592	0.0857388	0.0571592	0.0571592		OTU098	Bacteria; Proteobacteria; Betaproteobacteria; Neisseriales; Neisseriaceae; Neisseria; unclassified	1.32341	1.48883	1.24069
OTU099	Bacteria; Fusobacteria; Fusobacteria; Fusobacteriales; Fusobacteriaceae; Leptotrichia; unclassified	0.137855	0.082713	0.137855	0.192997	0.110284	0.165426	0.082713	0	0.027571	0.055142	0.027571	0.027571		OTU099	Bacteria; Bacteroidetes; Bacteroidia; Bacteroidales; Porphyromonadaceae; Porphyromonas; unclassified	0.135318	0.0270636	0.0541272	0.108254	0.135318	0.0811908	0.0541272	0.0811908	0.0270636	0.0270636	0.0811908	0.108254		OTU0099	Bacteria; Firmicutes; Clostridia; Clostridiales; Peptostreptococcaceae; Filifactor; unclassified	0.114318	0.0571592	0.0857388	0.142898	0.0571592	0.0857388	0.0571592	0.0285796	0.0285796	0.0285796	0.0285796	0.0857388		OTU099	Bacteria; Proteobacteria; Gammaproteobacteria; Pasteurellales; Pasteurellaceae; Actinobacillus; Haemophilus parahaemolyticus	0.27571	0.27571	0.220568
OTU100	Bacteria; Bacteroidetes; Bacteroidia; Bacteroidales; Porphyromonadaceae; Porphyromonas; unclassified	0	0.055142	0.110284	0.220568	0.055142	0.192997	0.082713	0.027571	0.055142	0.082713	0.082713	0.082713		OTU100	Bacteria; Firmicutes; Bacilli; Lactobacillales; Streptococcaceae; Streptococcus; unclassified	0.108254	0.189445	0.135318	0.0270636	0.243572	0.0811908	0.0270636	0	0	0.0541272	0.0270636	0.0270636		OTU0100	Bacteria; unclassified; unclassified; unclassified; unclassified; unclassified; unclassified	0.0285796	0.0285796	0.0571592	0.0285796	0	0.0285796	0.171478	0.114318	0.142898	0.0571592	0.0571592	0.0857388		OTU100	Bacteria; Bacteroidetes; Bacteroidia; Bacteroidales; Prevotellaceae; Prevotella; Prevotella intermedia	0.248139	0.330852	0.192997
OTU101	Bacteria; Firmicutes; Bacilli; Lactobacillales; Streptococcaceae; Streptococcus; unclassified	0.110284	0.082713	0.137855	0.165426	0.303281	0.137855	0.027571	0	0.027571	0.027571	0.027571	0		OTU101	Bacteria; Bacteroidetes; Bacteroidia; Bacteroidales; Porphyromonadaceae; Porphyromonas; unclassified	0	0.135318	0.0541272	0.189445	0.135318	0.135318	0.0270636	0.0541272	0.0811908	0.0811908	0	0		OTU0101	Bacteria; Spirochaetes; Spirochaetes; Spirochaetales; Spirochaetaceae; Treponema; Treponema socranskii	0	0.0285796	0	0	0	0	0	0.0571592	0.285796	0.257216	0.0571592	0.0857388		OTU101	Bacteria; Proteobacteria; Gammaproteobacteria; Pasteurellales; Pasteurellaceae; Haemophilus; Haemophilus haemolyticus	0.082713	0.192997	0.082713
OTU102	Bacteria; Actinobacteria; Actinobacteria; Actinomycetales; Corynebacteriaceae; Corynebacterium; Corynebacterium durum	0	0.055142	0.027571	0	0.055142	0.027571	0.165426	0.165426	0.165426	0	0.165426	0.192997		OTU102	Bacteria; Tenericutes; Mollicutes; Mycoplasmatales; Mycoplasmataceae; Mycoplasma; unclassified	0	0.0541272	0.0541272	0.0541272	0.108254	0.0270636	0.0270636	0.135318	0.0541272	0.162382	0.0541272	0.162382		OTU0102	Bacteria; Firmicutes; Clostridia; Clostridiales; Lachnospiraceae; unclassified; unclassified	0.0857388	0.0571592	0.0857388	0.142898	0	0.0571592	0.142898	0	0.0285796	0.0571592	0.0571592	0.0571592		OTU102	Bacteria; Proteobacteria; Gammaproteobacteria; Pasteurellales; Pasteurellaceae; unclassified; unclassified	0.055142	0.165426	0.248139
OTU103	Bacteria; Proteobacteria; Gammaproteobacteria; Pasteurellales; Pasteurellaceae; unclassified; unclassified	0.055142	0.165426	0.248139	0.110284	0.137855	0.082713	0.027571	0.027571	0.082713	0	0	0		OTU103	Bacteria; Actinobacteria; Actinobacteria; Actinomycetales; Micrococcaceae; Rothia; Rothia mucilaginosa	0.0270636	0.0811908	0.0541272	0.0541272	0.0270636	0.0270636	0.135318	0.108254	0.135318	0.135318	0.0270636	0.0811908		OTU0103	Bacteria; Bacteroidetes; unclassified; unclassified; unclassified; unclassified; unclassified	0	0.142898	0.0285796	0	0.0857388	0.0285796	0.0285796	0.114318	0.114318	0.0285796	0.142898	0.0571592		OTU103	Bacteria; Proteobacteria; Betaproteobacteria; Burkholderiales; Comamonadaceae; Pelomonas; unclassified	0.055142	0.055142	0.055142
OTU104	Bacteria; Proteobacteria; Gammaproteobacteria; Pasteurellales; Pasteurellaceae; Haemophilus; Haemophilus haemolyticus	0.082713	0.192997	0.082713	0.137855	0.110284	0.082713	0.110284	0	0.055142	0	0.055142	0.027571		OTU104	Bacteria; unclassified; unclassified; unclassified; unclassified; unclassified; unclassified	0.0270636	0.0270636	0.0541272	0.108254	0	0.0270636	0.216509	0.108254	0.135318	0.0541272	0.0270636	0.0541272		OTU0104	Bacteria; TM7; TM7-3; EW055; unclassified; unclassified; unclassified	0.0285796	0.0571592	0	0.0571592	0.0285796	0	0.0285796	0.142898	0.114318	0.171478	0.0857388	0.0571592		OTU104	Bacteria; Bacteroidetes; Bacteroidia; Bacteroidales; Prevotellaceae; Prevotella; Prevotella oris	0.689275	0.854701	0.330852
OTU105	Bacteria; Actinobacteria; Actinobacteria; Actinomycetales; Micrococcaceae; Rothia; Rothia mucilaginosa	0.027571	0.110284	0.055142	0.110284	0.027571	0.027571	0.027571	0.137855	0.137855	0.137855	0.082713	0.055142		OTU105	Bacteria; Bacteroidetes; unclassified; unclassified; unclassified; unclassified; unclassified	0	0.0541272	0.0270636	0.0270636	0.0811908	0.0811908	0	0.0811908	0.135318	0.135318	0.135318	0.0541272		OTU0105	Bacteria; Fusobacteria; Fusobacteria; Fusobacteriales; Fusobacteriaceae; Fusobacterium; unclassified	0	0.0571592	0.0285796	0.0571592	0.0571592	0.114318	0.0571592	0.0285796	0.0571592	0.0285796	0.171478	0.0857388		OTU105	Bacteria; Proteobacteria; Betaproteobacteria; Neisseriales; Neisseriaceae; Neisseria; unclassified	0	0.330852	0.055142
OTU106	Bacteria; Bacteroidetes; Bacteroidia; Bacteroidales; Prevotellaceae; Prevotella; Prevotella nanceiensis	0.055142	0.165426	0.055142	0.110284	0.055142	0.082713	0.027571	0.137855	0.082713	0.055142	0.055142	0.055142		OTU106	Bacteria; TM7; TM7-3; EW055; unclassified; unclassified; unclassified	0	0.0811908	0	0.0541272	0.0541272	0.0270636	0.0541272	0.108254	0.0811908	0.162382	0.135318	0.0541272		OTU0106	Bacteria; Bacteroidetes; Bacteroidia; Bacteroidales; Prevotellaceae; Prevotella; unclassified	0	0.0285796	0	0	0.0857388	0	0.142898	0.200057	0.114318	0.0857388	0.0285796	0.0285796		OTU106	Bacteria; Proteobacteria; Betaproteobacteria; Neisseriales; Neisseriaceae; Neisseria; unclassified	0.055142	0.055142	0
OTU107	Bacteria; Firmicutes; Clostridia; Clostridiales; ClostridialesFamilyXIII.IncertaeSedis; Mogibacterium; unclassified	0.055142	0.082713	0.027571	0.027571	0.027571	0.055142	0.082713	0.055142	0.110284	0.027571	0.137855	0.192997		OTU107	Bacteria; Firmicutes; Clostridia; Clostridiales; Peptostreptococcaceae; Filifactor; unclassified	0.108254	0.108254	0.0811908	0.0270636	0	0.135318	0.0270636	0.0270636	0.0270636	0.108254	0.0541272	0.108254		OTU0107	Bacteria; Bacteroidetes; unclassified; unclassified; unclassified; unclassified; unclassified	0	0	0	0	0	0	0	0	0.142898	0.571592	0	0		OTU107	Bacteria; Proteobacteria; Gammaproteobacteria; Pasteurellales; Pasteurellaceae; Haemophilus; unclassified	0.027571	0	0.027571
OTU108	Bacteria; Spirochaetes; Spirochaetes; Spirochaetales; Spirochaetaceae; Treponema; Treponema denticola	0	0.027571	0.027571	0.055142	0.027571	0	0.055142	0.110284	0.220568	0.220568	0	0.082713		OTU108	Bacteria; Proteobacteria; Betaproteobacteria; Burkholderiales; Comamonadaceae; Pelomonas; unclassified	0.0270636	0.0270636	0.0541272	0	0.0811908	0.0270636	0.189445	0.0811908	0.0270636	0	0.108254	0.189445		OTU0108	Bacteria; Firmicutes; Clostridia; Clostridiales; Peptococcaceae; Peptococcus; unclassified	0.0857388	0.228637	0.0571592	0.142898	0.0285796	0.114318	0	0	0.0285796	0	0.0285796	0		OTU108	Bacteria; Proteobacteria; Betaproteobacteria; Neisseriales; Neisseriaceae; Neisseria; unclassified	0.027571	0.689275	0.082713
OTU109	Bacteria; SR1; unclassified; unclassified; unclassified; unclassified; unclassified	0.055142	0	0	0	0.055142	0	0.027571	0.137855	0.110284	0.110284	0.137855	0.165426		OTU109	Bacteria; Spirochaetes; Spirochaetes; Spirochaetales; Spirochaetaceae; Treponema; Treponema denticola	0	0	0.0270636	0.0541272	0	0	0.0811908	0.108254	0.243572	0.135318	0.108254	0.0270636		OTU0109	Bacteria; TM7; TM7-3; EW055; unclassified; unclassified; unclassified	0.0285796	0	0	0.0285796	0	0	0.0571592	0.171478	0.0571592	0.142898	0.171478	0.0571592		OTU109	Bacteria; Proteobacteria; Gammaproteobacteria; Pasteurellales; Pasteurellaceae; Haemophilus; Haemophilus parainfluenzae	0	0	0
OTU110	Bacteria; Fusobacteria; Fusobacteria; Fusobacteriales; Fusobacteriaceae; Leptotrichia; unclassified	0.137855	0.165426	0.027571	0.082713	0.137855	0.137855	0.027571	0.027571	0.027571	0	0	0.027571		OTU110	Bacteria; Bacteroidetes; Bacteroidia; Bacteroidales; Prevotellaceae; Prevotella; unclassified	0	0.0811908	0	0	0	0	0.135318	0.189445	0.0811908	0.0811908	0.0541272	0.162382		OTU0110	Bacteria; Synergistetes; Synergistia; Synergistales; Dethiosulfovibrionaceae; TG5; unclassified	0.0285796	0.0285796	0.0571592	0.0285796	0.0285796	0.0571592	0.0285796	0.0571592	0.0285796	0.114318	0.0857388	0.114318		OTU110	Bacteria; Proteobacteria; Betaproteobacteria; Neisseriales; Neisseriaceae; Neisseria; Neisseria subflava	0	0.055142	0
OTU111	Bacteria; TM7; TM7-3; EW055; unclassified; unclassified; unclassified	0.027571	0	0	0.027571	0	0	0.192997	0.165426	0.055142	0.165426	0.110284	0.055142		OTU111	Bacteria; Firmicutes; Clostridia; Clostridiales; Eubacteriaceae; Eubacterium; Eubacterium yuri	0.0541272	0.0541272	0.0541272	0	0.0541272	0	0.108254	0.0811908	0.108254	0.0811908	0.0270636	0.135318		OTU0111	Bacteria; Bacteroidetes; Bacteroidia; Bacteroidales; Prevotellaceae; Prevotella; unclassified	0	0.0285796	0.0285796	0	0.0571592	0.0571592	0.0857388	0.0285796	0.114318	0.0285796	0.0285796	0.200057		OTU111	Bacteria; Proteobacteria; Gammaproteobacteria; Pasteurellales; Pasteurellaceae; Aggregatibacter; unclassified	0.082713	0.192997	0
OTU112	Bacteria; Bacteroidetes; unclassified; unclassified; unclassified; unclassified; unclassified	0	0.110284	0.027571	0	0.110284	0.055142	0.027571	0.110284	0.110284	0.082713	0.055142	0.082713		OTU112	Bacteria; Actinobacteria; Actinobacteria; Actinomycetales; Corynebacteriaceae; Corynebacterium; Corynebacterium durum	0	0	0.0270636	0	0	0	0.0811908	0.189445	0.0811908	0.108254	0.216509	0.0541272		OTU0112	Bacteria; Firmicutes; Bacilli; Lactobacillales; Streptococcaceae; Streptococcus; unclassified	0.257216	0.0285796	0.0571592	0.0571592	0	0.114318	0	0	0	0.0571592	0	0.0571592		OTU112	Bacteria; Proteobacteria; Betaproteobacteria; Neisseriales; Neisseriaceae; Neisseria; Neisseria cinerea	0	0	0
OTU113	Bacteria; Firmicutes; Clostridia; Clostridiales; Peptostreptococcaceae; Filifactor; unclassified	0.055142	0.055142	0.082713	0.055142	0.055142	0.110284	0.055142	0.027571	0.055142	0.027571	0.055142	0.110284		OTU113	Bacteria; Bacteroidetes; Bacteroidia; Bacteroidales; Prevotellaceae; Prevotella; Prevotella nanceiensis	0.0541272	0.0541272	0.0541272	0.108254	0.0811908	0.108254	0.0541272	0.135318	0	0	0.0270636	0.0541272		OTU0113	Bacteria; Fusobacteria; Fusobacteria; Fusobacteriales; Fusobacteriaceae; Leptotrichia; unclassified	0.0857388	0.0285796	0.0571592	0.0571592	0.0285796	0.0857388	0	0.0285796	0	0	0.142898	0.0857388		OTU113	Bacteria; Proteobacteria; Gammaproteobacteria; Pasteurellales; Pasteurellaceae; Aggregatibacter; Aggregatibacter segnis	0	0.027571	0.082713
OTU114	Bacteria; Firmicutes; Bacilli; Lactobacillales; Streptococcaceae; Streptococcus; unclassified	0.248139	0.027571	0.055142	0.027571	0.082713	0.027571	0.027571	0	0.027571	0.082713	0.027571	0.082713		OTU114	Bacteria; TM7; TM7-3; EW055; unclassified; unclassified; unclassified	0.0270636	0	0	0	0	0.0270636	0.108254	0.135318	0.0811908	0.189445	0.108254	0.0541272		OTU0114	Bacteria; Spirochaetes; Spirochaetes; Spirochaetales; Spirochaetaceae; Treponema; Treponema denticola	0	0.0571592	0.0285796	0.0571592	0.0285796	0	0.0285796	0.0857388	0.171478	0.0571592	0.0285796	0.0571592		OTU114	Bacteria; Proteobacteria; Betaproteobacteria; Neisseriales; Neisseriaceae; Neisseria; unclassified	0	0	0
OTU115	Bacteria; TM7; TM7-3; EW055; unclassified; unclassified; unclassified	0	0.027571	0.082713	0.082713	0.082713	0.110284	0.027571	0.055142	0.082713	0	0.110284	0.055142		OTU115	Bacteria; Fusobacteria; Fusobacteria; Fusobacteriales; Fusobacteriaceae; Leptotrichia; unclassified	0.162382	0.135318	0.0270636	0.108254	0.0811908	0.108254	0	0.0270636	0.0270636	0	0.0270636	0.0270636		OTU0115	Bacteria; Fusobacteria; Fusobacteria; Fusobacteriales; Fusobacteriaceae; Leptotrichia; unclassified	0	0.171478	0.0285796	0.142898	0.0285796	0.0285796	0.0285796	0	0.114318	0	0	0.0285796		OTU115	Bacteria; Tenericutes; Erysipelotrichi; Erysipelotrichales; Erysipelotrichaceae; Bulleidia; Solobacterium moorei	0.027571	0.027571	0.027571
OTU116	Bacteria; Firmicutes; Clostridia; Clostridiales; Eubacteriaceae; Eubacterium; Eubacterium yuri	0.055142	0.027571	0.055142	0	0.055142	0	0.110284	0.082713	0.082713	0.055142	0.027571	0.165426		OTU116	Bacteria; TM7; TM7-3; EW055; unclassified; unclassified; unclassified	0	0.0811908	0.0811908	0.0541272	0.0270636	0.0811908	0.0541272	0.0811908	0.108254	0.0541272	0.0811908	0		OTU0116	Bacteria; Proteobacteria; Gammaproteobacteria; Vibrionales; Vibrionaceae; Photobacterium; unclassified	0.0285796	0	0.0285796	0	0	0	0	0.0285796	0	0.0571592	0.200057	0.200057		OTU116	Bacteria; Tenericutes; Erysipelotrichi; Erysipelotrichales; Erysipelotrichaceae; Bulleidia; Bulleidia extructa	0	0	0
OTU117	Bacteria; TM7; TM7-3; EW055; unclassified; unclassified; unclassified	0.027571	0.110284	0	0.027571	0.055142	0	0.082713	0.110284	0.055142	0.055142	0.110284	0.055142		OTU117	Bacteria; Bacteroidetes; Flavobacteria; Flavobacteriales; Flavobacteriaceae; Capnocytophaga; Capnocytophaga ochracea	0	0	0.0541272	0.108254	0	0	0.0541272	0.135318	0	0.135318	0.0541272	0.162382		OTU0117	Bacteria; Proteobacteria; Betaproteobacteria; Burkholderiales; Burkholderiaceae; Lautropia; unclassified	0.0285796	0.0285796	0	0.0285796	0.0285796	0.114318	0.0285796	0.0571592	0.0285796	0	0.114318	0.0857388		OTU117	Bacteria; Proteobacteria; Gammaproteobacteria; Vibrionales; Vibrionaceae; Photobacterium; unclassified	0.027571	0.027571	0.027571
OTU118	Bacteria; Fusobacteria; Fusobacteria; Fusobacteriales; Fusobacteriaceae; Leptotrichia; unclassified	0	0.165426	0.027571	0.248139	0.082713	0.027571	0.027571	0	0.082713	0	0	0.027571		OTU118	Bacteria; Proteobacteria; Gammaproteobacteria; Vibrionales; Vibrionaceae; Photobacterium; unclassified	0.0270636	0.0270636	0.0270636	0	0	0.0270636	0	0.0270636	0	0.0270636	0.189445	0.351827		OTU0118	Bacteria; unclassified; unclassified; unclassified; unclassified; unclassified; unclassified	0	0	0	0	0.0571592	0.0285796	0	0.142898	0.0857388	0.0857388	0.0285796	0.0857388		OTU118	Bacteria; Proteobacteria; Gammaproteobacteria; Pseudomonadales; Moraxellaceae; Acinetobacter; unclassified	0	0	0
OTU119	Bacteria; Proteobacteria; Betaproteobacteria; Burkholderiales; Comamonadaceae; Pelomonas; unclassified	0.055142	0.055142	0.055142	0.055142	0.027571	0.055142	0.027571	0.055142	0.055142	0	0.110284	0.137855		OTU119	Bacteria; SR1; unclassified; unclassified; unclassified; unclassified; unclassified	0.0270636	0	0	0	0.0270636	0	0.0541272	0.162382	0.0270636	0.0811908	0.162382	0.135318		OTU0119	Bacteria; Proteobacteria; Gammaproteobacteria; Pasteurellales; Pasteurellaceae; Haemophilus; Haemophilus parainfluenzae	0.0285796	0.142898	0	0.0857388	0.0285796	0.0857388	0	0.0285796	0.0285796	0	0.0571592	0.0285796		OTU119	Bacteria; Proteobacteria; Gammaproteobacteria; Pseudomonadales; Moraxellaceae; Acinetobacter; Acinetobacter schindleri	0	0	0
OTU120	Bacteria; Firmicutes; Clostridia; Clostridiales; Lachnospiraceae; unclassified; unclassified	0.055142	0.027571	0.082713	0.082713	0.055142	0.055142	0.137855	0.027571	0	0.027571	0	0.110284		OTU120	Bacteria; Firmicutes; Clostridia; Clostridiales; ClostridialesFamilyXIII.IncertaeSedis; Mogibacterium; unclassified	0.0541272	0.135318	0.0270636	0	0.0270636	0.0270636	0.0811908	0.0541272	0.0811908	0.0270636	0.0541272	0.0811908		OTU0120	Bacteria; Proteobacteria; Gammaproteobacteria; Pasteurellales; Pasteurellaceae; Haemophilus; Haemophilus parainfluenzae	0	0.0571592	0	0.0285796	0.114318	0.0285796	0.0857388	0	0.0857388	0	0	0.114318		OTU120	Bacteria; Proteobacteria; Betaproteobacteria; Neisseriales; Neisseriaceae; Neisseria; Neisseria subflava	0	0	0
OTU121	Bacteria; Fusobacteria; Fusobacteria; Fusobacteriales; Fusobacteriaceae; Leptotrichia; unclassified	0.110284	0.027571	0.055142	0.110284	0.082713	0.027571	0.027571	0.027571	0	0.027571	0.055142	0.110284		OTU121	Bacteria; Fusobacteria; Fusobacteria; Fusobacteriales; Fusobacteriaceae; Leptotrichia; unclassified	0	0.0811908	0.0541272	0.108254	0.135318	0.135318	0.0270636	0.0270636	0.0270636	0	0	0.0541272		OTU0121	Bacteria; Fusobacteria; Fusobacteria; Fusobacteriales; Fusobacteriaceae; Leptotrichia; unclassified	0	0.142898	0.0571592	0.0285796	0.142898	0.0285796	0	0.0285796	0	0	0	0.0857388		OTU121	Bacteria; Proteobacteria; Gammaproteobacteria; Pseudomonadales; Pseudomonadaceae; Pseudomonas; Pseudomonas fragi	0	0	0
OTU122	Bacteria; unclassified; unclassified; unclassified; unclassified; unclassified; unclassified	0	0.055142	0.055142	0.027571	0	0.027571	0.220568	0.055142	0.110284	0.027571	0.027571	0.055142		OTU122	Bacteria; Fusobacteria; Fusobacteria; Fusobacteriales; Fusobacteriaceae; Leptotrichia; unclassified	0.135318	0	0.0541272	0.0811908	0.0270636	0.135318	0.0270636	0.0270636	0	0	0.0811908	0.0541272		OTU0122	Bacteria; Fusobacteria; Fusobacteria; Fusobacteriales; Fusobacteriaceae; Leptotrichia; unclassified	0	0.0857388	0.0571592	0.0571592	0	0.0571592	0.0571592	0.0285796	0.0285796	0.0285796	0.0571592	0.0285796		OTU122	Bacteria; Proteobacteria; Betaproteobacteria; Neisseriales; Neisseriaceae; Neisseria; Neisseria subflava	0.027571	0	0
OTU123	Bacteria; Firmicutes; Clostridia; Clostridiales; Peptococcaceae; Peptococcus; unclassified	0.137855	0.082713	0.055142	0.192997	0.027571	0.027571	0.027571	0	0.055142	0	0.027571	0.027571		OTU123	Bacteria; Proteobacteria; Betaproteobacteria; unclassified; unclassified; unclassified; unclassified	0	0.162382	0	0.108254	0	0.0541272	0.0541272	0.0811908	0.0270636	0.0811908	0.0541272	0		OTU0123	Bacteria; Bacteroidetes; Bacteroidia; Bacteroidales; Prevotellaceae; Prevotella; unclassified	0.0571592	0	0.0285796	0.0571592	0.0571592	0	0.0857388	0	0.114318	0.0285796	0.0285796	0.0285796		OTU123	Bacteria; Proteobacteria; Betaproteobacteria; Neisseriales; Neisseriaceae; unclassified; unclassified	0.027571	0	0
OTU124	Bacteria; Bacteroidetes; Bacteroidia; Bacteroidales; Prevotellaceae; Prevotella; unclassified	0	0.082713	0	0	0.027571	0	0.110284	0.165426	0.055142	0.055142	0.055142	0.110284		OTU124	Bacteria; Bacteroidetes; Bacteroidia; Bacteroidales; Prevotellaceae; Prevotella; unclassified	0	0.0270636	0.0270636	0	0.0811908	0.0811908	0.0270636	0	0.0541272	0.0811908	0.0541272	0.162382		OTU0124	Bacteria; Actinobacteria; Actinobacteria; Actinomycetales; Propionibacteriaceae; unclassified; unclassified	0.0571592	0	0	0.0285796	0	0	0.0571592	0.0285796	0.0285796	0.0285796	0.142898	0.114318		OTU124	Bacteria; Proteobacteria; Betaproteobacteria; unclassified; unclassified; unclassified; unclassified	0	0.27571	0.055142
OTU125	Bacteria; Bacteroidetes; Bacteroidia; Bacteroidales; Prevotellaceae; Prevotella; unclassified	0	0.082713	0.027571	0	0.082713	0.055142	0.055142	0.027571	0.055142	0.055142	0.027571	0.165426		OTU125	Bacteria; Tenericutes; Mollicutes; RF39; unclassified; unclassified; unclassified	0	0.0541272	0.0270636	0.0270636	0.0270636	0.0811908	0	0.108254	0.0541272	0.108254	0.0811908	0.0270636		OTU0125	Bacteria; Firmicutes; Clostridia; Clostridiales; unclassified; unclassified; unclassified	0	0.0285796	0.0285796	0	0.0571592	0	0.0285796	0.142898	0.0285796	0	0.0857388	0.0571592		OTU125	Bacteria; Proteobacteria; Gammaproteobacteria; Pasteurellales; Pasteurellaceae; unclassified; unclassified	0	0.027571	0
OTU126	Bacteria; Tenericutes; Mollicutes; RF39; unclassified; unclassified; unclassified	0	0.027571	0.027571	0.027571	0.055142	0.110284	0.027571	0.110284	0.055142	0.082713	0.055142	0.055142		OTU126	Bacteria; Bacteroidetes; unclassified; unclassified; unclassified; unclassified; unclassified	0	0	0	0	0	0	0	0	0.162382	0.405954	0	0		OTU0126	Bacteria; Firmicutes; Clostridia; Clostridiales; unclassified; unclassified; unclassified	0	0.0285796	0.0285796	0.0285796	0	0.0285796	0.0571592	0	0.114318	0.0857388	0.0285796	0.0571592		OTU126	Bacteria; Proteobacteria; Betaproteobacteria; Neisseriales; Neisseriaceae; Neisseria; unclassified	0	0.027571	0
OTU127	Bacteria; Proteobacteria; Gammaproteobacteria; Vibrionales; Vibrionaceae; Photobacterium; unclassified	0.027571	0.027571	0.027571	0	0	0.027571	0.027571	0	0	0.055142	0.165426	0.27571		OTU127	Bacteria; Fusobacteria; Fusobacteria; Fusobacteriales; Fusobacteriaceae; Fusobacterium; unclassified	0	0.0541272	0.0811908	0.0541272	0.0270636	0.0811908	0.0541272	0.0270636	0.0541272	0	0.0541272	0.0811908		OTU0127	Bacteria; Firmicutes; Clostridia; Clostridiales; Lachnospiraceae; unclassified; unclassified	0	0	0.0571592	0.0857388	0	0.0571592	0	0.0285796	0.0285796	0.0571592	0.114318	0.0285796		OTU127	Bacteria; Proteobacteria; Betaproteobacteria; Neisseriales; Neisseriaceae; Neisseria; unclassified	0	0.027571	0
OTU128	Bacteria; Synergistetes; Synergistia; Synergistales; Dethiosulfovibrionaceae; TG5; unclassified	0.027571	0	0.055142	0.027571	0.027571	0.055142	0	0.055142	0.055142	0.082713	0.082713	0.137855		OTU128	Bacteria; Firmicutes; Clostridia; Clostridiales; Veillonellaceae; Dialister; Dialister invisus	0.0270636	0.108254	0.0270636	0.0541272	0.0811908	0.0541272	0.108254	0.0270636	0	0.0541272	0	0.0270636		OTU0128	Bacteria; Firmicutes; Clostridia; Clostridiales; Veillonellaceae; Selenomonas; Selenomonas noxia	0	0	0	0.0571592	0.0857388	0	0	0.0285796	0.0285796	0.0285796	0.0857388	0.142898		OTU128	Bacteria; Proteobacteria; Gammaproteobacteria; Pasteurellales; Pasteurellaceae; Haemophilus; unclassified	0	0.027571	0
OTU129	Bacteria; Firmicutes; Clostridia; Clostridiales; Veillonellaceae; Selenomonas; Selenomonas noxia	0	0	0	0	0.082713	0.027571	0	0.027571	0	0.165426	0.165426	0.137855		OTU129	Bacteria; Firmicutes; Clostridia; Clostridiales; unclassified; unclassified; unclassified	0	0.0541272	0.0270636	0	0.0541272	0.0270636	0	0.135318	0.0541272	0.0270636	0.0541272	0.135318		OTU0129	Bacteria; Fusobacteria; Fusobacteria; Fusobacteriales; Fusobacteriaceae; Fusobacterium; Fusobacterium necrophorum	0.0571592	0.0285796	0.0571592	0.0571592	0.0285796	0.0857388	0.0285796	0.0285796	0.0571592	0	0	0		OTU129	Bacteria; Bacteroidetes; Bacteroidia; Bacteroidales; Prevotellaceae; Prevotella; Prevotella baroniae	0	0.027571	0
OTU130	Bacteria; Bacteroidetes; unclassified; unclassified; unclassified; unclassified; unclassified	0	0	0	0	0	0	0	0	0.248139	0.330852	0	0.027571		OTU130	Bacteria; Synergistetes; Synergistia; Synergistales; Dethiosulfovibrionaceae; TG5; unclassified	0	0.0270636	0.0541272	0.0270636	0.0541272	0.0541272	0	0.0541272	0.0541272	0.0811908	0.0541272	0.0811908		OTU0130	Bacteria; Fusobacteria; Fusobacteria; Fusobacteriales; Fusobacteriaceae; Streptobacillus; unclassified	0	0.114318	0.0571592	0.114318	0	0.0285796	0.0285796	0.0285796	0.0285796	0.0285796	0	0		OTU130	Bacteria; Proteobacteria; Betaproteobacteria; Neisseriales; Neisseriaceae; Neisseria; unclassified	0	0.027571	0
OTU131	Bacteria; Proteobacteria; Gammaproteobacteria; Pasteurellales; Pasteurellaceae; Haemophilus; Haemophilus parainfluenzae	0.027571	0.055142	0	0.082713	0.110284	0.082713	0.082713	0	0.082713	0	0	0.082713		OTU131	Bacteria; Firmicutes; Clostridia; Clostridiales; Lachnospiraceae; unclassified; unclassified	0.0811908	0.0541272	0.0811908	0.0541272	0.0811908	0	0.0811908	0.0270636	0.0270636	0	0	0.0541272		OTU0131	Bacteria; Proteobacteria; Betaproteobacteria; Neisseriales; Neisseriaceae; Kingella; Kingella oralis	0.0285796	0.0571592	0.0285796	0	0.0571592	0.0285796	0.0285796	0	0.0285796	0.0285796	0.114318	0		OTU131	Bacteria; Proteobacteria; Gammaproteobacteria; Pasteurellales; Pasteurellaceae; Haemophilus; Haemophilus parainfluenzae	0	0.027571	0
OTU132	Bacteria; Bacteroidetes; Flavobacteria; Flavobacteriales; Flavobacteriaceae; Capnocytophaga; Capnocytophaga ochracea	0	0	0.055142	0.055142	0	0.055142	0.055142	0.165426	0.027571	0.027571	0.082713	0.027571		OTU132	Bacteria; Firmicutes; Bacilli; Lactobacillales; Streptococcaceae; Streptococcus; Streptococcus constellatus	0.162382	0	0.0811908	0	0.0541272	0.0811908	0.0541272	0	0	0.0270636	0.0541272	0		OTU0132	Bacteria; Firmicutes; Clostridia; Clostridiales; ClostridialesFamilyXIII.IncertaeSedis; Eubacterium; unclassified	0.0571592	0.0285796	0	0.0285796	0.0285796	0.0285796	0.0857388	0.0285796	0.0571592	0.0285796	0.0285796	0		OTU132	Bacteria; Proteobacteria; Betaproteobacteria; Burkholderiales; Burkholderiaceae; Lautropia; unclassified	0	0.027571	0
OTU133	Bacteria; Fusobacteria; Fusobacteria; Fusobacteriales; Fusobacteriaceae; Leptotrichia; unclassified	0	0.110284	0.055142	0.082713	0.192997	0.027571	0	0	0	0	0	0.082713		OTU133	Bacteria; Actinobacteria; Actinobacteria; Actinomycetales; Propionibacteriaceae; unclassified; unclassified	0.0541272	0	0	0.0541272	0	0	0.0811908	0.0270636	0.0811908	0.0541272	0.108254	0.0541272		OTU0133	Bacteria; Bacteroidetes; Bacteroidia; Bacteroidales; Prevotellaceae; Prevotella; Prevotella oulorum	0.0285796	0	0	0.0285796	0	0	0.0285796	0.0285796	0.114318	0.0571592	0.0571592	0.0285796		OTU133	Bacteria; Proteobacteria; Betaproteobacteria; Neisseriales; Neisseriaceae; Neisseria; unclassified	0	0	0.055142
OTU134	Bacteria; Bacteroidetes; Bacteroidia; Bacteroidales; Porphyromonadaceae; Tannerella; unclassified	0	0.027571	0	0.055142	0	0.027571	0	0	0.110284	0.110284	0.137855	0.055142		OTU134	Bacteria; Firmicutes; Clostridia; Clostridiales; ClostridialesFamilyXIII.IncertaeSedis; Eubacterium; unclassified	0.0541272	0	0	0.0270636	0.0270636	0.0541272	0.0541272	0.0270636	0.0270636	0.0811908	0.0541272	0.0811908		OTU0134	Bacteria; Actinobacteria; Actinobacteria; Actinomycetales; Micrococcaceae; unclassified; unclassified	0	0	0	0.0571592	0.114318	0	0.0571592	0	0.0285796	0	0.0285796	0.0857388		OTU134	Bacteria; Proteobacteria; Betaproteobacteria; Burkholderiales; Burkholderiaceae; Lautropia; unclassified	0	0	0.027571
OTU135	Bacteria; Firmicutes; Clostridia; Clostridiales; Lachnospiraceae; unclassified; unclassified	0	0.027571	0.055142	0.055142	0.055142	0.055142	0	0.027571	0.082713	0	0.110284	0.055142		OTU135	Bacteria; Fusobacteria; Fusobacteria; Fusobacteriales; Fusobacteriaceae; Leptotrichia; unclassified	0	0.162382	0.0270636	0.108254	0.0541272	0.0541272	0.0270636	0	0.0541272	0	0	0		OTU0135	Bacteria; Proteobacteria; Betaproteobacteria; Neisseriales; Neisseriaceae; Neisseria; unclassified	0	0.0285796	0	0.0857388	0.142898	0	0.0285796	0.0285796	0.0571592	0	0	0		OTU135	Bacteria; Proteobacteria; Betaproteobacteria; Neisseriales; Neisseriaceae; Neisseria; unclassified	0	0	0.027571
OTU136	Bacteria; Proteobacteria; Gammaproteobacteria; Pasteurellales; Pasteurellaceae; Haemophilus; Haemophilus parainfluenzae	0.055142	0.110284	0	0.055142	0.055142	0.055142	0.027571	0.027571	0.027571	0	0.027571	0.055142		OTU136	Bacteria; Bacteroidetes; Bacteroidia; Bacteroidales; Porphyromonadaceae; Tannerella; unclassified	0	0.0270636	0.0270636	0.0270636	0.0270636	0.0541272	0.0270636	0.0811908	0.0541272	0.0541272	0.0811908	0.0270636		OTU0136	Bacteria; Bacteroidetes; Flavobacteria; Flavobacteriales; Flavobacteriaceae; Capnocytophaga; Capnocytophaga ochracea	0	0.0285796	0	0	0	0.0285796	0.0285796	0.0285796	0.114318	0.0285796	0.0285796	0.0857388		OTU136	Bacteria; Proteobacteria; Gammaproteobacteria; Pasteurellales; Pasteurellaceae; unclassified; unclassified	0	0	0
OTU137	Bacteria; Firmicutes; Clostridia; Clostridiales; ClostridialesFamilyXIII.IncertaeSedis; Eubacterium; unclassified	0.027571	0	0	0.027571	0	0.055142	0.055142	0.027571	0.082713	0.082713	0.027571	0.082713		OTU137	Bacteria; Firmicutes; Bacilli; Lactobacillales; Streptococcaceae; Streptococcus; unclassified	0.216509	0.0270636	0.0541272	0.0270636	0	0.135318	0	0	0	0	0	0.0270636		OTU0137	Bacteria; Bacteroidetes; Flavobacteria; Flavobacteriales; Flavobacteriaceae; Capnocytophaga; Capnocytophaga ochracea	0	0	0.0285796	0	0	0	0.0285796	0.0285796	0.142898	0.0571592	0.0285796	0.0571592		OTU137	Bacteria; Proteobacteria; Gammaproteobacteria; Pasteurellales; Pasteurellaceae; Haemophilus; Haemophilus parainfluenzae	0	0	0
OTU138	Bacteria; Firmicutes; Clostridia; Clostridiales; Veillonellaceae; Dialister; Dialister invisus	0.027571	0.082713	0.027571	0.055142	0.110284	0.055142	0.055142	0.027571	0	0	0	0.027571		OTU138	Bacteria; Spirochaetes; Spirochaetes; Spirochaetales; Spirochaetaceae; Treponema; Treponema socranskii	0	0.0270636	0	0	0	0.0270636	0.0270636	0.0541272	0.189445	0.0541272	0.0270636	0.0811908		OTU0138	Bacteria; Firmicutes; Clostridia; Clostridiales; Veillonellaceae; Selenomonas; unclassified	0	0	0	0.0285796	0	0	0.0571592	0.0857388	0.0285796	0.0571592	0	0.114318		OTU138	Bacteria; Proteobacteria; Gammaproteobacteria; Pasteurellales; Pasteurellaceae; unclassified; unclassified	0	0	0
OTU139	Bacteria; Actinobacteria; Actinobacteria; Actinomycetales; Propionibacteriaceae; unclassified; unclassified	0.055142	0	0	0.027571	0	0	0.055142	0.027571	0.055142	0.055142	0.165426	0.027571		OTU139	Bacteria; unclassified; unclassified; unclassified; unclassified; unclassified; unclassified	0	0	0	0.0541272	0.0270636	0.0541272	0	0.135318	0.0541272	0.0811908	0.0270636	0.0541272		OTU0139	Bacteria; Actinobacteria; Actinobacteria; Actinomycetales; Corynebacteriaceae; Corynebacterium; Corynebacterium matruchotii	0.0285796	0	0.0285796	0	0.0285796	0	0.0285796	0.142898	0	0.0571592	0	0.0571592		OTU139	Bacteria; Bacteroidetes; Bacteroidia; Bacteroidales; Prevotellaceae; Prevotella; unclassified	0.192997	0.110284	0.082713
OTU140	Bacteria; Bacteroidetes; Bacteroidia; Bacteroidales; Porphyromonadaceae; Tannerella; unclassified	0.027571	0.027571	0.027571	0	0	0.055142	0.055142	0.055142	0.027571	0.027571	0.082713	0.082713		OTU140	Bacteria; Firmicutes; Clostridia; Clostridiales; Lachnospiraceae; Catonella; unclassified	0	0.0541272	0.0270636	0.0541272	0.0541272	0.0270636	0.0270636	0.0270636	0	0.135318	0.0811908	0		OTU0140	Bacteria; Firmicutes; Clostridia; Clostridiales; Veillonellaceae; Dialister; Dialister invisus	0.0285796	0.0857388	0.0285796	0	0.0285796	0	0.0857388	0.0285796	0	0.0571592	0	0.0285796		OTU140	Bacteria; Bacteroidetes; Bacteroidia; Bacteroidales; Prevotellaceae; Prevotella; unclassified	0.027571	0.082713	0
OTU141	Bacteria; Firmicutes; Clostridia; Clostridiales; Peptococcaceae; Peptococcus; unclassified	0.055142	0.137855	0.055142	0	0.027571	0.027571	0	0.055142	0.055142	0	0	0.027571		OTU141	Bacteria; Firmicutes; Clostridia; Clostridiales; Veillonellaceae; Selenomonas; Selenomonas noxia	0	0	0	0.0270636	0.0270636	0.0270636	0	0.0270636	0.0270636	0.108254	0.162382	0.0541272		OTU0141	Bacteria; Synergistetes; Synergistia; Synergistales; Dethiosulfovibrionaceae; TG5; unclassified	0.0285796	0.0285796	0	0.0285796	0.0571592	0	0.0285796	0.0285796	0.0571592	0.0285796	0.0857388	0		OTU141	Bacteria; Bacteroidetes; Bacteroidia; Bacteroidales; Prevotellaceae; Prevotella; unclassified	0	0.082713	0
OTU142	Bacteria; Bacteroidetes; Bacteroidia; Bacteroidales; Prevotellaceae; Prevotella; Prevotella pallens	0.055142	0.055142	0.027571	0.055142	0	0.082713	0	0.027571	0.055142	0	0.055142	0.027571		OTU142	Bacteria; Fusobacteria; Fusobacteria; Fusobacteriales; Fusobacteriaceae; Leptotrichia; unclassified	0	0.108254	0.0541272	0	0.0541272	0.0270636	0.0541272	0.0270636	0.0811908	0	0.0270636	0.0270636		OTU0142	Bacteria; Firmicutes; Bacilli; Lactobacillales; Streptococcaceae; Streptococcus; unclassified	0.114318	0	0	0.0571592	0.0285796	0.0857388	0	0	0.0285796	0	0	0.0285796		OTU142	Bacteria; Bacteroidetes; Bacteroidia; Bacteroidales; Porphyromonadaceae; Tannerella; Tannerella forsythia	0.027571	0.027571	0
OTU143	Bacteria; Spirochaetes; Spirochaetes; Spirochaetales; Spirochaetaceae; Treponema; Treponema socranskii	0	0	0	0	0	0	0.027571	0.055142	0.110284	0.165426	0.055142	0.027571		OTU143	Bacteria; Firmicutes; Clostridia; Clostridiales; Peptococcaceae; Peptococcus; unclassified	0.0811908	0.0811908	0.0541272	0.108254	0.0270636	0.0270636	0.0270636	0	0	0	0.0270636	0		OTU0143	Bacteria; Proteobacteria; Betaproteobacteria; Neisseriales; Neisseriaceae; Eikenella; Eikenella corrodens	0.0285796	0	0.0285796	0.0571592	0.0571592	0	0.0571592	0	0	0.0285796	0.0285796	0.0571592		OTU143	Bacteria; unclassified; unclassified; unclassified; unclassified; unclassified; unclassified	0	0	0
OTU144	Bacteria; Fusobacteria; Fusobacteria; Fusobacteriales; Fusobacteriaceae; Streptobacillus; unclassified	0	0.027571	0.055142	0.165426	0.055142	0.027571	0.027571	0.027571	0	0.027571	0	0.027571		OTU144	Bacteria; Bacteroidetes; Bacteroidia; Bacteroidales; Prevotellaceae; Prevotella; Prevotella pallens	0.0541272	0.0270636	0.0270636	0.0270636	0.0270636	0.135318	0	0.0270636	0.0270636	0	0.0270636	0.0541272		OTU0144	Bacteria; Bacteroidetes; Bacteroidia; Bacteroidales; Porphyromonadaceae; Porphyromonas; unclassified	0	0	0.0285796	0	0.0285796	0.0285796	0.0285796	0	0.0571592	0.0285796	0.0857388	0.0571592		OTU144	Bacteria; Bacteroidetes; Bacteroidia; Bacteroidales; Prevotellaceae; Prevotella; Prevotella nigrescens	0.578991	0.661704	0.248139
OTU145	Bacteria; Proteobacteria; Betaproteobacteria; unclassified; unclassified; unclassified; unclassified	0	0.082713	0.055142	0.055142	0	0.055142	0.027571	0.027571	0.055142	0.027571	0.027571	0.027571		OTU145	Bacteria; Fusobacteria; Fusobacteria; Fusobacteriales; Fusobacteriaceae; Streptobacillus; unclassified	0	0.0811908	0.0541272	0.0811908	0.0541272	0.0270636	0.0270636	0.0270636	0.0270636	0.0270636	0	0.0270636		OTU0145	Bacteria; Firmicutes; Clostridia; Clostridiales; Catabacteriaceae; unclassified; unclassified	0.0285796	0	0	0	0.0285796	0	0.0285796	0.0285796	0.0571592	0.0285796	0.0571592	0.0857388		OTU145	Bacteria; Bacteroidetes; Bacteroidia; Bacteroidales; Porphyromonadaceae; Porphyromonas; Porphyromonas endodontalis	0.082713	0.165426	0
OTU146	Bacteria; unclassified; unclassified; unclassified; unclassified; unclassified; unclassified	0	0	0	0.027571	0.027571	0.082713	0	0.110284	0.082713	0.027571	0	0.055142		OTU146	Bacteria; Firmicutes; Clostridia; Clostridiales; Lachnospiraceae; unclassified; unclassified	0.0270636	0.0270636	0.0541272	0.0811908	0.0270636	0	0	0	0.0270636	0.0811908	0.0811908	0.0270636		OTU0146	Bacteria; Bacteroidetes; Bacteroidia; Bacteroidales; Porphyromonadaceae; Tannerella; unclassified	0	0.0285796	0	0	0.0285796	0.0571592	0	0	0.0857388	0.0571592	0.0857388	0		OTU146	Bacteria; Bacteroidetes; Flavobacteria; Flavobacteriales; Flavobacteriaceae; Capnocytophaga; unclassified	0.248139	0.248139	0
OTU147	Bacteria; Actinobacteria; Actinobacteria; Actinomycetales; Corynebacteriaceae; Corynebacterium; Corynebacterium matruchotii	0	0	0	0.027571	0.027571	0.055142	0	0	0.082713	0.055142	0.082713	0.082713		OTU147	Bacteria; Proteobacteria; Betaproteobacteria; Burkholderiales; Burkholderiaceae; Lautropia; unclassified	0	0.135318	0	0.0541272	0	0	0	0.0270636	0.0811908	0.0541272	0.0270636	0.0541272		OTU0147	Bacteria; Firmicutes; Clostridia; Clostridiales; unclassified; unclassified; unclassified	0	0.0857388	0	0.0857388	0	0.0857388	0	0	0.0571592	0	0	0.0285796		OTU147	Bacteria; Bacteroidetes; Bacteroidia; Bacteroidales; Porphyromonadaceae; Tannerella; unclassified	0	0.027571	0.027571
OTU148	Bacteria; Synergistetes; Synergistia; Synergistales; Dethiosulfovibrionaceae; TG5; unclassified	0.027571	0	0	0.027571	0.082713	0	0.055142	0.027571	0.055142	0.027571	0.082713	0		OTU148	Bacteria; Firmicutes; Clostridia; Clostridiales; ClostridialesFamilyXIII.IncertaeSedis; Eubacterium; unclassified	0.0270636	0.0811908	0.0270636	0	0.108254	0	0.0270636	0	0.0270636	0.0270636	0.0541272	0.0270636		OTU0148	Bacteria; Firmicutes; Clostridia; Clostridiales; Veillonellaceae; Selenomonas; unclassified	0	0	0	0.0571592	0	0.0285796	0.0571592	0.0285796	0.0857388	0.0285796	0.0285796	0.0285796		OTU148	Bacteria; Proteobacteria; Gammaproteobacteria; Pasteurellales; Pasteurellaceae; Haemophilus; Haemophilus influenzae	0	0	0
OTU149	Bacteria; Fusobacteria; Fusobacteria; Fusobacteriales; Fusobacteriaceae; Fusobacterium; unclassified	0.027571	0.027571	0.027571	0.027571	0	0.027571	0.110284	0	0.027571	0.027571	0.027571	0.055142		OTU149	Bacteria; Firmicutes; Clostridia; Clostridiales; unclassified; unclassified; unclassified	0	0.0270636	0.0270636	0.0270636	0	0.0270636	0.0811908	0	0.0541272	0.0811908	0.0270636	0.0541272		OTU0149	Bacteria; Firmicutes; Clostridia; Clostridiales; Peptococcaceae; Peptococcus; unclassified	0.0857388	0.0857388	0.0571592	0	0	0	0	0.0571592	0.0285796	0.0285796	0	0		OTU149	Bacteria; Proteobacteria; Betaproteobacteria; Burkholderiales; unclassified; unclassified; unclassified	0	0	0
OTU150	Bacteria; Firmicutes; Clostridia; Clostridiales; Lachnospiraceae; Catonella; unclassified	0	0.082713	0.027571	0	0.055142	0.027571	0.027571	0.027571	0	0.082713	0.055142	0		OTU150	Bacteria; Proteobacteria; Betaproteobacteria; Neisseriales; Neisseriaceae; Neisseria; unclassified	0	0	0	0.0270636	0.162382	0.0270636	0.0270636	0.0270636	0.0811908	0	0.0270636	0.0270636		OTU0150	Bacteria; Bacteroidetes; Flavobacteria; Flavobacteriales; Flavobacteriaceae; Capnocytophaga; unclassified	0	0.0285796	0	0.0285796	0	0	0	0.0857388	0.0285796	0	0.0857388	0.0571592		OTU150	Bacteria; Proteobacteria; Betaproteobacteria; Neisseriales; Neisseriaceae; Neisseria; Neisseria subflava	0	0	0
OTU151	Bacteria; Firmicutes; Clostridia; Clostridiales; Veillonellaceae; Selenomonas; unclassified	0	0	0	0.027571	0	0	0.027571	0.082713	0.055142	0.082713	0	0.110284		OTU151	Bacteria; Bacteroidetes; Bacteroidia; Bacteroidales; Prevotellaceae; Prevotella; unclassified	0.0811908	0	0	0.0270636	0	0.0270636	0.0270636	0.0270636	0.0541272	0.0270636	0.108254	0		OTU0151	Bacteria; Firmicutes; Clostridia; Clostridiales; ClostridialesFamilyXIII.IncertaeSedis; Eubacterium; unclassified	0	0	0.0285796	0.0571592	0.0285796	0.0571592	0.0285796	0	0.0285796	0.0285796	0.0571592	0		OTU151	Bacteria; Bacteroidetes; Bacteroidia; Bacteroidales; Prevotellaceae; Prevotella; unclassified	0	0	0
OTU152	Bacteria; Fusobacteria; Fusobacteria; Fusobacteriales; Fusobacteriaceae; Leptotrichia; unclassified	0	0.082713	0.055142	0.055142	0.027571	0.027571	0	0	0.027571	0.055142	0.055142	0		OTU152	Bacteria; Actinobacteria; Actinobacteria; Actinomycetales; Corynebacteriaceae; Corynebacterium; Corynebacterium matruchotii	0	0.0270636	0	0	0	0.0270636	0	0.0270636	0.0541272	0.0541272	0.108254	0.0811908		OTU0152	Bacteria; Firmicutes; Bacilli; Lactobacillales; Streptococcaceae; Streptococcus; unclassified	0	0.0571592	0.0285796	0.142898	0.0571592	0	0	0	0	0	0	0		OTU152	Bacteria; Bacteroidetes; Bacteroidia; Bacteroidales; Prevotellaceae; Prevotella; unclassified	0.055142	0.082713	0.027571
OTU153	Bacteria; Bacteroidetes; Bacteroidia; Bacteroidales; Prevotellaceae; Prevotella; unclassified	0	0.055142	0.027571	0.137855	0.027571	0	0.027571	0.027571	0.027571	0.027571	0.027571	0		OTU153	Bacteria; Synergistetes; Synergistia; Synergistales; Dethiosulfovibrionaceae; TG5; unclassified	0.0270636	0	0	0.0270636	0.0270636	0	0.0541272	0.0270636	0.0811908	0.0270636	0.108254	0		OTU0153	Bacteria; TM7; TM7-3; EW055; unclassified; unclassified; unclassified	0.0571592	0.0285796	0	0.0285796	0	0	0.0285796	0.0571592	0.0285796	0.0571592	0	0		OTU153	Bacteria; Bacteroidetes; Bacteroidia; Bacteroidales; Porphyromonadaceae; Tannerella; unclassified	0	0	0
OTU154	Bacteria; Bacteroidetes; Bacteroidia; Bacteroidales; Prevotellaceae; Prevotella; unclassified	0.082713	0.027571	0	0.027571	0	0.027571	0.027571	0.055142	0.027571	0.027571	0.055142	0.027571		OTU154	Bacteria; Proteobacteria; Gammaproteobacteria; Pasteurellales; Pasteurellaceae; Haemophilus; Haemophilus parainfluenzae	0.0811908	0.108254	0	0.0270636	0.0270636	0	0.0541272	0	0.0270636	0	0	0.0270636		OTU0154	Bacteria; Spirochaetes; Spirochaetes; Spirochaetales; Spirochaetaceae; Treponema; unclassified	0	0.0285796	0	0.0285796	0	0	0.0285796	0	0.142898	0	0.0285796	0.0285796		OTU154	Bacteria; Proteobacteria; Gammaproteobacteria; Pasteurellales; Pasteurellaceae; Haemophilus; Haemophilus parainfluenzae	0	0	0
OTU155	Bacteria; Spirochaetes; Spirochaetes; Spirochaetales; Spirochaetaceae; Treponema; Treponema socranskii	0.027571	0	0.027571	0	0	0	0	0.110284	0.027571	0	0	0.165426		OTU155	Bacteria; Firmicutes; Bacilli; Gemellales; Gemellaceae; Gemella; unclassified	0	0	0.0541272	0.0541272	0.108254	0.0811908	0.0270636	0.0270636	0	0	0	0		OTU0155	Bacteria; Bacteroidetes; Bacteroidia; Bacteroidales; Prevotellaceae; Prevotella; Prevotella pallens	0.0571592	0	0.0285796	0	0.0285796	0.0571592	0	0.0285796	0.0285796	0	0	0.0571592		OTU155	Bacteria; Proteobacteria; Betaproteobacteria; Burkholderiales; Burkholderiaceae; Lautropia; unclassified	0	0	0
OTU156	Bacteria; Firmicutes; Bacilli; Gemellales; Gemellaceae; Gemella; unclassified	0.027571	0.055142	0.055142	0.055142	0.055142	0.055142	0	0.027571	0	0	0	0.027571		OTU156	Bacteria; Proteobacteria; Gammaproteobacteria; Pasteurellales; Pasteurellaceae; Haemophilus; Haemophilus parainfluenzae	0	0.0811908	0	0.0270636	0.0811908	0.0270636	0.0541272	0	0.0270636	0	0	0.0541272		OTU0156	Bacteria; Bacteroidetes; Flavobacteria; Flavobacteriales; Flavobacteriaceae; Capnocytophaga; unclassified	0	0.0571592	0	0	0.0285796	0.0285796	0.0285796	0.114318	0	0	0	0.0285796		OTU156	Bacteria; Proteobacteria; Betaproteobacteria; Neisseriales; Neisseriaceae; Kingella; Kingella kingae	0	0	0
OTU157	Bacteria; Firmicutes; Bacilli; Lactobacillales; Streptococcaceae; Streptococcus; unclassified	0.027571	0.055142	0	0.082713	0	0	0	0.027571	0.055142	0	0	0.110284		OTU157	Bacteria; Firmicutes; Clostridia; Clostridiales; Veillonellaceae; Selenomonas; unclassified	0	0.0270636	0	0	0	0	0.0541272	0.0811908	0.0270636	0.0811908	0	0.0811908		OTU0157	Bacteria; Proteobacteria; Betaproteobacteria; Neisseriales; Neisseriaceae; Neisseria; unclassified	0.0285796	0	0	0.0857388	0	0.0285796	0	0.0571592	0	0.0285796	0.0285796	0		OTU157	Bacteria; Proteobacteria; Betaproteobacteria; Neisseriales; Neisseriaceae; Neisseria; unclassified	0	0	0
OTU158	Bacteria; Proteobacteria; Betaproteobacteria; Neisseriales; Neisseriaceae; Neisseria; unclassified	0	0	0	0.055142	0.082713	0.055142	0	0.027571	0.055142	0.055142	0	0.027571		OTU158	Bacteria; Proteobacteria; Betaproteobacteria; unclassified; unclassified; unclassified; unclassified	0	0.0270636	0.0270636	0.0270636	0.0541272	0.108254	0	0.0270636	0.0541272	0	0	0.0270636		OTU0158	Bacteria; Firmicutes; Bacilli; Lactobacillales; Carnobacteriaceae; Granulicatella; unclassified	0.0857388	0	0	0	0	0	0.0571592	0.0285796	0.0285796	0	0.0285796	0.0285796		OTU158	Bacteria; Proteobacteria; Betaproteobacteria; Burkholderiales; Comamonadaceae; Hylemonella; unclassified	0	0	0
OTU159	Bacteria; Fusobacteria; Fusobacteria; Fusobacteriales; Fusobacteriaceae; Fusobacterium; Fusobacterium necrophorum	0.082713	0.055142	0.055142	0	0.055142	0.027571	0	0.027571	0.027571	0	0	0.027571		OTU159	Bacteria; Firmicutes; Clostridia; Clostridiales; Veillonellaceae; Selenomonas; unclassified	0.0270636	0.0270636	0	0	0	0	0.0270636	0.0811908	0.0811908	0	0.0541272	0.0541272		OTU0159	Bacteria; Fusobacteria; Fusobacteria; Fusobacteriales; Fusobacteriaceae; Fusobacterium; unclassified	0.0285796	0.0285796	0.0571592	0	0.0285796	0.0285796	0	0.0571592	0	0	0.0285796	0		OTU159	Bacteria; Proteobacteria; Betaproteobacteria; Neisseriales; Neisseriaceae; Neisseria; unclassified	0	0	0
OTU160	Bacteria; Tenericutes; Erysipelotrichi; Erysipelotrichales; Erysipelotrichaceae; Bulleidia; Solobacterium moorei	0.027571	0.027571	0.027571	0.027571	0	0.027571	0.082713	0	0	0.110284	0	0		OTU160	Bacteria; Bacteroidetes; Bacteroidia; Bacteroidales; Prevotellaceae; Prevotella; unclassified	0.0541272	0.0270636	0.0270636	0	0	0	0.0270636	0	0.0541272	0.0541272	0.0270636	0.0541272		OTU0160	Bacteria; Bacteroidetes; Bacteroidia; Bacteroidales; Prevotellaceae; Prevotella; unclassified	0.0285796	0.0571592	0	0	0	0.0285796	0	0.0285796	0	0.0571592	0.0571592	0		OTU160	Bacteria; Bacteroidetes; Bacteroidia; Bacteroidales; Prevotellaceae; Prevotella; unclassified	0	0	0
OTU161	Bacteria; Bacteroidetes; Bacteroidia; Bacteroidales; Prevotellaceae; Prevotella; unclassified	0	0.082713	0	0	0	0	0.082713	0	0.027571	0.110284	0	0.027571		OTU161	Bacteria; Spirochaetes; Spirochaetes; Spirochaetales; Spirochaetaceae; Treponema; Treponema socranskii	0	0.0270636	0	0	0	0	0	0	0.0541272	0.216509	0	0.0270636		OTU0161	Bacteria; Tenericutes; Erysipelotrichi; Erysipelotrichales; Erysipelotrichaceae; Bulleidia; Solobacterium moorei	0.0571592	0.0285796	0.0285796	0	0	0.0285796	0	0	0	0.0571592	0	0.0571592		OTU161	Bacteria; Proteobacteria; Betaproteobacteria; Burkholderiales; Burkholderiaceae; unclassified; unclassified	0	0	0
OTU162	Bacteria; Spirochaetes; Spirochaetes; Spirochaetales; Spirochaetaceae; Treponema; unclassified	0	0	0	0	0	0	0	0.137855	0.027571	0.055142	0.055142	0.055142		OTU162	Bacteria; Fusobacteria; Fusobacteria; Fusobacteriales; Fusobacteriaceae; Fusobacterium; Fusobacterium necrophorum	0.0811908	0.0270636	0.0541272	0.0270636	0.0270636	0	0.0270636	0.0270636	0.0270636	0	0	0.0270636		OTU0162	Bacteria; Firmicutes; Bacilli; Lactobacillales; Streptococcaceae; Streptococcus; unclassified	0.0285796	0.0571592	0	0.0285796	0.0285796	0.0571592	0	0	0	0	0	0.0571592		OTU162	Bacteria; Bacteroidetes; Bacteroidia; Bacteroidales; Prevotellaceae; Prevotella; Prevotella melaninogenica	1.98511	2.50896	1.46126
OTU163	Bacteria; Firmicutes; Clostridia; Clostridiales; Catabacteriaceae; unclassified; unclassified	0.027571	0.027571	0	0	0.027571	0	0	0.027571	0	0.082713	0.082713	0.055142		OTU163	Bacteria; Proteobacteria; Betaproteobacteria; Neisseriales; Neisseriaceae; Neisseria; unclassified	0	0.135318	0	0.0270636	0.0270636	0.0270636	0.0270636	0.0270636	0.0270636	0.0270636	0	0		OTU0163	Bacteria; Bacteroidetes; Bacteroidia; Bacteroidales; Prevotellaceae; Prevotella; unclassified	0	0	0	0	0	0.0285796	0.0285796	0.0285796	0	0.0857388	0.0285796	0.0571592		OTU163	Bacteria; Bacteroidetes; Flavobacteria; Flavobacteriales; Flavobacteriaceae; Capnocytophaga; unclassified	0	0.110284	0
OTU164	Bacteria; Proteobacteria; Betaproteobacteria; Neisseriales; Neisseriaceae; Kingella; Kingella oralis	0.027571	0.027571	0.027571	0.027571	0.027571	0.027571	0	0	0.027571	0.027571	0.055142	0.055142		OTU164	Bacteria; Spirochaetes; Spirochaetes; Spirochaetales; Spirochaetaceae; Treponema; unclassified	0	0	0	0	0	0.0270636	0	0.135318	0	0.0541272	0.0811908	0.0270636		OTU0164	Bacteria; Bacteroidetes; Bacteroidia; Bacteroidales; Prevotellaceae; Prevotella; unclassified	0.0285796	0.0285796	0	0	0	0	0.0285796	0	0.0285796	0.114318	0	0.0285796		OTU164	Bacteria; Bacteroidetes; Bacteroidia; Bacteroidales; Prevotellaceae; Prevotella; unclassified	0.192997	0.606562	0.192997
OTU165	Bacteria; Actinobacteria; Actinobacteria; Actinomycetales; Corynebacteriaceae; Corynebacterium; Corynebacterium matruchotii	0.027571	0	0.027571	0	0.027571	0	0.055142	0.137855	0	0.055142	0	0		OTU165	Bacteria; Bacteroidetes; Bacteroidia; Bacteroidales; Porphyromonadaceae; Porphyromonas; unclassified	0	0	0.0270636	0	0.0811908	0.0270636	0	0.0270636	0.0541272	0.0270636	0.0541272	0.0270636		OTU0165	Bacteria; Actinobacteria; Actinobacteria; Actinomycetales; Corynebacteriaceae; Corynebacterium; Corynebacterium matruchotii	0	0.0285796	0	0	0	0.0285796	0.0285796	0.0285796	0.0285796	0.0285796	0.0285796	0.0285796		OTU165	Bacteria; Bacteroidetes; Bacteroidia; Bacteroidales; Porphyromonadaceae; Tannerella; unclassified	0.027571	0	0
OTU166	Bacteria; Proteobacteria; Betaproteobacteria; Neisseriales; Neisseriaceae; Neisseria; unclassified	0	0.027571	0	0.137855	0	0	0	0	0	0.110284	0.027571	0		OTU166	Bacteria; Proteobacteria; Betaproteobacteria; Neisseriales; Neisseriaceae; Eikenella; Eikenella corrodens	0.0270636	0	0.0270636	0.0811908	0.0270636	0	0.0541272	0	0	0.0541272	0.0270636	0.0270636		OTU0166	Bacteria; Firmicutes; Clostridia; Clostridiales; Veillonellaceae; Selenomonas; unclassified	0	0.0285796	0	0	0.0285796	0	0	0.0571592	0.0571592	0	0.0571592	0		OTU166	Bacteria; Bacteroidetes; Bacteroidia; Bacteroidales; Prevotellaceae; Prevotella; unclassified	0	0.027571	0
OTU167	Bacteria; TM7; TM7-3; EW055; unclassified; unclassified; unclassified	0.055142	0	0	0.027571	0	0	0.027571	0.055142	0.027571	0.082713	0.027571	0		OTU167	Bacteria; Fusobacteria; Fusobacteria; Fusobacteriales; Fusobacteriaceae; Fusobacterium; unclassified	0	0.0270636	0	0	0	0	0.0270636	0.0811908	0.0541272	0	0.108254	0.0270636		OTU0167	Bacteria; Fusobacteria; Fusobacteria; Fusobacteriales; Fusobacteriaceae; Leptotrichia; unclassified	0	0.0857388	0.0285796	0.0571592	0	0	0	0	0	0.0285796	0.0285796	0		OTU167	Bacteria; Bacteroidetes; Bacteroidia; Bacteroidales; Porphyromonadaceae; Tannerella; unclassified	0	0.055142	0
OTU168	Bacteria; Bacteroidetes; Bacteroidia; Bacteroidales; Porphyromonadaceae; Tannerella; Tannerella forsythia	0.027571	0	0	0.027571	0	0	0.027571	0.082713	0.055142	0.027571	0.027571	0.027571		OTU168	Bacteria; Proteobacteria; Betaproteobacteria; Neisseriales; Neisseriaceae; Neisseria; unclassified	0.0270636	0.0541272	0	0.0270636	0	0.0270636	0.0270636	0.0811908	0.0270636	0.0270636	0.0270636	0		OTU0168	Bacteria; Tenericutes; Mollicutes; Mycoplasmatales; Mycoplasmataceae; Mycoplasma; unclassified	0.0285796	0.0285796	0.0285796	0	0.0285796	0.0857388	0.0285796	0	0	0	0	0		OTU168	Bacteria; Bacteroidetes; Bacteroidia; Bacteroidales; Porphyromonadaceae; Porphyromonas; unclassified	0.055142	0.055142	0.027571
OTU169	Bacteria; Fusobacteria; Fusobacteria; Fusobacteriales; Fusobacteriaceae; Fusobacterium; unclassified	0.027571	0.027571	0.055142	0	0.055142	0	0	0.055142	0.055142	0	0	0.027571		OTU169	Bacteria; Proteobacteria; Betaproteobacteria; Neisseriales; Neisseriaceae; Kingella; Kingella oralis	0.0270636	0.0811908	0.0270636	0.0270636	0.0270636	0.0270636	0	0	0.0270636	0.0270636	0.0270636	0.0270636		OTU0169	Bacteria; Fusobacteria; Fusobacteria; Fusobacteriales; Fusobacteriaceae; Fusobacterium; unclassified	0	0.0571592	0	0	0	0.0285796	0.0285796	0.0285796	0.0857388	0	0	0		OTU169	Bacteria; Bacteroidetes; Bacteroidia; Bacteroidales; Porphyromonadaceae; Porphyromonas; Porphyromonas endodontalis	0	0	0
OTU170	Bacteria; Bacteroidetes; Flavobacteria; Flavobacteriales; Flavobacteriaceae; Capnocytophaga; Capnocytophaga ochracea	0	0.027571	0	0.027571	0	0	0.027571	0.027571	0.082713	0.055142	0	0.027571		OTU170	Bacteria; Firmicutes; Clostridia; Clostridiales; unclassified; unclassified; unclassified	0	0.0541272	0	0.0270636	0	0.0811908	0.0270636	0	0.108254	0	0	0.0270636		OTU0170	Bacteria; Bacteroidetes; Bacteroidia; Bacteroidales; Porphyromonadaceae; Tannerella; unclassified	0	0.0285796	0	0	0	0.0285796	0	0	0.0285796	0	0.114318	0.0285796		OTU170	Bacteria; Bacteroidetes; Bacteroidia; Bacteroidales; Prevotellaceae; Prevotella; Prevotella oulorum	0	0	0
OTU171	Bacteria; Spirochaetes; Spirochaetes; Spirochaetales; Spirochaetaceae; Treponema; unclassified	0	0	0	0	0	0	0.110284	0.027571	0.055142	0.027571	0.027571	0.027571		OTU171	Bacteria; Spirochaetes; Spirochaetes; Spirochaetales; Spirochaetaceae; Treponema; Treponema socranskii	0.0270636	0	0.0270636	0	0	0	0	0.108254	0.0541272	0	0.0270636	0.0541272		OTU0171	Bacteria; Bacteroidetes; Flavobacteria; Flavobacteriales; Flavobacteriaceae; Capnocytophaga; unclassified	0	0	0	0	0.0285796	0	0.0285796	0	0.0571592	0.0285796	0.0285796	0.0285796		OTU171	Bacteria; Bacteroidetes; unclassified; unclassified; unclassified; unclassified; unclassified	0	0	0
OTU172	Bacteria; Proteobacteria; Betaproteobacteria; Burkholderiales; Burkholderiaceae; Lautropia; unclassified	0	0.192997	0	0	0	0	0	0	0	0.082713	0	0		OTU172	Bacteria; Firmicutes; Clostridia; Clostridiales; Peptococcaceae; Peptococcus; unclassified	0.0541272	0.0270636	0.0541272	0	0.0270636	0.0270636	0	0.0541272	0	0.0270636	0	0.0270636		OTU0172	Bacteria; Firmicutes; Bacilli; Gemellales; Gemellaceae; Gemella; unclassified	0.0285796	0.0285796	0.0285796	0.0285796	0.0285796	0.0285796	0	0	0	0	0	0.0285796		OTU172	Bacteria; Bacteroidetes; Flavobacteria; Flavobacteriales; Flavobacteriaceae; Capnocytophaga; Capnocytophaga sputigena	0.192997	0.441136	0.220568
OTU173	Bacteria; Proteobacteria; Gammaproteobacteria; Pasteurellales; Pasteurellaceae; Aggregatibacter; Aggregatibacter segnis	0.027571	0.082713	0.027571	0	0	0	0.027571	0	0	0.082713	0.027571	0		OTU173	Bacteria; Tenericutes; Mollicutes; Mycoplasmatales; Mycoplasmataceae; Mycoplasma; unclassified	0.0270636	0.0270636	0.0270636	0	0.0541272	0.108254	0.0270636	0	0	0	0.0270636	0		OTU0173	Bacteria; Fusobacteria; Fusobacteria; Fusobacteriales; Fusobacteriaceae; Leptotrichia; unclassified	0.0285796	0	0.0285796	0.0571592	0.0285796	0.0285796	0	0	0	0	0.0285796	0		OTU173	Bacteria; Bacteroidetes; Bacteroidia; Bacteroidales; Prevotellaceae; Prevotella; unclassified	0.248139	0.358423	0.192997
OTU174	Bacteria; Bacteroidetes; Bacteroidia; Bacteroidales; Porphyromonadaceae; Porphyromonas; unclassified	0	0	0.027571	0.027571	0.055142	0.027571	0	0.027571	0.027571	0	0.055142	0.027571		OTU174	Bacteria; Actinobacteria; Actinobacteria; Actinomycetales; Corynebacteriaceae; Corynebacterium; Corynebacterium matruchotii	0.0270636	0	0.0270636	0	0.0270636	0	0.0811908	0.108254	0	0.0270636	0	0		OTU0174	Bacteria; Bacteroidetes; Flavobacteria; Flavobacteriales; Flavobacteriaceae; Capnocytophaga; unclassified	0	0	0	0	0	0	0	0.0285796	0.0285796	0.0571592	0.0285796	0.0571592		OTU174	Bacteria; Bacteroidetes; Bacteroidia; Bacteroidales; Prevotellaceae; Prevotella; unclassified	0.137855	0.110284	0.248139
OTU175	Bacteria; Proteobacteria; Betaproteobacteria; Neisseriales; Neisseriaceae; Neisseria; unclassified	0.055142	0.055142	0	0.055142	0.027571	0	0	0.055142	0	0	0.027571	0		OTU175	Bacteria; Proteobacteria; Betaproteobacteria; Neisseriales; Neisseriaceae; Neisseria; unclassified	0.0270636	0.135318	0	0.0270636	0.0270636	0	0	0.0270636	0	0.0270636	0	0.0270636		OTU0175	Bacteria; Firmicutes; Clostridia; Clostridiales; Veillonellaceae; Selenomonas; Selenomonas sputigena	0.0285796	0.114318	0	0	0	0	0	0	0	0.0571592	0	0		OTU175	Bacteria; Bacteroidetes; Bacteroidia; Bacteroidales; Prevotellaceae; Prevotella; Prevotella histicola	0.110284	0.110284	0.082713
OTU176	Bacteria; Bacteroidetes; Flavobacteria; Flavobacteriales; Flavobacteriaceae; Capnocytophaga; unclassified	0	0.027571	0	0	0.027571	0.055142	0.027571	0.082713	0	0	0.027571	0.027571		OTU176	Bacteria; Bacteroidetes; Flavobacteria; Flavobacteriales; Flavobacteriaceae; Capnocytophaga; unclassified	0	0.0541272	0	0.0270636	0.0270636	0.0541272	0	0.108254	0	0	0.0270636	0		OTU0176	Bacteria; Spirochaetes; Spirochaetes; Spirochaetales; Spirochaetaceae; Treponema; unclassified	0	0	0	0.0285796	0	0	0.0571592	0.0285796	0.0285796	0.0285796	0.0285796	0		OTU176	Bacteria; Bacteroidetes; Bacteroidia; Bacteroidales; Porphyromonadaceae; Porphyromonas; unclassified	0	0.055142	1.10284
OTU177	Bacteria; Firmicutes; Clostridia; Clostridiales; Veillonellaceae; Selenomonas; Selenomonas sputigena	0.027571	0.082713	0	0.027571	0	0	0.027571	0.027571	0.027571	0.027571	0	0		OTU177	Bacteria; Bacteroidetes; Bacteroidia; Bacteroidales; Prevotellaceae; Prevotella; Prevotella oulorum	0.0270636	0	0	0.0270636	0	0	0.0270636	0	0.0541272	0.0541272	0.0270636	0.0811908		OTU0177	Bacteria; Firmicutes; Clostridia; Clostridiales; ClostridialesFamilyXIII.IncertaeSedis; Eubacterium; unclassified	0.0285796	0.0571592	0	0	0.0285796	0.0285796	0	0	0	0.0571592	0	0		OTU177	Bacteria; Bacteroidetes; unclassified; unclassified; unclassified; unclassified; unclassified	0	0.110284	0.027571
OTU178	Bacteria; Tenericutes; Mollicutes; Mycoplasmatales; Mycoplasmataceae; Mycoplasma; unclassified	0.027571	0.082713	0.027571	0	0.055142	0.027571	0.027571	0	0	0	0	0		OTU178	Bacteria; Firmicutes; Clostridia; Clostridiales; Catabacteriaceae; unclassified; unclassified	0.0270636	0.0270636	0	0	0.0270636	0	0	0	0.0541272	0.0811908	0.0541272	0.0270636		OTU0178	Bacteria; Bacteroidetes; Bacteroidia; Bacteroidales; Porphyromonadaceae; Tannerella; unclassified	0	0.0285796	0	0.0285796	0	0.0285796	0	0	0.0285796	0	0.0857388	0		OTU178	Bacteria; Bacteroidetes; Bacteroidia; Bacteroidales; Prevotellaceae; Prevotella; unclassified	0.110284	0.27571	0.165426
OTU179	Bacteria; Tenericutes; Mollicutes; Mycoplasmatales; Mycoplasmataceae; Mycoplasma; unclassified	0	0	0	0	0.027571	0.055142	0.027571	0.027571	0.027571	0	0.082713	0		OTU179	Bacteria; Bacteroidetes; Bacteroidia; Bacteroidales; Porphyromonadaceae; Tannerella; Tannerella forsythia	0.0270636	0	0	0	0	0	0.0270636	0.0811908	0.0541272	0.0270636	0.0541272	0.0270636		OTU0179	Bacteria; Firmicutes; Clostridia; Clostridiales; Veillonellaceae; Dialister; Dialister pneumosintes	0.0285796	0.0571592	0	0.0285796	0.0285796	0	0	0	0.0285796	0.0285796	0	0		OTU179	Bacteria; Bacteroidetes; Flavobacteria; Flavobacteriales; Flavobacteriaceae; Capnocytophaga; unclassified	0	0.082713	0.027571
OTU180	Bacteria; Firmicutes; Clostridia; Clostridiales; ClostridialesFamilyXIII.IncertaeSedis; Eubacterium; unclassified	0	0	0.027571	0.055142	0	0.027571	0.055142	0	0.027571	0.027571	0.027571	0		OTU180	Bacteria; Bacteroidetes; Bacteroidia; Bacteroidales; Porphyromonadaceae; Tannerella; unclassified	0	0.0270636	0	0.0270636	0.0270636	0	0	0	0.0811908	0.0541272	0.0811908	0		OTU0180	Bacteria; Firmicutes; Clostridia; Clostridiales; Veillonellaceae; Selenomonas; unclassified	0.0285796	0.0285796	0	0	0	0	0.0285796	0.0285796	0.0285796	0	0	0.0285796		OTU180	Bacteria; Bacteroidetes; Flavobacteria; Flavobacteriales; Flavobacteriaceae; Capnocytophaga; Capnocytophaga ochracea	0	0	0.027571
OTU181	Bacteria; Bacteroidetes; Bacteroidia; Bacteroidales; Porphyromonadaceae; Porphyromonas; unclassified	0.055142	0.055142	0	0	0.027571	0	0	0	0	0.055142	0.055142	0		OTU181	Bacteria; Firmicutes; Bacilli; Lactobacillales; Streptococcaceae; Streptococcus; unclassified	0.0270636	0.0541272	0	0.0811908	0	0	0	0	0.0541272	0	0	0.0541272		OTU0181	Bacteria; Proteobacteria; Gammaproteobacteria; Pasteurellales; Pasteurellaceae; Aggregatibacter; unclassified	0	0.0857388	0	0	0.0285796	0	0	0	0	0.0571592	0	0		OTU181	Bacteria; Bacteroidetes; Flavobacteria; Flavobacteriales; Flavobacteriaceae; Capnocytophaga; unclassified	0	0	0
OTU182	Bacteria; Firmicutes; Clostridia; Clostridiales; unclassified; unclassified; unclassified	0	0	0	0.082713	0.027571	0.055142	0	0	0.055142	0	0	0.027571		OTU182	Bacteria; Actinobacteria; Actinobacteria; Actinomycetales; Micrococcaceae; unclassified; unclassified	0	0	0	0.0541272	0.0811908	0	0.0270636	0	0	0.0270636	0.0541272	0.0270636		OTU0182	Bacteria; unclassified; unclassified; unclassified; unclassified; unclassified; unclassified	0	0.0285796	0	0.0285796	0	0.0571592	0	0	0	0.0285796	0	0.0285796		OTU182	Bacteria; Proteobacteria; Betaproteobacteria; Burkholderiales; Burkholderiaceae; Lautropia; unclassified	0	0	0
OTU183	Bacteria; Fusobacteria; Fusobacteria; Fusobacteriales; Fusobacteriaceae; Leptotrichia; unclassified	0	0.055142	0.027571	0.055142	0.027571	0	0	0	0	0.055142	0.027571	0		OTU183	Bacteria; Firmicutes; Clostridia; Clostridiales; Veillonellaceae; Selenomonas; Selenomonas sputigena	0.0270636	0.0811908	0	0.0270636	0	0	0.0270636	0.0270636	0.0811908	0	0	0		OTU0183	Bacteria; Proteobacteria; Betaproteobacteria; Neisseriales; Neisseriaceae; Simonsiella; Simonsiella muelleri	0.0571592	0.0571592	0	0	0	0	0	0	0	0.0285796	0.0285796	0		OTU183	Bacteria; Bacteroidetes; Flavobacteria; Flavobacteriales; Flavobacteriaceae; Capnocytophaga; Capnocytophaga ochracea	0	0	0.055142
OTU184	Bacteria; Fusobacteria; Fusobacteria; Fusobacteriales; Fusobacteriaceae; Fusobacterium; unclassified	0	0.055142	0	0	0	0	0.027571	0.082713	0.027571	0	0.027571	0.027571		OTU184	Bacteria; Bacteroidetes; Bacteroidia; Bacteroidales; Prevotellaceae; Prevotella; unclassified	0	0.0270636	0.0270636	0.0270636	0.0270636	0.0541272	0	0	0	0.0270636	0.0270636	0.0541272		OTU0184	Bacteria; Proteobacteria; Alphaproteobacteria; Rhodobacterales; Rhodobacteraceae; Paracoccus; Paracoccus aminovorans	0	0	0	0	0	0	0	0	0.142898	0	0	0.0285796		OTU184	Bacteria; Bacteroidetes; Bacteroidia; Bacteroidales; Prevotellaceae; Prevotella; unclassified	0	0	0
OTU185	Bacteria; Bacteroidetes; Flavobacteria; Flavobacteriales; Flavobacteriaceae; Capnocytophaga; Capnocytophaga ochracea	0	0	0.027571	0	0.027571	0	0	0.027571	0.055142	0	0.055142	0.055142		OTU185	Bacteria; Fusobacteria; Fusobacteria; Fusobacteriales; Fusobacteriaceae; Fusobacterium; unclassified	0.0270636	0.0270636	0.0541272	0	0.0541272	0.0270636	0	0.0541272	0	0	0	0.0270636		OTU0185	Bacteria; Bacteroidetes; Bacteroidia; Bacteroidales; Prevotellaceae; Prevotella; unclassified	0	0.0285796	0.0285796	0.0285796	0	0	0	0.0571592	0	0	0	0.0285796		OTU185	Bacteria; Bacteroidetes; Bacteroidia; Bacteroidales; Porphyromonadaceae; Porphyromonas; unclassified	0.027571	0	0
OTU186	Bacteria; Proteobacteria; Betaproteobacteria; Neisseriales; Neisseriaceae; Eikenella; Eikenella corrodens	0.027571	0	0.027571	0	0.027571	0	0.027571	0	0.027571	0.027571	0.055142	0.027571		OTU186	Bacteria; TM7; TM7-3; EW055; unclassified; unclassified; unclassified	0.0811908	0	0	0.0270636	0	0	0.0270636	0.0541272	0.0270636	0.0270636	0.0270636	0		OTU0186	Bacteria; Bacteroidetes; Bacteroidia; Bacteroidales; Prevotellaceae; Prevotella; Prevotella oulorum	0	0	0	0.0285796	0	0	0	0	0	0	0.0285796	0.114318		OTU186	Bacteria; Bacteroidetes; Flavobacteria; Flavobacteriales; Flavobacteriaceae; Capnocytophaga; Capnocytophaga ochracea	0	0.027571	0
OTU187	Bacteria; Bacteroidetes; Bacteroidia; Bacteroidales; Prevotellaceae; Prevotella; unclassified	0.027571	0	0	0.027571	0	0.027571	0	0	0.027571	0	0.055142	0.082713		OTU187	Bacteria; Firmicutes; Bacilli; Lactobacillales; Streptococcaceae; Streptococcus; unclassified	0.108254	0	0	0.0541272	0.0541272	0.0270636	0	0	0.0270636	0	0	0		OTU0187	Bacteria; Firmicutes; Bacilli; Lactobacillales; Streptococcaceae; Streptococcus; unclassified	0	0	0.0285796	0.0857388	0	0.0571592	0	0	0	0	0	0		OTU187	Bacteria; Bacteroidetes; Flavobacteria; Flavobacteriales; Flavobacteriaceae; Capnocytophaga; unclassified	0	0	0
OTU188	Bacteria; Bacteroidetes; Flavobacteria; Flavobacteriales; Flavobacteriaceae; Capnocytophaga; unclassified	0	0.027571	0	0	0	0.027571	0	0.082713	0.027571	0	0.055142	0.027571		OTU188	Bacteria; Firmicutes; Bacilli; Lactobacillales; Carnobacteriaceae; Granulicatella; unclassified	0.0811908	0	0	0	0.0541272	0	0.0270636	0.0541272	0	0.0270636	0	0.0270636		OTU0188	Bacteria; Proteobacteria; Gammaproteobacteria; Pasteurellales; Pasteurellaceae; Aggregatibacter; Aggregatibacter segnis	0	0	0.0571592	0.0285796	0	0.0285796	0	0	0	0	0	0.0571592		OTU188	Bacteria; Bacteroidetes; Flavobacteria; Flavobacteriales; Flavobacteriaceae; Capnocytophaga; Capnocytophaga haemolytica	0	0	0
OTU189	Bacteria; Fusobacteria; Fusobacteria; Fusobacteriales; Fusobacteriaceae; Fusobacterium; unclassified	0	0.082713	0	0	0	0.027571	0.027571	0.027571	0.055142	0	0	0		OTU189	Bacteria; Bacteroidetes; Bacteroidia; Bacteroidales; Prevotellaceae; Prevotella; unclassified	0.0270636	0.0270636	0	0	0	0	0.0541272	0	0.0270636	0.108254	0	0		OTU0189	Bacteria; Proteobacteria; Gammaproteobacteria; Pasteurellales; Pasteurellaceae; Haemophilus; unclassified	0.0285796	0.0285796	0.0285796	0.0285796	0.0285796	0.0285796	0	0	0	0	0	0		OTU189	Bacteria; Bacteroidetes; Flavobacteria; Flavobacteriales; Flavobacteriaceae; Capnocytophaga; Capnocytophaga ochracea	0	0	0
OTU190	Bacteria; Bacteroidetes; Bacteroidia; Bacteroidales; Prevotellaceae; Prevotella; unclassified	0	0	0	0	0	0.027571	0.082713	0.027571	0	0.027571	0.027571	0.027571		OTU190	Bacteria; Tenericutes; Erysipelotrichi; Erysipelotrichales; Erysipelotrichaceae; Bulleidia; Solobacterium moorei	0.0541272	0.0270636	0.0270636	0	0	0.0270636	0.0541272	0	0	0	0	0.0541272		OTU0190	Bacteria; Fusobacteria; Fusobacteria; Fusobacteriales; Fusobacteriaceae; Leptotrichia; unclassified	0	0.0571592	0	0	0.0285796	0	0	0.0285796	0.0285796	0.0285796	0	0		OTU190	Bacteria; Bacteroidetes; Bacteroidia; Bacteroidales; Prevotellaceae; Prevotella; Prevotella pallens	0.055142	0.055142	0.027571
OTU191	Bacteria; Fusobacteria; Fusobacteria; Fusobacteriales; Fusobacteriaceae; Leptotrichia; unclassified	0	0.027571	0	0.027571	0.110284	0.027571	0	0	0.027571	0	0	0		OTU191	Bacteria; Firmicutes; Clostridia; Clostridiales; Veillonellaceae; Selenomonas; unclassified	0	0	0	0.0270636	0	0	0.0270636	0.0270636	0.135318	0	0	0.0270636		OTU0191	Bacteria; Proteobacteria; Betaproteobacteria; Neisseriales; Neisseriaceae; Eikenella; Eikenella corrodens	0.0285796	0	0.0285796	0	0.0285796	0	0.0285796	0	0.0285796	0	0.0285796	0		OTU191	Bacteria; Proteobacteria; Betaproteobacteria; Burkholderiales; Comamonadaceae; unclassified; unclassified	0	0	0
OTU192	Bacteria; Firmicutes; Bacilli; Lactobacillales; Carnobacteriaceae; Granulicatella; unclassified	0.082713	0	0	0	0.027571	0	0.055142	0.055142	0	0	0	0		OTU192	Bacteria; Proteobacteria; Gammaproteobacteria; Pasteurellales; Pasteurellaceae; Haemophilus; unclassified	0.0270636	0.0270636	0.0270636	0.0541272	0.0270636	0.0541272	0	0.0270636	0	0	0	0		OTU0192	Bacteria; Firmicutes; Clostridia; Clostridiales; unclassified; unclassified; unclassified	0.0285796	0	0.0285796	0.0285796	0.0285796	0	0	0.0285796	0.0285796	0	0	0		OTU192	Bacteria; Proteobacteria; Betaproteobacteria; unclassified; unclassified; unclassified; unclassified	0	0	0
OTU193	Bacteria; Proteobacteria; Gammaproteobacteria; Pasteurellales; Pasteurellaceae; Aggregatibacter; Aggregatibacter segnis	0	0.027571	0.055142	0.055142	0	0.027571	0.027571	0.027571	0	0	0	0		OTU193	Bacteria; Proteobacteria; Betaproteobacteria; Neisseriales; Neisseriaceae; Simonsiella; Simonsiella muelleri	0.0541272	0.108254	0	0.0270636	0	0	0	0	0	0.0270636	0.0270636	0		OTU0193	Bacteria; Bacteroidetes; Flavobacteria; Flavobacteriales; Flavobacteriaceae; Capnocytophaga; Capnocytophaga haemolytica	0	0	0	0	0	0	0.0285796	0.0571592	0	0.0285796	0.0571592	0		OTU193	Bacteria; Proteobacteria; Betaproteobacteria; Neisseriales; Neisseriaceae; Neisseria; unclassified	0	0	0
OTU194	Bacteria; Bacteroidetes; Bacteroidia; Bacteroidales; Prevotellaceae; Prevotella; unclassified	0.055142	0	0.027571	0	0.027571	0	0.055142	0	0.027571	0	0.027571	0		OTU194	Bacteria; Bacteroidetes; Bacteroidia; Bacteroidales; Porphyromonadaceae; Porphyromonas; unclassified	0.0270636	0	0	0.0541272	0	0.0270636	0	0	0	0.0811908	0.0541272	0		OTU0194	Bacteria; Fusobacteria; Fusobacteria; Fusobacteriales; Fusobacteriaceae; Fusobacterium; unclassified	0	0.0571592	0.0285796	0	0	0.0285796	0	0	0	0	0.0571592	0		OTU194	Bacteria; Proteobacteria; Betaproteobacteria; Burkholderiales; Burkholderiaceae; Lautropia; unclassified	0	0	0
OTU195	Bacteria; Fusobacteria; Fusobacteria; Fusobacteriales; Fusobacteriaceae; Fusobacterium; unclassified	0	0	0	0.027571	0	0.027571	0.027571	0	0.027571	0.027571	0.027571	0.055142		OTU195	Bacteria; Bacteroidetes; Bacteroidia; Bacteroidales; Porphyromonadaceae; Porphyromonas; unclassified	0.0541272	0.0270636	0	0	0	0.0541272	0.0270636	0	0.0270636	0	0.0270636	0		OTU0195	Bacteria; Tenericutes; Mollicutes; Mycoplasmatales; Mycoplasmataceae; Mycoplasma; unclassified	0	0	0	0	0.0285796	0	0.0571592	0.0285796	0	0	0.0571592	0		OTU195	Bacteria; Proteobacteria; Gammaproteobacteria; Pasteurellales; Pasteurellaceae; Haemophilus; Haemophilus influenzae	0	0	0
OTU196	Bacteria; TM7; TM7-3; EW055; unclassified; unclassified; unclassified	0	0.027571	0	0.027571	0	0	0.110284	0	0.055142	0	0	0		OTU196	Bacteria; Firmicutes; Clostridia; Clostridiales; Lachnospiraceae; unclassified; unclassified	0.0270636	0	0	0	0	0	0.0541272	0.0270636	0.0541272	0.0270636	0	0.0270636		OTU0196	Bacteria; Bacteroidetes; Flavobacteria; Flavobacteriales; Flavobacteriaceae; Capnocytophaga; Capnocytophaga ochracea	0	0	0	0	0	0.0285796	0.0285796	0.0285796	0	0.0285796	0.0285796	0		OTU196	Bacteria; Bacteroidetes; Bacteroidia; Bacteroidales; Prevotellaceae; Prevotella; unclassified	0.027571	0	0
OTU197	Bacteria; Actinobacteria; Actinobacteria; Actinomycetales; Micrococcaceae; unclassified; unclassified	0	0	0	0.027571	0.055142	0	0.027571	0	0	0.027571	0.027571	0.055142		OTU197	Bacteria; Tenericutes; Mollicutes; Mycoplasmatales; Mycoplasmataceae; Mycoplasma; unclassified	0	0	0	0	0.0541272	0	0.0541272	0.0270636	0.0270636	0	0.0541272	0		OTU0197	Bacteria; Actinobacteria; Actinobacteria; Actinomycetales; Propionibacteriaceae; Propionibacterium; Propionibacterium acnes	0	0.0285796	0	0	0	0	0.0285796	0.0285796	0.0285796	0	0.0285796	0		OTU197	Bacteria; Bacteroidetes; Bacteroidia; Bacteroidales; Porphyromonadaceae; Porphyromonas; unclassified	0.027571	0	0
OTU198	Bacteria; Proteobacteria; Gammaproteobacteria; Pasteurellales; Pasteurellaceae; Haemophilus; Haemophilus parainfluenzae	0	0	0	0.055142	0.055142	0.055142	0	0	0.027571	0	0	0		OTU198	Bacteria; Bacteroidetes; Flavobacteria; Flavobacteriales; Flavobacteriaceae; Capnocytophaga; Capnocytophaga ochracea	0	0	0.0270636	0	0	0	0	0.0270636	0.0811908	0	0.0541272	0.0270636		OTU0198	Bacteria; Bacteroidetes; Bacteroidia; Bacteroidales; Prevotellaceae; Prevotella; unclassified	0.0285796	0	0	0.0571592	0	0	0	0	0.0285796	0	0.0285796	0		OTU198	Bacteria; Bacteroidetes; Bacteroidia; Bacteroidales; Prevotellaceae; Prevotella; unclassified	0.027571	0	0
OTU199	Bacteria; Proteobacteria; Alphaproteobacteria; Rhodobacterales; Rhodobacteraceae; Paracoccus; Paracoccus aminovorans	0	0	0	0	0	0	0	0	0.192997	0	0	0		OTU199	Bacteria; Fusobacteria; Fusobacteria; Fusobacteriales; Fusobacteriaceae; Leptotrichia; unclassified	0.0270636	0	0	0	0.0811908	0.0541272	0	0.0541272	0	0	0	0		OTU0199	Bacteria; Firmicutes; Bacilli; Bacillales; Staphylococcaceae; Staphylococcus; unclassified	0	0	0	0	0	0	0.0285796	0	0.0285796	0.0857388	0	0		OTU199	Bacteria; Bacteroidetes; Bacteroidia; Bacteroidales; Prevotellaceae; Prevotella; Prevotella nanceiensis	0.055142	0.165426	0.055142
OTU200	Bacteria; Proteobacteria; Betaproteobacteria; Neisseriales; Neisseriaceae; Eikenella; Eikenella corrodens	0.027571	0.055142	0.027571	0	0.027571	0	0.027571	0	0.027571	0	0	0		OTU200	Bacteria; Fusobacteria; Fusobacteria; Fusobacteriales; Fusobacteriaceae; Fusobacterium; unclassified	0	0.0270636	0	0	0	0.0270636	0.0270636	0.0270636	0.0811908	0.0270636	0	0		OTU0200	Bacteria; Bacteroidetes; Flavobacteria; Flavobacteriales; Flavobacteriaceae; unclassified; unclassified	0	0	0	0	0	0.0571592	0.0285796	0	0.0285796	0.0285796	0	0		OTU200	Bacteria; Bacteroidetes; Bacteroidia; Bacteroidales; Prevotellaceae; Prevotella; unclassified	0	0.027571	0
OTU201	Bacteria; Bacteroidetes; Flavobacteria; Flavobacteriales; Flavobacteriaceae; Capnocytophaga; unclassified	0	0.027571	0	0.027571	0	0	0	0.027571	0.027571	0.027571	0.027571	0.027571		OTU201	Bacteria; Bacteroidetes; Flavobacteria; Flavobacteriales; Flavobacteriaceae; unclassified; unclassified	0	0	0	0	0.0270636	0.0270636	0.0270636	0	0.0270636	0.0270636	0.0541272	0.0270636		OTU0201	Bacteria; Proteobacteria; Betaproteobacteria; Neisseriales; Neisseriaceae; Neisseria; unclassified	0.0285796	0	0	0	0	0	0	0.0571592	0.0571592	0	0	0		OTU201	Bacteria; Bacteroidetes; Flavobacteria; Flavobacteriales; Flavobacteriaceae; Capnocytophaga; unclassified	0	0.027571	0.082713
OTU202	Bacteria; Bacteroidetes; Bacteroidia; Bacteroidales; Prevotellaceae; Prevotella; unclassified	0	0.027571	0.027571	0	0.027571	0	0.027571	0	0	0.027571	0.027571	0.027571		OTU202	Bacteria; Bacteroidetes; Flavobacteria; Flavobacteriales; Flavobacteriaceae; Capnocytophaga; unclassified	0	0	0.0270636	0.0270636	0	0	0	0.0270636	0.0270636	0.0270636	0.0270636	0.0541272		OTU0202	Bacteria; Spirochaetes; Spirochaetes; Spirochaetales; Spirochaetaceae; Treponema; unclassified	0	0	0	0	0	0.0285796	0.0285796	0	0	0.0571592	0	0.0285796		OTU202	Bacteria; Bacteroidetes; Bacteroidia; Bacteroidales; Prevotellaceae; Prevotella; unclassified	0	0	0
OTU203	Bacteria; Firmicutes; Clostridia; Clostridiales; Veillonellaceae; Dialister; Dialister pneumosintes	0.027571	0.055142	0	0.027571	0	0	0	0	0.027571	0.027571	0.027571	0		OTU203	Bacteria; Bacteroidetes; Flavobacteria; Flavobacteriales; Flavobacteriaceae; Capnocytophaga; unclassified	0	0	0	0.0270636	0	0	0	0.0541272	0.0270636	0	0.0811908	0.0270636		OTU0203	Bacteria; Bacteroidetes; Bacteroidia; Bacteroidales; Prevotellaceae; Prevotella; unclassified	0	0	0	0.0285796	0	0	0	0.0857388	0	0.0285796	0	0		OTU203	Bacteria; Bacteroidetes; Bacteroidia; Bacteroidales; Prevotellaceae; Prevotella; unclassified	0	0	0.027571
OTU204	Bacteria; Proteobacteria; Epsilonproteobacteria; Campylobacterales; Campylobacteraceae; Campylobacter; Campylobacter rectus	0	0	0	0	0	0	0.055142	0	0.082713	0.027571	0	0.027571		OTU204	Bacteria; Bacteroidetes; Flavobacteria; Flavobacteriales; Flavobacteriaceae; Capnocytophaga; Capnocytophaga ochracea	0	0	0	0.0270636	0	0.0270636	0.0270636	0	0.0270636	0.0811908	0	0.0270636		OTU0204	Bacteria; Bacteroidetes; Bacteroidia; Bacteroidales; Prevotellaceae; Prevotella; unclassified	0	0.0285796	0.0285796	0.0285796	0	0	0.0285796	0	0	0	0	0.0285796		OTU204	Bacteria; Bacteroidetes; Bacteroidia; Bacteroidales; Porphyromonadaceae; Tannerella; unclassified	0	0	0.027571
OTU205	Bacteria; Firmicutes; Clostridia; Clostridiales; Veillonellaceae; Selenomonas; unclassified	0	0	0	0	0.027571	0	0	0.055142	0.027571	0.027571	0.055142	0		OTU205	Bacteria; Firmicutes; Bacilli; Gemellales; Gemellaceae; Gemella; unclassified	0.0270636	0.0541272	0.0270636	0	0.0270636	0.0270636	0	0	0	0.0270636	0	0.0270636		OTU0205	Bacteria; Bacteroidetes; Bacteroidia; Bacteroidales; Prevotellaceae; Prevotella; Prevotella baroniae	0	0.0571592	0	0	0.0285796	0	0	0	0.0285796	0.0285796	0	0		OTU205	Bacteria; Bacteroidetes; Bacteroidia; Bacteroidales; Prevotellaceae; Prevotella; unclassified	0	0	0.082713
OTU206	Bacteria; Fusobacteria; Fusobacteria; Fusobacteriales; Fusobacteriaceae; Fusobacterium; unclassified	0	0	0.027571	0	0	0	0.055142	0.027571	0.055142	0.027571	0	0		OTU206	Bacteria; Fusobacteria; Fusobacteria; Fusobacteriales; Fusobacteriaceae; Fusobacterium; unclassified	0	0.0541272	0	0	0	0.0541272	0.0270636	0	0	0.0270636	0	0.0270636		OTU0206	Bacteria; Proteobacteria; Betaproteobacteria; Neisseriales; Neisseriaceae; Neisseria; unclassified	0	0	0.0285796	0.0571592	0.0285796	0	0	0	0	0.0285796	0	0		OTU206	Bacteria; Bacteroidetes; Flavobacteria; Flavobacteriales; Flavobacteriaceae; unclassified; unclassified	0.192997	0.165426	0.165426
OTU207	Bacteria; Spirochaetes; Spirochaetes; Spirochaetales; Spirochaetaceae; Treponema; Treponema socranskii	0	0	0	0	0	0	0	0	0.055142	0.137855	0	0		OTU207	Bacteria; Fusobacteria; Fusobacteria; Fusobacteriales; Fusobacteriaceae; Leptotrichia; unclassified	0.0270636	0	0.0270636	0.0541272	0.0270636	0	0	0	0	0	0.0541272	0		OTU0207	Bacteria; Firmicutes; Bacilli; Lactobacillales; Streptococcaceae; Streptococcus; unclassified	0	0.0571592	0	0	0.0285796	0.0285796	0	0.0285796	0	0	0	0		OTU207	Bacteria; Bacteroidetes; Bacteroidia; Bacteroidales; Porphyromonadaceae; Porphyromonas; unclassified	0	0.110284	0.055142
OTU208	Bacteria; Bacteroidetes; Flavobacteria; Flavobacteriales; Flavobacteriaceae; unclassified; unclassified	0	0	0	0	0	0.027571	0.027571	0	0	0.027571	0.027571	0.082713		OTU208	Bacteria; Proteobacteria; Betaproteobacteria; Burkholderiales; Comamonadaceae; unclassified; unclassified	0	0	0	0	0	0	0	0	0.0270636	0.135318	0	0.0270636		OTU0208	Bacteria; Proteobacteria; Betaproteobacteria; Neisseriales; Neisseriaceae; Neisseria; unclassified	0.0285796	0.0285796	0.0285796	0	0	0.0285796	0	0	0	0	0	0.0285796		OTU208	Bacteria; Bacteroidetes; Bacteroidia; Bacteroidales; Prevotellaceae; Prevotella; unclassified	0	0.110284	0.027571
OTU209	Bacteria; Proteobacteria; Gammaproteobacteria; Pasteurellales; Pasteurellaceae; unclassified; unclassified	0.027571	0.055142	0	0.055142	0.027571	0	0.027571	0	0	0	0	0		OTU209	Bacteria; Firmicutes; Clostridia; Clostridiales; Veillonellaceae; Dialister; Dialister pneumosintes	0.0270636	0.0541272	0	0.0270636	0.0270636	0	0	0	0.0270636	0	0.0270636	0		OTU0209	Bacteria; Proteobacteria; Gammaproteobacteria; Pasteurellales; Pasteurellaceae; unclassified; unclassified	0.0285796	0.0285796	0	0	0.0285796	0	0	0	0	0	0.0571592	0		OTU209	Bacteria; Bacteroidetes; Bacteroidia; Bacteroidales; Prevotellaceae; Prevotella; unclassified	0	0	0
OTU210	Bacteria; Bacteroidetes; Flavobacteria; Flavobacteriales; Flavobacteriaceae; Capnocytophaga; Capnocytophaga ochracea	0	0	0	0	0.027571	0.027571	0.055142	0	0	0.027571	0.055142	0		OTU210	Bacteria; Spirochaetes; Spirochaetes; Spirochaetales; Spirochaetaceae; Treponema; unclassified	0	0	0	0	0	0	0.0811908	0	0.0541272	0	0.0270636	0.0270636		OTU0210	Bacteria; Bacteroidetes; Bacteroidia; Bacteroidales; Porphyromonadaceae; Porphyromonas; unclassified	0	0	0	0	0	0.0285796	0	0	0	0	0.0285796	0.0571592		OTU210	Bacteria; Bacteroidetes; Flavobacteria; Flavobacteriales; Flavobacteriaceae; unclassified; unclassified	0	0	0
OTU211	Bacteria; Spirochaetes; Spirochaetes; Spirochaetales; Spirochaetaceae; Treponema; unclassified	0	0	0	0	0	0	0.055142	0	0	0.082713	0.027571	0.027571		OTU211	Bacteria; Proteobacteria; Betaproteobacteria; unclassified; unclassified; unclassified; unclassified	0	0.0811908	0	0	0	0	0	0	0.0270636	0.0270636	0.0541272	0		OTU0211	Bacteria; Firmicutes; Clostridia; Clostridiales; Veillonellaceae; Selenomonas; unclassified	0	0	0	0	0.0285796	0	0	0	0	0	0.0571592	0.0285796		OTU211	Bacteria; Proteobacteria; Betaproteobacteria; Burkholderiales; Burkholderiaceae; Lautropia; unclassified	0	0	0
OTU212	Bacteria; Bacteroidetes; Flavobacteria; Flavobacteriales; Flavobacteriaceae; Capnocytophaga; Capnocytophaga haemolytica	0	0	0	0	0	0	0.027571	0.082713	0.027571	0.027571	0.027571	0		OTU212	Bacteria; Proteobacteria; Betaproteobacteria; unclassified; unclassified; unclassified; unclassified	0	0.0270636	0.0270636	0	0	0	0	0.0811908	0.0270636	0.0270636	0	0		OTU0212	Bacteria; Firmicutes; Bacilli; Lactobacillales; Streptococcaceae; Streptococcus; unclassified	0	0.0285796	0.0285796	0.0571592	0	0	0	0	0	0	0	0		OTU212	Bacteria; Bacteroidetes; Flavobacteria; Flavobacteriales; Flavobacteriaceae; Capnocytophaga; unclassified	0	0	0
OTU213	Bacteria; Proteobacteria; Betaproteobacteria; Neisseriales; Neisseriaceae; Neisseria; unclassified	0	0.082713	0	0	0.055142	0	0	0.027571	0	0.027571	0	0		OTU213	Bacteria; Proteobacteria; Gammaproteobacteria; Pasteurellales; Pasteurellaceae; unclassified; unclassified	0.0270636	0	0	0.0270636	0.0270636	0	0.0270636	0	0	0	0.0811908	0		OTU0213	Bacteria; Bacteroidetes; Flavobacteria; Flavobacteriales; Flavobacteriaceae; Capnocytophaga; unclassified	0	0	0	0.0285796	0	0	0	0.0285796	0	0	0.0285796	0.0285796		OTU213	Bacteria; Actinobacteria; Actinobacteria; Actinomycetales; Actinomycetaceae; Actinomyces; Actinomyces odontolyticus	0	0	0
OTU214	Bacteria; Bacteroidetes; Bacteroidia; Bacteroidales; Prevotellaceae; Prevotella; Prevotella oulorum	0	0	0	0.027571	0	0	0	0.027571	0.082713	0	0.027571	0.027571		OTU214	Bacteria; Proteobacteria; Gammaproteobacteria; Pasteurellales; Pasteurellaceae; Aggregatibacter; Aggregatibacter segnis	0	0.0270636	0.0541272	0	0.0270636	0.0270636	0.0270636	0	0	0	0	0.0270636		OTU0214	Bacteria; Spirochaetes; Spirochaetes; Spirochaetales; Spirochaetaceae; Treponema; Treponema lecithinolyticum	0	0	0.0285796	0	0	0	0	0	0.0571592	0	0	0.0285796		OTU214	Bacteria; Bacteroidetes; unclassified; unclassified; unclassified; unclassified; unclassified	0	0	0
OTU215	Bacteria; unclassified; unclassified; unclassified; unclassified; unclassified; unclassified	0.027571	0	0	0.027571	0.027571	0.027571	0	0	0.055142	0.027571	0	0		OTU215	Bacteria; Fusobacteria; Fusobacteria; Fusobacteriales; Fusobacteriaceae; Leptotrichia; unclassified	0	0.0270636	0	0.0270636	0.0811908	0	0	0.0270636	0	0.0270636	0	0		OTU0215	Bacteria; Firmicutes; Clostridia; Clostridiales; Peptococcaceae; Peptococcus; unclassified	0.0285796	0.0285796	0	0	0.0285796	0.0285796	0	0	0	0	0	0		OTU215	Bacteria; Bacteroidetes; Bacteroidia; Bacteroidales; Prevotellaceae; Prevotella; unclassified	0	0	0
OTU216	Bacteria; Proteobacteria; Betaproteobacteria; unclassified; unclassified; unclassified; unclassified	0	0	0	0	0.027571	0.027571	0.027571	0.082713	0.027571	0	0	0		OTU216	Bacteria; Bacteroidetes; Flavobacteria; Flavobacteriales; Flavobacteriaceae; Capnocytophaga; Capnocytophaga ochracea	0	0	0	0	0	0.0541272	0.0541272	0.0270636	0	0.0541272	0	0		OTU0216	Bacteria; Fusobacteria; Fusobacteria; Fusobacteriales; Fusobacteriaceae; Leptotrichia; unclassified	0	0	0.0285796	0	0	0.0571592	0.0285796	0	0	0	0	0		OTU216	Bacteria; Bacteroidetes; Bacteroidia; Bacteroidales; Prevotellaceae; Prevotella; unclassified	0	0	0
OTU217	Bacteria; Proteobacteria; Betaproteobacteria; Neisseriales; Neisseriaceae; Neisseria; unclassified	0	0	0.027571	0	0.027571	0.027571	0.055142	0	0.027571	0	0	0		OTU217	Bacteria; Fusobacteria; Fusobacteria; Fusobacteriales; Fusobacteriaceae; Leptotrichia; unclassified	0	0.0541272	0.0270636	0.0541272	0.0270636	0	0	0	0	0.0270636	0	0		OTU0217	Bacteria; TM7; TM7-3; CW040; F16; unclassified; unclassified	0	0	0	0	0	0	0.0285796	0.0285796	0.0285796	0.0285796	0	0		OTU217	Bacteria; Bacteroidetes; Flavobacteria; Flavobacteriales; Flavobacteriaceae; Capnocytophaga; unclassified	0	0	0
OTU218	Bacteria; Proteobacteria; Betaproteobacteria; Burkholderiales; Comamonadaceae; unclassified; unclassified	0	0	0	0	0	0	0	0	0.027571	0.137855	0	0		OTU218	Bacteria; Firmicutes; Bacilli; Lactobacillales; Streptococcaceae; Streptococcus; Streptococcus anginosus	0.0270636	0	0.0541272	0.0270636	0	0	0.0270636	0	0	0	0	0.0270636		OTU0218	Bacteria; Spirochaetes; Spirochaetes; Spirochaetales; Spirochaetaceae; Treponema; Treponema socranskii	0.0285796	0	0.0285796	0	0	0	0	0.0285796	0	0	0.0285796	0		OTU218	Bacteria; Bacteroidetes; Bacteroidia; Bacteroidales; Prevotellaceae; Prevotella; unclassified	0	0	0.027571
OTU219	Bacteria; Bacteroidetes; Bacteroidia; Bacteroidales; Prevotellaceae; Prevotella; unclassified	0	0	0.027571	0.027571	0	0	0	0.055142	0.027571	0.027571	0	0		OTU219	Bacteria; Bacteroidetes; Bacteroidia; Bacteroidales; Porphyromonadaceae; Porphyromonas; unclassified	0.0270636	0	0	0	0	0	0	0.0270636	0	0	0	0.108254		OTU0219	Bacteria; Bacteroidetes; Flavobacteria; Flavobacteriales; Flavobacteriaceae; Capnocytophaga; unclassified	0	0	0.0285796	0	0	0.0285796	0	0	0	0	0	0.0571592		OTU219	Bacteria; Bacteroidetes; Bacteroidia; Bacteroidales; Prevotellaceae; Prevotella; unclassified	0	0	0.027571
OTU220	Bacteria; Bacteroidetes; Flavobacteria; Flavobacteriales; Flavobacteriaceae; Capnocytophaga; unclassified	0	0.027571	0	0	0	0.027571	0.027571	0	0	0.055142	0	0.027571		OTU220	Bacteria; Proteobacteria; Betaproteobacteria; Neisseriales; Neisseriaceae; Neisseria; unclassified	0	0	0	0.0270636	0	0	0	0.0811908	0.0270636	0.0270636	0	0		OTU0220	Bacteria; Bacteroidetes; Bacteroidia; Bacteroidales; Prevotellaceae; Prevotella; Prevotella oris	0	0	0	0	0	0	0	0.0857388	0	0	0.0285796	0		OTU220	Bacteria; Bacteroidetes; unclassified; unclassified; unclassified; unclassified; unclassified	0	0	0
OTU221	Bacteria; Firmicutes; Bacilli; Bacillales; Staphylococcaceae; Staphylococcus; unclassified	0	0	0	0	0	0	0.027571	0	0.055142	0.082713	0	0		OTU221	Bacteria; Proteobacteria; Betaproteobacteria; Neisseriales; Neisseriaceae; Neisseria; unclassified	0	0.0270636	0	0.0270636	0.0270636	0	0.0270636	0	0.0270636	0	0	0.0270636		OTU0221	Bacteria; Bacteroidetes; unclassified; unclassified; unclassified; unclassified; unclassified	0	0	0	0	0	0	0	0	0.0857388	0.0285796	0	0		OTU221	Bacteria; Proteobacteria; Betaproteobacteria; Neisseriales; Neisseriaceae; Neisseria; unclassified	0	0	0
OTU222	Bacteria; Firmicutes; Clostridia; Clostridiales; Veillonellaceae; Selenomonas; unclassified	0	0.110284	0	0	0	0	0	0.027571	0	0	0.027571	0		OTU222	Bacteria; Proteobacteria; Alphaproteobacteria; Rhodobacterales; Rhodobacteraceae; Paracoccus; Paracoccus aminovorans	0	0	0	0	0	0	0	0	0.135318	0	0	0.0270636		OTU0222	Bacteria; Spirochaetes; Spirochaetes; Spirochaetales; Spirochaetaceae; Treponema; Treponema lecithinolyticum	0	0	0	0.0285796	0.0285796	0	0.0285796	0	0	0.0285796	0	0		OTU222	Bacteria; unclassified; unclassified; unclassified; unclassified; unclassified; unclassified	0	0	0
OTU223	Bacteria; Firmicutes; Clostridia; Clostridiales; unclassified; unclassified; unclassified	0.027571	0	0.027571	0.027571	0.027571	0	0	0.027571	0.027571	0	0	0		OTU223	Bacteria; Proteobacteria; Betaproteobacteria; Neisseriales; Neisseriaceae; Neisseria; unclassified	0	0.0270636	0	0.0541272	0	0	0	0	0	0.0811908	0	0		OTU0223	Bacteria; Firmicutes; Bacilli; Lactobacillales; Streptococcaceae; Lactococcus; unclassified	0	0	0.0285796	0	0.0571592	0	0	0	0	0	0	0.0285796		OTU223	Bacteria; Proteobacteria; Betaproteobacteria; Neisseriales; Neisseriaceae; Neisseria; Neisseria subflava	0	0	0
OTU224	Bacteria; Proteobacteria; Betaproteobacteria; Neisseriales; Neisseriaceae; Neisseria; Neisseria subflava	0.027571	0.055142	0	0	0.027571	0.027571	0	0	0	0	0	0.027571		OTU224	Bacteria; Proteobacteria; Betaproteobacteria; Neisseriales; Neisseriaceae; Eikenella; Eikenella corrodens	0.0270636	0.0270636	0.0270636	0	0.0270636	0	0	0	0.0270636	0	0.0270636	0		OTU0224	Bacteria; Firmicutes; Clostridia; Clostridiales; Veillonellaceae; Veillonella; unclassified	0	0	0	0	0	0.0285796	0	0	0.0285796	0.0285796	0	0.0285796		OTU224	Bacteria; Proteobacteria; Betaproteobacteria; Neisseriales; Neisseriaceae; Neisseria; Neisseria subflava	0	0	0
OTU225	Bacteria; Firmicutes; Clostridia; Clostridiales; Veillonellaceae; Selenomonas; unclassified	0.027571	0.027571	0	0	0	0	0.027571	0.027571	0	0	0	0.055142		OTU225	Bacteria; Firmicutes; Bacilli; Lactobacillales; Streptococcaceae; Streptococcus; unclassified	0	0.0270636	0.0270636	0.0270636	0.0270636	0.0270636	0	0	0	0.0270636	0	0		OTU0225	Bacteria; Fusobacteria; Fusobacteria; Fusobacteriales; Fusobacteriaceae; Fusobacterium; unclassified	0	0	0	0	0	0.0571592	0.0285796	0	0	0	0	0.0285796		OTU225	Bacteria; Proteobacteria; Betaproteobacteria; Neisseriales; Neisseriaceae; Neisseria; Neisseria subflava	0	0	0
OTU226	Bacteria; Firmicutes; Clostridia; Clostridiales; Eubacteriaceae; Eubacterium; Eubacterium yuri	0	0	0	0	0	0	0.027571	0	0.027571	0.027571	0.055142	0.027571		OTU226	Bacteria; Bacteroidetes; Bacteroidia; Bacteroidales; Prevotellaceae; Prevotella; unclassified	0	0.0541272	0.0270636	0.0270636	0	0	0.0270636	0	0	0	0.0270636	0		OTU0226	Bacteria; Bacteroidetes; Bacteroidia; Bacteroidales; Prevotellaceae; Prevotella; unclassified	0	0	0.0285796	0	0	0.0571592	0	0	0.0285796	0	0	0		OTU226	Bacteria; Proteobacteria; Gammaproteobacteria; Pseudomonadales; Moraxellaceae; unclassified; unclassified	0	0	0
OTU227	Bacteria; Fusobacteria; Fusobacteria; Fusobacteriales; Fusobacteriaceae; Leptotrichia; unclassified	0.027571	0	0	0	0.027571	0.027571	0	0.055142	0	0	0	0		OTU227	Bacteria; Bacteroidetes; Bacteroidia; Bacteroidales; Prevotellaceae; Prevotella; unclassified	0	0	0	0	0	0.0270636	0.0270636	0.0270636	0	0.0541272	0	0.0270636		OTU0227	Bacteria; Fusobacteria; Fusobacteria; Fusobacteriales; Fusobacteriaceae; Leptotrichia; unclassified	0	0	0.0285796	0	0.0285796	0.0285796	0.0285796	0	0	0	0	0		OTU227	Bacteria; Proteobacteria; Betaproteobacteria; Burkholderiales; Burkholderiaceae; Lautropia; unclassified	0	0	0
OTU228	Bacteria; TM7; TM7-3; EW055; unclassified; unclassified; unclassified	0	0	0.027571	0.027571	0	0	0	0	0	0	0.027571	0.055142		OTU228	Bacteria; Firmicutes; Clostridia; Clostridiales; unclassified; unclassified; unclassified	0.0270636	0	0	0	0.0270636	0.0541272	0	0	0.0541272	0	0	0		OTU0228	Bacteria; Firmicutes; Bacilli; Lactobacillales; Carnobacteriaceae; Granulicatella; Granulicatella elegans	0	0	0.0285796	0	0.0285796	0.0285796	0	0	0	0	0	0		OTU228	Bacteria; Proteobacteria; Betaproteobacteria; Neisseriales; Neisseriaceae; Neisseria; unclassified	0	0	0
OTU229	Bacteria; Fusobacteria; Fusobacteria; Fusobacteriales; Fusobacteriaceae; Leptotrichia; unclassified	0	0	0.027571	0	0.027571	0.027571	0	0	0	0.027571	0.027571	0		OTU229	Bacteria; Proteobacteria; Betaproteobacteria; Neisseriales; Neisseriaceae; Neisseria; unclassified	0	0.0270636	0	0.0270636	0.0270636	0.0270636	0	0	0.0270636	0.0270636	0	0		OTU0229	Bacteria; Proteobacteria; Betaproteobacteria; Neisseriales; Neisseriaceae; Neisseria; unclassified	0	0.0285796	0.0571592	0	0	0	0	0	0	0	0	0		OTU229	Bacteria; Proteobacteria; Gammaproteobacteria; Pasteurellales; Pasteurellaceae; Haemophilus; Haemophilus parainfluenzae	0	0	0
OTU230	Bacteria; Fusobacteria; Fusobacteria; Fusobacteriales; Fusobacteriaceae; Fusobacterium; unclassified	0	0.027571	0.027571	0	0	0.027571	0	0	0	0	0.055142	0		OTU230	Bacteria; Firmicutes; Bacilli; Bacillales; Staphylococcaceae; Staphylococcus; unclassified	0	0.0270636	0	0	0	0	0.0270636	0	0.0270636	0.0541272	0	0.0270636		OTU0230	Bacteria; Firmicutes; Clostridia; Clostridiales; Lachnospiraceae; Clostridium; unclassified	0	0	0	0	0	0	0.0285796	0	0.0285796	0	0	0.0285796		OTU230	Bacteria; Actinobacteria; Actinobacteria; Actinomycetales; Corynebacteriaceae; Corynebacterium; Corynebacterium durum	0.027571	0.055142	0.027571
OTU231	Bacteria; Fusobacteria; Fusobacteria; Fusobacteriales; Fusobacteriaceae; Leptotrichia; unclassified	0	0.027571	0.055142	0	0.027571	0	0	0	0	0	0	0.027571		OTU231	Bacteria; Bacteroidetes; Bacteroidia; Bacteroidales; Prevotellaceae; Prevotella; unclassified	0	0.0270636	0	0.0270636	0	0	0	0.0541272	0	0.0270636	0	0		OTU0231	Bacteria; Tenericutes; Erysipelotrichi; Erysipelotrichales; Erysipelotrichaceae; Bulleidia; Bulleidia extructa	0	0	0	0	0	0	0.0285796	0	0.0285796	0.0285796	0	0		OTU231	Bacteria; Proteobacteria; Betaproteobacteria; Neisseriales; Neisseriaceae; Neisseria; Neisseria subflava	0	0	0
OTU232	Bacteria; Actinobacteria; Actinobacteria; Actinomycetales; Propionibacteriaceae; Propionibacterium; Propionibacterium acnes	0	0	0	0	0	0	0.055142	0.027571	0.027571	0	0.027571	0		OTU232	Bacteria; Bacteroidetes; Bacteroidia; Bacteroidales; Prevotellaceae; Prevotella; unclassified	0	0	0.0270636	0	0	0	0	0.0541272	0	0.0270636	0	0.0270636		OTU0232	Bacteria; Spirochaetes; Spirochaetes; Spirochaetales; Spirochaetaceae; Treponema; Treponema amylovorum	0	0	0	0	0	0	0.0571592	0.0285796	0	0	0	0		OTU232	Bacteria; Proteobacteria; Betaproteobacteria; Burkholderiales; Burkholderiaceae; unclassified; unclassified	0	0	0
OTU233	Bacteria; Spirochaetes; Spirochaetes; Spirochaetales; Spirochaetaceae; Treponema; Treponema amylovorum	0	0	0	0.027571	0	0	0.055142	0.027571	0	0.027571	0	0		OTU233	Bacteria; Firmicutes; Bacilli; Lactobacillales; Streptococcaceae; Streptococcus; unclassified	0	0.0811908	0	0.0270636	0	0.0270636	0	0	0	0	0	0		OTU0233	Bacteria; Firmicutes; Clostridia; Clostridiales; Veillonellaceae; Selenomonas; unclassified	0	0	0	0	0	0	0.0285796	0	0.0285796	0	0	0.0285796		OTU233	Bacteria; Actinobacteria; Actinobacteria; Actinomycetales; Micrococcaceae; Rothia; unclassified	0	0	0
OTU234	Bacteria; Proteobacteria; Epsilonproteobacteria; Campylobacterales; Campylobacteraceae; Campylobacter; Campylobacter rectus	0	0	0	0	0	0	0.027571	0	0.055142	0.027571	0.027571	0		OTU234	Bacteria; Bacteroidetes; Flavobacteria; Flavobacteriales; Flavobacteriaceae; Capnocytophaga; Capnocytophaga haemolytica	0	0	0	0	0	0	0	0.108254	0	0.0270636	0	0		OTU0234	Bacteria; Spirochaetes; Spirochaetes; Spirochaetales; Spirochaetaceae; Treponema; unclassified	0	0.0285796	0	0	0.0285796	0	0	0	0	0	0	0.0285796		OTU234	Bacteria; Actinobacteria; Actinobacteria; Actinomycetales; Corynebacteriaceae; Corynebacterium; Corynebacterium durum	0	0	0
OTU235	Bacteria; Firmicutes; Clostridia; Clostridiales; Veillonellaceae; Selenomonas; unclassified	0	0	0	0	0.027571	0	0.027571	0	0	0	0.055142	0.027571		OTU235	Bacteria; Spirochaetes; Spirochaetes; Spirochaetales; Spirochaetaceae; Treponema; Treponema lecithinolyticum	0	0	0.0270636	0.0270636	0	0	0	0	0.0541272	0	0	0.0270636		OTU0235	Bacteria; Bacteroidetes; Bacteroidia; Bacteroidales; Prevotellaceae; Prevotella; unclassified	0	0.0571592	0	0	0	0	0	0	0.0285796	0	0	0		OTU235	Bacteria; Actinobacteria; Actinobacteria; Actinomycetales; Micrococcaceae; Rothia; unclassified	3.22581	3.47395	3.4188
OTU236	Bacteria; Proteobacteria; Betaproteobacteria; Neisseriales; Neisseriaceae; unclassified; unclassified	0.027571	0	0	0	0	0	0	0.027571	0.027571	0.027571	0.027571	0		OTU236	Bacteria; Proteobacteria; Gammaproteobacteria; Pasteurellales; Pasteurellaceae; Aggregatibacter; Aggregatibacter segnis	0	0	0.0270636	0	0.0541272	0.0270636	0	0	0	0	0	0.0270636		OTU0236	Bacteria; Proteobacteria; Gammaproteobacteria; Pasteurellales; Pasteurellaceae; Haemophilus; Haemophilus parainfluenzae	0	0.0571592	0	0	0	0	0	0	0.0285796	0	0	0		OTU236	Bacteria; Actinobacteria; Actinobacteria; Actinomycetales; Micrococcaceae; unclassified; unclassified	0	0	0
OTU237	Bacteria; Firmicutes; Clostridia; Clostridiales; Veillonellaceae; Selenomonas; unclassified	0.055142	0	0	0	0	0	0	0	0	0	0.082713	0		OTU237	Bacteria; Firmicutes; Clostridia; Clostridiales; unclassified; unclassified; unclassified	0.0270636	0	0.0270636	0	0.0270636	0.0270636	0	0.0270636	0	0	0	0		OTU0237	Bacteria; Bacteroidetes; Bacteroidia; Bacteroidales; Prevotellaceae; Prevotella; unclassified	0	0	0	0	0	0	0	0	0	0.0571592	0.0285796	0		OTU237	Bacteria; Actinobacteria; Actinobacteria; Actinomycetales; Micrococcaceae; Rothia; Rothia mucilaginosa	0.027571	0.110284	0.055142
OTU238	Bacteria; Bacteroidetes; Bacteroidia; Bacteroidales; Prevotellaceae; Prevotella; unclassified	0	0	0.082713	0.027571	0	0.027571	0	0	0	0	0	0		OTU238	Bacteria; TM7; TM7-3; EW055; unclassified; unclassified; unclassified	0	0.0270636	0	0	0	0	0.0811908	0	0.0270636	0	0	0		OTU0238	Bacteria; Fusobacteria; Fusobacteria; Fusobacteriales; Fusobacteriaceae; Leptotrichia; unclassified	0.0285796	0	0	0	0	0	0	0.0571592	0	0	0	0		OTU238	Bacteria; Actinobacteria; Actinobacteria; Actinomycetales; Micrococcaceae; Rothia; unclassified	0	0	0
OTU239	Bacteria; Bacteroidetes; Flavobacteria; Flavobacteriales; Flavobacteriaceae; Capnocytophaga; unclassified	0	0.082713	0	0	0	0.027571	0	0	0	0	0	0.027571		OTU239	Bacteria; Tenericutes; Mollicutes; RF39; unclassified; unclassified; unclassified	0	0	0	0.0270636	0	0	0	0	0	0	0.0541272	0.0541272		OTU0239	Bacteria; Proteobacteria; Betaproteobacteria; Neisseriales; Neisseriaceae; Neisseria; unclassified	0	0.0285796	0	0.0285796	0	0	0	0	0	0	0.0285796	0		OTU239	Bacteria; Fusobacteria; Fusobacteria; Fusobacteriales; Fusobacteriaceae; Fusobacterium; unclassified	0	0	0
OTU240	Bacteria; Proteobacteria; Betaproteobacteria; unclassified; unclassified; unclassified; unclassified	0	0.027571	0	0	0	0	0	0.027571	0.055142	0.027571	0	0		OTU240	Bacteria; Spirochaetes; Spirochaetes; Spirochaetales; Spirochaetaceae; Treponema; unclassified	0	0	0	0	0	0	0.0270636	0	0.0811908	0	0	0.0270636		OTU0240	Bacteria; Firmicutes; Bacilli; Lactobacillales; Carnobacteriaceae; Granulicatella; unclassified	0	0	0	0	0	0.0285796	0	0	0	0.0571592	0	0		OTU240	Bacteria; Fusobacteria; Fusobacteria; Fusobacteriales; Fusobacteriaceae; Streptobacillus; unclassified	0	0.027571	0.055142
OTU241	Bacteria; Proteobacteria; Gammaproteobacteria; Pasteurellales; Pasteurellaceae; Haemophilus; unclassified	0.027571	0	0.027571	0.027571	0.027571	0	0	0.027571	0	0	0	0		OTU241	Bacteria; Firmicutes; Clostridia; Clostridiales; Veillonellaceae; Selenomonas; Selenomonas sputigena	0	0.0541272	0	0	0	0	0	0	0	0.0811908	0	0		OTU0241	Bacteria; Bacteroidetes; Flavobacteria; Flavobacteriales; Flavobacteriaceae; Capnocytophaga; unclassified	0	0	0	0	0	0.0285796	0	0	0	0.0285796	0	0.0285796		OTU241	Bacteria; Firmicutes; Clostridia; Clostridiales; Catabacteriaceae; unclassified; unclassified	0.027571	0.027571	0
OTU242	Bacteria; Fusobacteria; Fusobacteria; Fusobacteriales; Fusobacteriaceae; Leptotrichia; unclassified	0	0	0.027571	0	0	0.055142	0.027571	0	0	0.027571	0	0		OTU242	Bacteria; Actinobacteria; Actinobacteria; Actinomycetales; Propionibacteriaceae; Propionibacterium; Propionibacterium acnes	0	0.0270636	0	0	0	0	0.0541272	0.0270636	0.0270636	0	0	0		OTU0242	Bacteria; Firmicutes; Clostridia; Clostridiales; Peptococcaceae; Peptococcus; unclassified	0	0.0285796	0	0	0	0	0	0	0.0285796	0.0285796	0	0		OTU242	Bacteria; Actinobacteria; Actinobacteria; Coriobacteriales; Coriobacteriaceae; Atopobium; Atopobium rimae	0	0	0
OTU243	Bacteria; Bacteroidetes; Bacteroidia; Bacteroidales; Porphyromonadaceae; Porphyromonas; unclassified	0.027571	0	0	0	0	0.027571	0.027571	0	0.027571	0	0	0.027571		OTU243	Bacteria; Proteobacteria; Betaproteobacteria; Neisseriales; Neisseriaceae; Simonsiella; unclassified	0	0	0	0	0	0	0	0.0270636	0.0270636	0.0270636	0.0270636	0.0270636		OTU0243	Bacteria; Bacteroidetes; Flavobacteria; Flavobacteriales; Flavobacteriaceae; Capnocytophaga; unclassified	0	0	0	0	0	0	0	0	0.0285796	0	0.0285796	0.0285796		OTU243	Bacteria; Fusobacteria; Fusobacteria; Fusobacteriales; Fusobacteriaceae; Fusobacterium; unclassified	1.79211	2.86738	2.20568
OTU244	Bacteria; Proteobacteria; Betaproteobacteria; Neisseriales; Neisseriaceae; Neisseria; unclassified	0	0.027571	0	0.027571	0	0	0	0	0.027571	0.027571	0	0		OTU244	Bacteria; Proteobacteria; Gammaproteobacteria; Pasteurellales; Pasteurellaceae; Aggregatibacter; unclassified	0	0.0541272	0	0	0.0270636	0	0	0	0	0.0541272	0	0		OTU0244	Bacteria; Firmicutes; Bacilli; Lactobacillales; Streptococcaceae; Streptococcus; unclassified	0	0	0	0.0571592	0	0	0	0	0	0.0285796	0	0		OTU244	Bacteria; Actinobacteria; Actinobacteria; Coriobacteriales; Coriobacteriaceae; Atopobium; unclassified	0	0.027571	0
OTU245	Bacteria; Bacteroidetes; Bacteroidia; Bacteroidales; Prevotellaceae; Prevotella; unclassified	0	0.027571	0	0	0	0.027571	0	0	0	0	0	0.055142		OTU245	Bacteria; Bacteroidetes; Bacteroidia; Bacteroidales; Prevotellaceae; Prevotella; unclassified	0	0	0.0270636	0	0	0.0541272	0	0	0.0541272	0	0	0		OTU0245	Bacteria; Proteobacteria; Betaproteobacteria; Neisseriales; Neisseriaceae; Neisseria; unclassified	0	0	0	0	0	0.0285796	0	0	0	0.0285796	0	0.0285796		OTU245	Bacteria; unclassified; unclassified; unclassified; unclassified; unclassified; unclassified	0	0.055142	0.055142
OTU246	Bacteria; Spirochaetes; Spirochaetes; Spirochaetales; Spirochaetaceae; Treponema; unclassified	0	0	0	0	0.027571	0	0	0	0.055142	0	0	0.027571		OTU246	Bacteria; Proteobacteria; Betaproteobacteria; Burkholderiales; Burkholderiaceae; Lautropia; unclassified	0.0270636	0	0	0.0270636	0	0.0270636	0	0.0270636	0	0	0.0270636	0		OTU0246	Bacteria; Proteobacteria; Betaproteobacteria; Neisseriales; Neisseriaceae; Neisseria; unclassified	0	0	0	0	0	0.0571592	0.0285796	0	0	0	0	0		OTU246	Bacteria; Fusobacteria; Fusobacteria; Fusobacteriales; Fusobacteriaceae; Fusobacterium; unclassified	0.634133	0.744417	0.771988
OTU247	Bacteria; Spirochaetes; Spirochaetes; Spirochaetales; Spirochaetaceae; Treponema; Treponema socranskii	0	0.027571	0	0	0	0.055142	0	0	0	0	0	0.027571		OTU247	Bacteria; Bacteroidetes; Bacteroidia; Bacteroidales; Prevotellaceae; Prevotella; unclassified	0	0.0541272	0	0	0.0270636	0	0.0270636	0	0	0.0270636	0	0		OTU0247	Bacteria; Proteobacteria; Betaproteobacteria; Burkholderiales; Burkholderiaceae; Lautropia; unclassified	0	0	0	0	0	0.0285796	0	0	0	0	0	0.0571592		OTU247	Bacteria; Fusobacteria; Fusobacteria; Fusobacteriales; Fusobacteriaceae; Fusobacterium; Fusobacterium necrophorum	0.082713	0.055142	0.055142
OTU248	Bacteria; Proteobacteria; Gammaproteobacteria; Pseudomonadales; Pseudomonadaceae; Pseudomonas; Pseudomonas fragi	0	0	0	0	0	0	0	0	0.027571	0	0	0.082713		OTU248	Bacteria; Bacteroidetes; Bacteroidia; Bacteroidales; Prevotellaceae; Prevotella; unclassified	0	0.0541272	0	0	0	0	0	0	0.0541272	0.0270636	0	0		OTU0248	Bacteria; Actinobacteria; Actinobacteria; Actinomycetales; Corynebacteriaceae; Corynebacterium; Corynebacterium durum	0	0	0	0.0285796	0.0285796	0	0	0	0	0.0285796	0	0		OTU248	Bacteria; Fusobacteria; Fusobacteria; Fusobacteriales; Fusobacteriaceae; Fusobacterium; unclassified	0	0	0
OTU249	Bacteria; Bacteroidetes; Flavobacteria; Flavobacteriales; Flavobacteriaceae; Capnocytophaga; unclassified	0	0	0	0	0	0	0	0.027571	0.027571	0.027571	0.027571	0		OTU249	Bacteria; Proteobacteria; Betaproteobacteria; Burkholderiales; Burkholderiaceae; Lautropia; unclassified	0	0.0270636	0	0	0	0.0541272	0	0	0.0270636	0	0	0		OTU0249	Bacteria; Bacteroidetes; Bacteroidia; Bacteroidales; Prevotellaceae; Prevotella; unclassified	0	0	0	0	0	0	0.0285796	0	0.0571592	0	0	0		OTU249	Bacteria; Firmicutes; Clostridia; Clostridiales; unclassified; unclassified; unclassified	0	0	0
OTU250	Bacteria; Firmicutes; Clostridia; Clostridiales; ClostridialesFamilyXIII.IncertaeSedis; Eubacterium; unclassified	0	0.027571	0	0	0.027571	0	0	0	0.027571	0.027571	0	0		OTU250	Bacteria; Proteobacteria; Betaproteobacteria; Neisseriales; Neisseriaceae; unclassified; unclassified	0.0270636	0	0	0.0270636	0	0	0	0.0270636	0.0270636	0	0	0		OTU0250	Bacteria; Firmicutes; Clostridia; Clostridiales; Veillonellaceae; Anaeroglobus; unclassified	0	0.0285796	0.0571592	0	0	0	0	0	0	0	0	0		OTU250	Bacteria; Firmicutes; Clostridia; Clostridiales; Eubacteriaceae; Eubacterium; Eubacterium yuri	0.220568	0.055142	0.082713
OTU251	Bacteria; Proteobacteria; Betaproteobacteria; Burkholderiales; Burkholderiaceae; Lautropia; unclassified	0	0.027571	0	0	0	0	0	0	0	0.027571	0.027571	0.027571		OTU251	Bacteria; Actinobacteria; Actinobacteria; Actinomycetales; Propionibacteriaceae; unclassified; unclassified	0	0	0	0.0270636	0	0	0.0541272	0.0270636	0	0	0	0		OTU0251	Bacteria; Actinobacteria; Actinobacteria; Actinomycetales; Micrococcaceae; Rothia; unclassified	0.0285796	0	0	0	0	0	0	0	0	0	0.0285796	0.0285796		OTU251	Bacteria; Actinobacteria; Actinobacteria; Actinomycetales; Propionibacteriaceae; Propionibacterium; Propionibacterium acnes	0	0	0
OTU252	Bacteria; Actinobacteria; Actinobacteria; Actinomycetales; Corynebacteriaceae; Corynebacterium; Corynebacterium durum	0.027571	0	0	0	0	0	0.027571	0	0	0.027571	0.027571	0		OTU252	Bacteria; Proteobacteria; Betaproteobacteria; unclassified; unclassified; unclassified; unclassified	0	0.0270636	0	0.0270636	0.0270636	0	0	0	0.0270636	0	0	0		OTU0252	Bacteria; TM7; TM7-3; EW055; unclassified; unclassified; unclassified	0	0	0.0857388	0	0	0	0	0	0	0	0	0		OTU252	Bacteria; Proteobacteria; Epsilonproteobacteria; Campylobacterales; Campylobacteraceae; Campylobacter; Campylobacter rectus	0	0	0
OTU253	Bacteria; Proteobacteria; Betaproteobacteria; Neisseriales; Neisseriaceae; Neisseria; unclassified	0	0	0	0.055142	0.027571	0	0	0.027571	0	0	0	0		OTU253	Bacteria; Proteobacteria; Betaproteobacteria; Neisseriales; Neisseriaceae; Neisseria; unclassified	0	0	0	0	0	0.0541272	0.0270636	0	0	0	0	0.0270636		OTU0253	Bacteria; Proteobacteria; Betaproteobacteria; Neisseriales; Neisseriaceae; Simonsiella; unclassified	0	0	0	0	0	0	0	0.0285796	0	0.0285796	0	0.0285796		OTU253	Bacteria; Actinobacteria; Actinobacteria; Actinomycetales; Propionibacteriaceae; unclassified; unclassified	0.055142	0	0
OTU254	Bacteria; Firmicutes; Bacilli; Lactobacillales; Streptococcaceae; Streptococcus; unclassified	0	0	0	0.055142	0.027571	0	0	0	0	0.027571	0	0		OTU254	Bacteria; Proteobacteria; Betaproteobacteria; unclassified; unclassified; unclassified; unclassified	0	0	0.0270636	0.0811908	0	0	0	0	0	0	0	0		OTU0254	Bacteria; Proteobacteria; Betaproteobacteria; Neisseriales; Neisseriaceae; Neisseria; unclassified	0	0.0285796	0	0	0.0285796	0	0	0	0	0	0	0		OTU254	Bacteria; Actinobacteria; Actinobacteria; Actinomycetales; Propionibacteriaceae; unclassified; unclassified	0	0	0
OTU255	Bacteria; Proteobacteria; Gammaproteobacteria; Pasteurellales; Pasteurellaceae; Aggregatibacter; unclassified	0	0.055142	0	0	0.027571	0	0	0	0	0.027571	0	0		OTU255	Bacteria; Proteobacteria; Betaproteobacteria; Burkholderiales; Burkholderiaceae; Lautropia; unclassified	0	0.0270636	0	0	0	0	0	0	0	0.0270636	0.0270636	0.0270636		OTU0255	Bacteria; Actinobacteria; Actinobacteria; Actinomycetales; Propionibacteriaceae; unclassified; unclassified	0	0	0	0	0	0	0.0285796	0.0285796	0	0	0	0		OTU255	Bacteria; unclassified; unclassified; unclassified; unclassified; unclassified; unclassified	0	0	0
OTU256	Bacteria; Proteobacteria; Betaproteobacteria; Neisseriales; Neisseriaceae; Simonsiella; unclassified	0	0	0	0	0	0	0	0.027571	0	0	0.027571	0.055142		OTU256	Bacteria; Proteobacteria; Epsilonproteobacteria; Campylobacterales; Campylobacteraceae; Campylobacter; Campylobacter rectus	0	0	0	0	0	0	0.0270636	0	0.0541272	0.0270636	0	0		OTU0256	Bacteria; TM7; TM7-3; EW055; unclassified; unclassified; unclassified	0	0	0	0	0	0	0	0	0.0571592	0	0	0		OTU256	Bacteria; Firmicutes; Clostridia; Clostridiales; ClostridialesFamilyXIII.IncertaeSedis; Mogibacterium; unclassified	0.055142	0.082713	0.027571
OTU257	Bacteria; Proteobacteria; Betaproteobacteria; unclassified; unclassified; unclassified; unclassified	0	0.027571	0	0.027571	0	0	0	0	0	0.027571	0.027571	0		OTU257	Bacteria; Proteobacteria; Betaproteobacteria; unclassified; unclassified; unclassified; unclassified	0	0.0270636	0.0270636	0.0541272	0	0	0	0	0	0	0	0		OTU0257	Bacteria; Actinobacteria; Actinobacteria; Actinomycetales; Actinomycetaceae; Actinomyces; unclassified	0.0285796	0	0	0	0	0	0	0	0	0	0.0285796	0		OTU257	Bacteria; Firmicutes; Clostridia; Clostridiales; unclassified; unclassified; unclassified	0.110284	0.055142	0.082713
OTU258	Bacteria; Bacteroidetes; Bacteroidia; Bacteroidales; Prevotellaceae; Prevotella; Prevotella baroniae	0	0.027571	0	0	0	0	0	0	0.082713	0	0	0		OTU258	Bacteria; Spirochaetes; Spirochaetes; Spirochaetales; Spirochaetaceae; Treponema; Treponema amylovorum	0	0	0	0.0270636	0	0	0.0270636	0.0270636	0	0.0270636	0	0		OTU0258	Bacteria; Firmicutes; Bacilli; Lactobacillales; Leuconostocaceae; Leuconostoc; unclassified	0	0	0.0285796	0.0285796	0	0	0	0	0	0	0	0		OTU258	Bacteria; Firmicutes; Clostridia; Clostridiales; ClostridialesFamilyXIII.IncertaeSedis; Eubacterium; unclassified	0	0.027571	0.027571
OTU259	Bacteria; Proteobacteria; Betaproteobacteria; unclassified; unclassified; unclassified; unclassified	0	0	0	0.082713	0	0	0	0	0	0.027571	0	0		OTU259	Bacteria; Fusobacteria; Fusobacteria; Fusobacteriales; Fusobacteriaceae; Fusobacterium; unclassified	0	0.0270636	0.0270636	0.0270636	0	0	0	0	0	0	0.0270636	0		OTU0259	Bacteria; Bacteroidetes; Bacteroidia; Bacteroidales; Prevotellaceae; Prevotella; Prevotella melaninogenica	0	0.0285796	0	0	0	0.0285796	0	0	0	0	0	0		OTU259	Bacteria; Fusobacteria; Fusobacteria; Fusobacteriales; Fusobacteriaceae; Fusobacterium; unclassified	0	0	0
OTU260	Bacteria; Proteobacteria; Betaproteobacteria; Neisseriales; Neisseriaceae; Simonsiella; Simonsiella muelleri	0.055142	0.055142	0	0	0	0	0	0	0	0	0	0		OTU260	Bacteria; Proteobacteria; Betaproteobacteria; Neisseriales; Neisseriaceae; Neisseria; unclassified	0	0	0.0541272	0	0	0	0	0	0	0.0270636	0.0270636	0		OTU0260	Bacteria; Firmicutes; Clostridia; Clostridiales; Veillonellaceae; Anaeroglobus; unclassified	0	0.0285796	0.0285796	0	0	0	0	0	0	0	0	0		OTU260	Bacteria; Firmicutes; Clostridia; Clostridiales; unclassified; unclassified; unclassified	0.027571	0	0.027571
OTU261	Bacteria; Bacteroidetes; unclassified; unclassified; unclassified; unclassified; unclassified	0	0	0	0	0	0.027571	0	0	0.082713	0	0	0		OTU261	Bacteria; Bacteroidetes; Bacteroidia; Bacteroidales; Prevotellaceae; Prevotella; unclassified	0.0270636	0	0	0.0270636	0	0	0	0	0	0	0.0270636	0.0270636		OTU0261	Bacteria; Proteobacteria; Betaproteobacteria; Burkholderiales; Burkholderiaceae; Lautropia; unclassified	0	0	0	0	0	0.0285796	0	0	0	0	0	0.0285796		OTU261	Bacteria; Firmicutes; Clostridia; Clostridiales; Peptostreptococcaceae; Filifactor; unclassified	0.055142	0.055142	0.082713
OTU262	Bacteria; Bacteroidetes; Bacteroidia; Bacteroidales; Porphyromonadaceae; Porphyromonas; unclassified	0	0	0	0	0	0.027571	0	0	0	0	0.027571	0.055142		OTU262	Bacteria; Proteobacteria; Epsilonproteobacteria; Campylobacterales; Campylobacteraceae; Campylobacter; Campylobacter rectus	0	0	0	0	0	0	0.0270636	0	0.0270636	0.0270636	0.0270636	0		OTU0262	Bacteria; Firmicutes; Clostridia; Clostridiales; Veillonellaceae; Selenomonas; unclassified	0	0.0571592	0	0	0	0	0	0	0	0	0	0		OTU262	Bacteria; Actinobacteria; Actinobacteria; Actinomycetales; Gordoniaceae; Gordonia; unclassified	0	0	0
OTU263	Bacteria; Proteobacteria; Betaproteobacteria; Neisseriales; Neisseriaceae; Neisseria; unclassified	0	0.027571	0	0.027571	0	0	0	0	0	0.055142	0	0		OTU263	Bacteria; TM7; TM7-3; EW055; unclassified; unclassified; unclassified	0	0	0.0270636	0	0	0	0	0	0	0	0.0270636	0.0541272		OTU0263	Bacteria; Proteobacteria; Betaproteobacteria; Burkholderiales; Burkholderiaceae; Lautropia; unclassified	0	0	0	0	0	0	0.0285796	0	0	0.0285796	0	0		OTU263	Bacteria; Fusobacteria; Fusobacteria; Fusobacteriales; Fusobacteriaceae; Fusobacterium; unclassified	0	0	0
OTU264	Bacteria; Fusobacteria; Fusobacteria; Fusobacteriales; Fusobacteriaceae; Leptotrichia; unclassified	0	0	0.027571	0	0.055142	0.027571	0	0	0	0	0	0		OTU264	Bacteria; Actinobacteria; Actinobacteria; Actinomycetales; Micrococcaceae; Rothia; unclassified	0	0	0	0	0	0.0270636	0	0	0	0.0541272	0	0.0270636		OTU0264	Bacteria; Firmicutes; Clostridia; Clostridiales; Veillonellaceae; Selenomonas; unclassified	0	0	0	0	0	0.0285796	0.0285796	0	0	0	0	0		OTU264	Bacteria; Fusobacteria; Fusobacteria; Fusobacteriales; Fusobacteriaceae; Fusobacterium; unclassified	0	0	0
OTU265	Bacteria; Firmicutes; Clostridia; Clostridiales; Lachnospiraceae; unclassified; unclassified	0	0.027571	0	0	0	0	0	0.027571	0.027571	0	0	0.027571		OTU265	Bacteria; Bacteroidetes; Flavobacteria; Flavobacteriales; Flavobacteriaceae; Capnocytophaga; unclassified	0	0	0	0	0	0	0	0	0.108254	0	0	0		OTU0265	Bacteria; Proteobacteria; Betaproteobacteria; Neisseriales; Neisseriaceae; Neisseria; unclassified	0	0	0	0	0	0	0.0285796	0	0	0	0	0.0285796		OTU265	Bacteria; Firmicutes; Clostridia; Clostridiales; Lachnospiraceae; Catonella; unclassified	1.79211	1.57155	1.54398
OTU266	Bacteria; Bacteroidetes; Bacteroidia; Bacteroidales; Prevotellaceae; Prevotella; unclassified	0	0	0	0	0	0	0	0.082713	0	0.027571	0	0		OTU266	Bacteria; Actinobacteria; Actinobacteria; Actinomycetales; Corynebacteriaceae; Corynebacterium; Corynebacterium durum	0.0270636	0	0	0	0	0	0.0270636	0	0	0	0.0270636	0.0270636		OTU0266	Bacteria; Proteobacteria; Betaproteobacteria; Neisseriales; Neisseriaceae; Neisseria; unclassified	0	0.0571592	0	0	0	0	0	0	0	0	0	0		OTU266	Bacteria; Fusobacteria; Fusobacteria; Fusobacteriales; Fusobacteriaceae; Fusobacterium; unclassified	0	0.027571	0.027571
OTU267	Bacteria; Firmicutes; Bacilli; Lactobacillales; Streptococcaceae; Streptococcus; unclassified	0	0.027571	0.027571	0.027571	0.027571	0	0	0	0	0	0	0		OTU267	Bacteria; unclassified; unclassified; unclassified; unclassified; unclassified; unclassified	0	0	0	0.0270636	0	0.0270636	0	0	0	0	0.0270636	0.0270636		OTU0267	Bacteria; Actinobacteria; Actinobacteria; Actinomycetales; Gordoniaceae; Gordonia; unclassified	0	0	0	0	0	0	0	0	0.0571592	0	0	0		OTU267	Bacteria; Fusobacteria; Fusobacteria; Fusobacteriales; Fusobacteriaceae; Leptotrichia; unclassified	0	0.027571	0
OTU268	Bacteria; Bacteroidetes; Bacteroidia; Bacteroidales; Porphyromonadaceae; Porphyromonas; unclassified	0.027571	0	0	0	0	0	0	0.027571	0	0.027571	0	0.027571		OTU268	Bacteria; Proteobacteria; Betaproteobacteria; Neisseriales; Neisseriaceae; Neisseria; unclassified	0	0	0.0270636	0.0541272	0	0	0.0270636	0	0	0	0	0		OTU0268	Bacteria; Bacteroidetes; Bacteroidia; Bacteroidales; Prevotellaceae; Prevotella; unclassified	0	0	0	0	0	0.0285796	0	0.0285796	0	0	0	0		OTU268	Bacteria; Fusobacteria; Fusobacteria; Fusobacteriales; Fusobacteriaceae; Fusobacterium; unclassified	0	0	0.027571
OTU269	Bacteria; Bacteroidetes; Bacteroidia; Bacteroidales; Porphyromonadaceae; Tannerella; unclassified	0	0.027571	0	0.027571	0	0	0	0	0.027571	0	0.027571	0		OTU269	Bacteria; Firmicutes; Clostridia; Clostridiales; Lachnospiraceae; unclassified; unclassified	0	0	0	0.0270636	0.0541272	0	0.0270636	0	0	0	0	0		OTU0269	Bacteria; Firmicutes; Clostridia; Clostridiales; unclassified; unclassified; unclassified	0	0	0	0	0	0	0	0	0.0285796	0	0	0.0285796		OTU269	Bacteria; Fusobacteria; Fusobacteria; Fusobacteriales; Fusobacteriaceae; Leptotrichia; unclassified	0.330852	0.441136	0.248139
OTU270	Bacteria; Firmicutes; Clostridia; Clostridiales; unclassified; unclassified; unclassified	0.027571	0	0	0	0	0	0	0.027571	0	0.027571	0	0.027571		OTU270	Bacteria; Fusobacteria; Fusobacteria; Fusobacteriales; Fusobacteriaceae; Leptotrichia; unclassified	0	0	0.0270636	0	0	0.0270636	0.0270636	0	0	0.0270636	0	0		OTU0270	Bacteria; Bacteroidetes; Bacteroidia; Bacteroidales; Porphyromonadaceae; Porphyromonas; unclassified	0.0285796	0	0	0	0	0	0	0.0285796	0	0	0	0		OTU270	Bacteria; Fusobacteria; Fusobacteria; Fusobacteriales; Fusobacteriaceae; Leptotrichia; unclassified	0.165426	0.165426	0.27571
OTU271	Bacteria; TM7; TM7-3; CW040; F16; unclassified; unclassified	0	0	0	0	0	0	0.027571	0.027571	0.027571	0.027571	0	0		OTU271	Bacteria; Bacteroidetes; Bacteroidia; Bacteroidales; Porphyromonadaceae; Tannerella; unclassified	0	0	0	0	0	0	0.0270636	0.0270636	0	0.0270636	0	0.0270636		OTU0271	Bacteria; Firmicutes; Clostridia; Clostridiales; Peptococcaceae; Peptococcus; unclassified	0	0	0.0285796	0	0.0285796	0	0	0	0	0	0	0		OTU271	Bacteria; Fusobacteria; Fusobacteria; Fusobacteriales; Fusobacteriaceae; Leptotrichia; unclassified	0	0.082713	0.027571
OTU272	Bacteria; Actinobacteria; Actinobacteria; Actinomycetales; Micrococcaceae; Rothia; unclassified	0	0	0	0	0	0.027571	0	0	0	0.055142	0	0		OTU272	Bacteria; Proteobacteria; Betaproteobacteria; Burkholderiales; Burkholderiaceae; Lautropia; unclassified	0	0	0	0	0	0	0	0.0270636	0.0541272	0	0.0270636	0		OTU0272	Bacteria; Proteobacteria; Gammaproteobacteria; Pasteurellales; Pasteurellaceae; Haemophilus; Haemophilus parainfluenzae	0	0	0.0285796	0	0	0	0.0285796	0	0	0	0	0		OTU272	Bacteria; Firmicutes; Clostridia; Clostridiales; Eubacteriaceae; Eubacterium; Eubacterium yuri	0.055142	0.027571	0.055142
OTU273	Bacteria; Firmicutes; Clostridia; Clostridiales; Veillonellaceae; Selenomonas; unclassified	0	0	0	0	0.027571	0	0	0	0.027571	0	0	0.027571		OTU273	Bacteria; Bacteroidetes; unclassified; unclassified; unclassified; unclassified; unclassified	0	0	0	0	0	0	0	0	0.0541272	0.0270636	0	0		OTU0273	Bacteria; Proteobacteria; Betaproteobacteria; Neisseriales; Neisseriaceae; Neisseria; unclassified	0	0	0	0	0	0	0	0	0	0.0571592	0	0		OTU273	Bacteria; Fusobacteria; Fusobacteria; Fusobacteriales; Fusobacteriaceae; Leptotrichia; unclassified	0.578991	0.744417	0.661704
OTU274	Bacteria; Spirochaetes; Spirochaetes; Spirochaetales; Spirochaetaceae; Treponema; unclassified	0	0.055142	0	0.027571	0	0	0	0	0	0	0	0		OTU274	Bacteria; TM7; TM7-3; CW040; F16; unclassified; unclassified	0	0	0	0	0	0	0.0270636	0.0270636	0	0.0270636	0	0		OTU0274	Bacteria; Proteobacteria; Gammaproteobacteria; Pseudomonadales; Moraxellaceae; Enhydrobacter; Enhydrobacter aerosaccus	0	0	0	0	0	0	0	0	0	0.0285796	0.0285796	0		OTU274	Bacteria; Proteobacteria; Betaproteobacteria; Burkholderiales; Comamonadaceae; Pelomonas; unclassified	0	0	0
OTU275	Bacteria; Tenericutes; Mollicutes; RF39; unclassified; unclassified; unclassified	0	0	0	0.027571	0	0	0	0	0	0	0.055142	0		OTU275	Bacteria; TM7; TM7-3; EW055; unclassified; unclassified; unclassified	0	0	0.0811908	0	0	0	0	0	0	0	0	0		OTU0275	Bacteria; Actinobacteria; Actinobacteria; Actinomycetales; Actinomycetaceae; Actinomyces; Actinomyces odontolyticus	0	0	0	0	0	0	0	0	0	0.0571592	0	0		OTU275	Bacteria; Fusobacteria; Fusobacteria; Fusobacteriales; Fusobacteriaceae; Fusobacterium; unclassified	0	0	0
OTU276	Bacteria; Bacteroidetes; Bacteroidia; Bacteroidales; Prevotellaceae; Prevotella; unclassified	0	0.027571	0	0	0	0	0	0	0.055142	0	0	0		OTU276	Bacteria; Firmicutes; Clostridia; Clostridiales; Eubacteriaceae; Eubacterium; Eubacterium yuri	0	0	0	0	0	0	0.0270636	0	0.0270636	0	0	0.0270636		OTU0276	Bacteria; Firmicutes; Clostridia; Clostridiales; Lachnospiraceae; unclassified; unclassified	0	0	0	0	0.0571592	0	0	0	0	0	0	0		OTU276	Bacteria; Firmicutes; Clostridia; Clostridiales; ClostridialesFamilyXIII.IncertaeSedis; Eubacterium; unclassified	0.027571	0	0
OTU277	Bacteria; Proteobacteria; Gammaproteobacteria; Pasteurellales; Pasteurellaceae; Haemophilus; Haemophilus parainfluenzae	0	0	0	0.027571	0	0	0	0	0	0	0.055142	0		OTU277	Bacteria; Bacteroidetes; Bacteroidia; Bacteroidales; Prevotellaceae; Prevotella; unclassified	0	0	0.0811908	0	0	0	0	0	0	0	0	0		OTU0277	Bacteria; Firmicutes; Clostridia; Clostridiales; unclassified; unclassified; unclassified	0.0285796	0	0	0	0	0	0	0.0285796	0	0	0	0		OTU277	Bacteria; Firmicutes; Clostridia; Clostridiales; Lachnospiraceae; unclassified; unclassified	0	0.027571	0
OTU278	Bacteria; Bacteroidetes; Bacteroidia; Bacteroidales; Porphyromonadaceae; Tannerella; unclassified	0	0	0	0	0	0	0.027571	0.027571	0	0.027571	0	0		OTU278	Bacteria; Proteobacteria; unclassified; unclassified; unclassified; unclassified; unclassified	0	0.0270636	0	0	0	0	0	0	0.0270636	0	0.0270636	0		OTU0278	Bacteria; Proteobacteria; Gammaproteobacteria; Pasteurellales; Pasteurellaceae; Haemophilus; Haemophilus parainfluenzae	0	0	0	0.0285796	0	0	0	0	0	0	0	0.0285796		OTU278	Bacteria; Fusobacteria; Fusobacteria; Fusobacteriales; Fusobacteriaceae; unclassified; unclassified	0.330852	0.523849	0.413565
OTU279	Bacteria; Bacteroidetes; Flavobacteria; Flavobacteriales; Flavobacteriaceae; Capnocytophaga; unclassified	0	0	0	0	0	0	0	0	0.027571	0	0.027571	0.027571		OTU279	Bacteria; Proteobacteria; Betaproteobacteria; Neisseriales; Neisseriaceae; Neisseria; unclassified	0	0	0	0.0270636	0	0	0.0270636	0	0	0	0	0.0270636		OTU0279	Bacteria; Actinobacteria; Actinobacteria; Actinomycetales; Corynebacteriaceae; Corynebacterium; Corynebacterium durum	0.0285796	0	0	0	0	0	0	0	0	0	0	0.0285796		OTU279	Bacteria; Fusobacteria; Fusobacteria; Fusobacteriales; Fusobacteriaceae; Leptotrichia; unclassified	0	0	0
OTU280	Bacteria; Fusobacteria; Fusobacteria; Fusobacteriales; Fusobacteriaceae; Fusobacterium; unclassified	0	0.027571	0	0	0	0	0	0	0.027571	0.027571	0	0		OTU280	Bacteria; Firmicutes; Bacilli; Lactobacillales; Aerococcaceae; Abiotrophia; Abiotrophia defectiva	0.0270636	0	0	0.0270636	0.0270636	0	0	0	0	0	0	0		OTU0280	Bacteria; Firmicutes; Bacilli; Lactobacillales; Streptococcaceae; Streptococcus; Streptococcus thermophilus	0	0	0	0.0285796	0	0.0285796	0	0	0	0	0	0		OTU280	Bacteria; Fusobacteria; Fusobacteria; Fusobacteriales; Fusobacteriaceae; Leptotrichia; unclassified	0.523849	0.689275	0.771988
OTU281	Bacteria; Fusobacteria; Fusobacteria; Fusobacteriales; Fusobacteriaceae; Leptotrichia; unclassified	0.027571	0.027571	0	0	0	0.027571	0	0	0	0	0	0		OTU281	Bacteria; Firmicutes; Bacilli; Lactobacillales; Streptococcaceae; Streptococcus; unclassified	0	0.0541272	0	0	0.0270636	0	0	0	0	0	0	0		OTU0281	Bacteria; Firmicutes; Bacilli; Gemellales; Gemellaceae; Gemella; unclassified	0.0285796	0	0	0	0	0	0	0.0285796	0	0	0	0		OTU281	Bacteria; Fusobacteria; Fusobacteria; Fusobacteriales; Fusobacteriaceae; Leptotrichia; unclassified	0	0.165426	0.027571
OTU282	Bacteria; Proteobacteria; Betaproteobacteria; Neisseriales; Neisseriaceae; Neisseria; unclassified	0	0	0.055142	0.027571	0	0	0	0	0	0	0	0		OTU282	Bacteria; Proteobacteria; unclassified; unclassified; unclassified; unclassified; unclassified	0	0.0541272	0	0	0	0	0	0.0270636	0	0	0	0		OTU0282	Bacteria; Proteobacteria; Gammaproteobacteria; Pseudomonadales; Moraxellaceae; unclassified; unclassified	0	0	0	0	0.0285796	0.0285796	0	0	0	0	0	0		OTU282	Bacteria; Fusobacteria; Fusobacteria; Fusobacteriales; Fusobacteriaceae; Leptotrichia; unclassified	0.027571	0.137855	0.055142
OTU283	Bacteria; Firmicutes; Bacilli; Lactobacillales; Carnobacteriaceae; Granulicatella; Granulicatella elegans	0	0	0.027571	0	0.027571	0.027571	0	0	0	0	0	0		OTU283	Bacteria; Proteobacteria; Gammaproteobacteria; Pseudomonadales; Pseudomonadaceae; Pseudomonas; Pseudomonas fragi	0	0	0	0	0	0	0	0	0	0	0	0.0811908		OTU0283	Bacteria; Firmicutes; Clostridia; Clostridiales; Lachnospiraceae; Moryella; unclassified	0	0	0	0	0	0	0.0285796	0	0	0	0.0285796	0		OTU283	Bacteria; Fusobacteria; Fusobacteria; Fusobacteriales; Fusobacteriaceae; Leptotrichia; unclassified	0.137855	0.165426	0.027571
OTU284	Bacteria; Proteobacteria; Betaproteobacteria; Neisseriales; Neisseriaceae; Neisseria; unclassified	0	0	0	0.027571	0	0	0.027571	0	0	0	0	0.027571		OTU284	Bacteria; Proteobacteria; Betaproteobacteria; Neisseriales; Neisseriaceae; Neisseria; unclassified	0	0	0	0	0	0.0811908	0	0	0	0	0	0		OTU0284	Bacteria; Proteobacteria; Betaproteobacteria; Neisseriales; Neisseriaceae; Neisseria; unclassified	0	0	0	0.0285796	0	0	0	0	0.0285796	0	0	0		OTU284	Bacteria; Firmicutes; Clostridia; Clostridiales; unclassified; unclassified; unclassified	0.192997	0.110284	0.137855
OTU285	Bacteria; Firmicutes; Clostridia; Clostridiales; Veillonellaceae; Veillonella; unclassified	0	0	0	0	0	0.027571	0	0	0.027571	0	0	0.027571		OTU285	Bacteria; Firmicutes; Bacilli; Lactobacillales; Streptococcaceae; Streptococcus; unclassified	0	0	0.0270636	0.0541272	0	0	0	0	0	0	0	0		OTU0285	Bacteria; Firmicutes; Clostridia; Clostridiales; Lachnospiraceae; unclassified; unclassified	0	0	0	0.0285796	0	0	0	0	0	0	0	0		OTU285	Bacteria; Fusobacteria; Fusobacteria; Fusobacteriales; Fusobacteriaceae; Leptotrichia; unclassified	0.027571	0	0
OTU286	Bacteria; Bacteroidetes; Bacteroidia; Bacteroidales; Prevotellaceae; Prevotella; unclassified	0.027571	0	0	0	0	0	0	0	0.027571	0	0.027571	0		OTU286	Bacteria; Bacteroidetes; Flavobacteria; Flavobacteriales; Flavobacteriaceae; Capnocytophaga; unclassified	0	0	0	0	0	0	0	0.0270636	0.0270636	0	0.0270636	0		OTU0286	Bacteria; Spirochaetes; Spirochaetes; Spirochaetales; Spirochaetaceae; Treponema; Treponema socranskii	0	0.0285796	0	0	0	0	0	0	0	0	0	0		OTU286	Bacteria; Firmicutes; Clostridia; Clostridiales; Lachnospiraceae; unclassified; unclassified	0	0.027571	0.055142
OTU287	Bacteria; Firmicutes; Bacilli; Lactobacillales; Streptococcaceae; Lactococcus; unclassified	0	0	0.027571	0	0.055142	0	0	0	0	0	0	0		OTU287	Bacteria; Firmicutes; Clostridia; Clostridiales; Veillonellaceae; Selenomonas; unclassified	0	0	0	0	0.0270636	0	0.0270636	0	0	0	0	0.0270636		OTU0287	Bacteria; Proteobacteria; Gammaproteobacteria; Pasteurellales; Pasteurellaceae; Haemophilus; Haemophilus influenzae	0	0	0	0	0	0.0285796	0	0	0	0	0	0		OTU287	Bacteria; Firmicutes; Clostridia; Clostridiales; Lachnospiraceae; unclassified; unclassified	0.606562	0.441136	0.330852
OTU288	Bacteria; Bacteroidetes; Flavobacteria; Flavobacteriales; Flavobacteriaceae; Capnocytophaga; unclassified	0	0	0.027571	0	0	0.027571	0	0	0	0	0	0.027571		OTU288	Bacteria; Firmicutes; Bacilli; Lactobacillales; Streptococcaceae; Lactococcus; unclassified	0	0	0.0270636	0	0.0270636	0	0	0	0	0	0	0.0270636		OTU0288	Bacteria; Firmicutes; Clostridia; Clostridiales; Lachnospiraceae; unclassified; unclassified	0	0	0	0	0	0	0	0	0	0	0.0285796	0		OTU288	Bacteria; Fusobacteria; Fusobacteria; Fusobacteriales; Fusobacteriaceae; Leptotrichia; unclassified	0	0	0.027571
OTU289	Bacteria; Actinobacteria; Actinobacteria; Actinomycetales; Gordoniaceae; Gordonia; unclassified	0	0	0	0	0	0	0	0	0.082713	0	0	0		OTU289	Bacteria; Actinobacteria; Actinobacteria; Actinomycetales; Micrococcaceae; Rothia; Rothia aeria	0	0	0	0.0270636	0	0	0.0270636	0	0	0	0.0270636	0		OTU0289	Bacteria; Firmicutes; Clostridia; Clostridiales; Eubacteriaceae; Eubacterium; Eubacterium yuri	0	0	0	0	0.0285796	0	0	0	0	0	0	0		OTU289	Bacteria; Firmicutes; Clostridia; Clostridiales; Lachnospiraceae; Catonella; unclassified	0	0	0
OTU290	Bacteria; Bacteroidetes; Bacteroidia; Bacteroidales; Prevotellaceae; Prevotella; unclassified	0	0	0	0	0	0	0	0	0	0.055142	0.027571	0		OTU290	Bacteria; Firmicutes; Clostridia; Clostridiales; Peptococcaceae; Peptococcus; unclassified	0.0270636	0	0	0.0270636	0	0.0270636	0	0	0	0	0	0		OTU0290	Bacteria; Firmicutes; Clostridia; Clostridiales; Lachnospiraceae; Shuttleworthia; Shuttleworthia satelles	0	0.0285796	0	0	0	0	0	0	0	0	0	0		OTU290	Bacteria; Fusobacteria; Fusobacteria; Fusobacteriales; Fusobacteriaceae; Fusobacterium; unclassified	0.027571	0	0
OTU291	Bacteria; Spirochaetes; Spirochaetes; Spirochaetales; Spirochaetaceae; Treponema; Treponema lecithinolyticum	0	0	0	0	0	0	0	0	0.082713	0	0	0		OTU291	Bacteria; Proteobacteria; Betaproteobacteria; unclassified; unclassified; unclassified; unclassified	0	0	0.0270636	0	0.0270636	0.0270636	0	0	0	0	0	0		OTU0291	Bacteria; Actinobacteria; Actinobacteria; Coriobacteriales; Coriobacteriaceae; Atopobium; unclassified	0	0	0	0	0	0.0285796	0	0	0	0	0	0		OTU291	Bacteria; Fusobacteria; Fusobacteria; Fusobacteriales; Fusobacteriaceae; Leptotrichia; unclassified	0	0.082713	0.055142
OTU292	Bacteria; Bacteroidetes; Bacteroidia; Bacteroidales; Porphyromonadaceae; Tannerella; unclassified	0	0	0.027571	0	0	0	0.027571	0	0	0	0	0.027571		OTU292	Bacteria; Firmicutes; Bacilli; Lactobacillales; Streptococcaceae; Streptococcus; unclassified	0	0	0	0	0	0	0.0270636	0	0	0	0	0.0541272		OTU0292	Bacteria; Bacteroidetes; Bacteroidia; Bacteroidales; Prevotellaceae; Prevotella; unclassified	0	0	0	0	0	0	0	0	0.0285796	0	0	0		OTU292	Bacteria; Fusobacteria; Fusobacteria; Fusobacteriales; Fusobacteriaceae; Leptotrichia; unclassified	0	0.027571	0
OTU293	Bacteria; Fusobacteria; Fusobacteria; Fusobacteriales; Fusobacteriaceae; unclassified; unclassified	0	0	0	0.055142	0	0	0	0	0	0	0	0.027571		OTU293	Bacteria; Spirochaetes; Spirochaetes; Spirochaetales; Spirochaetaceae; Treponema; unclassified	0	0.0541272	0	0	0	0	0	0	0	0	0	0.0270636		OTU0293	Bacteria; Firmicutes; Bacilli; Lactobacillales; Streptococcaceae; Streptococcus; unclassified	0	0	0	0	0	0	0	0	0	0	0	0.0285796		OTU293	Bacteria; Firmicutes; Clostridia; Clostridiales; unclassified; unclassified; unclassified	0	0.110284	0.055142
OTU294	Bacteria; Bacteroidetes; Bacteroidia; Bacteroidales; Porphyromonadaceae; Porphyromonas; Porphyromonas endodontalis	0	0	0	0.027571	0	0.027571	0	0	0.027571	0	0	0		OTU294	Bacteria; Actinobacteria; Actinobacteria; Actinomycetales; Micrococcaceae; Rothia; Rothia aeria	0	0	0.0270636	0	0	0	0	0	0	0.0541272	0	0		OTU0294	Bacteria; Proteobacteria; Betaproteobacteria; Burkholderiales; Comamonadaceae; Hylemonella; unclassified	0	0	0	0	0	0	0	0	0.0285796	0	0	0		OTU294	Bacteria; Fusobacteria; Fusobacteria; Fusobacteriales; Fusobacteriaceae; Leptotrichia; unclassified	0	0	0
OTU295	Bacteria; Bacteroidetes; Bacteroidia; Bacteroidales; Prevotellaceae; Prevotella; unclassified	0	0	0	0	0	0	0	0	0.055142	0.027571	0	0		OTU295	Bacteria; Bacteroidetes; Bacteroidia; Bacteroidales; Prevotellaceae; Prevotella; unclassified	0	0.0270636	0	0	0	0	0	0	0	0	0	0.0541272		OTU0295	Bacteria; Firmicutes; Bacilli; Bacillales; Listeriaceae; Brochothrix; unclassified	0	0	0	0	0	0	0	0	0	0	0.0285796	0		OTU295	Bacteria; Firmicutes; Clostridia; Clostridiales; unclassified; unclassified; unclassified	0	0	0
OTU296	Bacteria; TM7; TM7-3; EW055; unclassified; unclassified; unclassified	0	0	0.082713	0	0	0	0	0	0	0	0	0		OTU296	Bacteria; Proteobacteria; Gammaproteobacteria; Pasteurellales; Pasteurellaceae; Haemophilus; Haemophilus parainfluenzae	0	0.0541272	0	0.0270636	0	0	0	0	0	0	0	0		OTU0296	Bacteria; Firmicutes; Bacilli; Lactobacillales; Carnobacteriaceae; Granulicatella; Granulicatella elegans	0	0	0	0	0.0285796	0	0	0	0	0	0	0		OTU296	Bacteria; Proteobacteria; Epsilonproteobacteria; Campylobacterales; Campylobacteraceae; Campylobacter; unclassified	0	0	0
OTU297	Bacteria; Proteobacteria; Betaproteobacteria; Neisseriales; Neisseriaceae; Neisseria; unclassified	0	0.027571	0	0	0.027571	0.027571	0	0	0	0	0	0		OTU297	Bacteria; Firmicutes; Bacilli; Lactobacillales; Streptococcaceae; Streptococcus; unclassified	0.0270636	0	0	0.0270636	0	0	0	0.0270636	0	0	0	0		OTU0297	Bacteria; Bacteroidetes; Flavobacteria; Flavobacteriales; Flavobacteriaceae; Capnocytophaga; unclassified	0	0	0	0	0	0.0285796	0	0	0	0	0	0		OTU297	Bacteria; Firmicutes; Clostridia; Clostridiales; Peptostreptococcaceae; Peptostreptococcus; unclassified	0.578991	0.27571	0.496278
OTU298	Bacteria; Proteobacteria; Betaproteobacteria; Burkholderiales; Comamonadaceae; Hylemonella; unclassified	0	0	0	0	0	0	0	0	0.055142	0	0	0		OTU298	Bacteria; Bacteroidetes; Flavobacteria; Flavobacteriales; Flavobacteriaceae; Capnocytophaga; unclassified	0	0.0270636	0	0	0	0	0.0270636	0	0	0	0	0.0270636		OTU0298	Bacteria; Bacteroidetes; Bacteroidia; Bacteroidales; Prevotellaceae; Prevotella; unclassified	0	0	0	0	0.0285796	0	0	0	0	0	0	0		OTU298	Bacteria; Firmicutes; Clostridia; Clostridiales; Lachnospiraceae; unclassified; unclassified	0.055142	0.027571	0.082713
OTU299	Bacteria; Proteobacteria; Gammaproteobacteria; Pasteurellales; Pasteurellaceae; unclassified; unclassified	0	0.027571	0	0	0	0	0	0	0.027571	0	0	0		OTU299	Bacteria; Firmicutes; Clostridia; Clostridiales; Veillonellaceae; Selenomonas; unclassified	0	0.0541272	0	0	0	0	0	0.0270636	0	0	0	0		OTU0299	Bacteria; Proteobacteria; Gammaproteobacteria; Pseudomonadales; Moraxellaceae; Acinetobacter; unclassified	0	0	0	0	0	0	0	0	0.0285796	0	0	0		OTU299	Bacteria; Firmicutes; Clostridia; Clostridiales; Lachnospiraceae; Oribacterium; unclassified	0.385994	0.220568	0.248139
OTU300	Bacteria; Proteobacteria; Betaproteobacteria; Neisseriales; Neisseriaceae; Neisseria; Neisseria subflava	0	0	0	0	0	0	0	0	0.055142	0	0	0		OTU300	Bacteria; Spirochaetes; Spirochaetes; Spirochaetales; Spirochaetaceae; Treponema; unclassified	0	0.0541272	0	0	0	0	0	0	0.0270636	0	0	0		OTU0300	Bacteria; Bacteroidetes; Bacteroidia; Bacteroidales; Prevotellaceae; Prevotella; unclassified	0	0	0	0	0	0	0	0	0	0	0	0.0285796		OTU300	Bacteria; Fusobacteria; Fusobacteria; Fusobacteriales; Fusobacteriaceae; Leptotrichia; unclassified	0	0	0
OTU301	Bacteria; Actinobacteria; Actinobacteria; Actinomycetales; Micrococcaceae; Rothia; unclassified	0	0.027571	0.027571	0	0	0	0	0	0	0	0	0		OTU301	Bacteria; Fusobacteria; Fusobacteria; Fusobacteriales; Fusobacteriaceae; Leptotrichia; unclassified	0	0.0270636	0.0541272	0	0	0	0	0	0	0	0	0		OTU0301	Bacteria; Firmicutes; Bacilli; Lactobacillales; Aerococcaceae; Abiotrophia; Abiotrophia defectiva	0.0285796	0	0	0	0	0	0	0	0	0	0	0		OTU301	Bacteria; Fusobacteria; Fusobacteria; Fusobacteriales; Fusobacteriaceae; Streptobacillus; unclassified	0	0	0
OTU302	Bacteria; Spirochaetes; Spirochaetes; Spirochaetales; Spirochaetaceae; Treponema; unclassified	0	0.027571	0	0	0	0	0	0	0.027571	0	0	0		OTU302	Bacteria; Spirochaetes; Spirochaetes; Spirochaetales; Spirochaetaceae; Treponema; unclassified	0	0	0	0	0	0	0.0270636	0	0	0.0541272	0	0		OTU0302	Bacteria; Proteobacteria; Gammaproteobacteria; Xanthomonadales; Xanthomonadaceae; Pseudoxanthomonas; unclassified	0	0	0	0	0	0	0	0	0.0285796	0	0	0		OTU302	Bacteria; Firmicutes; Clostridia; Clostridiales; Lachnospiraceae; Clostridium; unclassified	0.082713	0.027571	0.165426
OTU303	Bacteria; Proteobacteria; Gammaproteobacteria; Pseudomonadales; Moraxellaceae; unclassified; unclassified	0	0	0	0	0.027571	0.027571	0	0	0	0	0	0		OTU303	Bacteria; Bacteroidetes; Bacteroidia; Bacteroidales; Prevotellaceae; Prevotella; Prevotella oulorum	0	0	0	0	0	0	0	0	0	0	0	0.0811908		OTU0303	Bacteria; SR1; unclassified; unclassified; unclassified; unclassified; unclassified	0	0	0	0	0	0.0285796	0	0	0	0	0	0		OTU303	Bacteria; Fusobacteria; Fusobacteria; Fusobacteriales; Fusobacteriaceae; Fusobacterium; unclassified	0	0	0
OTU304	Bacteria; Bacteroidetes; Bacteroidia; Bacteroidales; Prevotellaceae; Prevotella; unclassified	0	0	0	0	0	0	0.027571	0	0.027571	0	0	0		OTU304	Bacteria; Actinobacteria; Actinobacteria; Actinomycetales; Gordoniaceae; Gordonia; unclassified	0	0	0	0	0	0	0	0	0.0811908	0	0	0		OTU0304	Bacteria; Spirochaetes; Spirochaetes; Spirochaetales; Spirochaetaceae; Treponema; unclassified	0	0.0285796	0	0	0	0	0	0	0	0	0	0		OTU304	Bacteria; Firmicutes; Clostridia; Clostridiales; unclassified; unclassified; unclassified	0	0	0
OTU305	Bacteria; Fusobacteria; Fusobacteria; Fusobacteriales; Fusobacteriaceae; unclassified; unclassified	0	0	0	0.027571	0	0	0	0	0	0	0.027571	0		OTU305	Bacteria; Proteobacteria; Betaproteobacteria; Burkholderiales; Burkholderiaceae; Lautropia; unclassified	0	0	0	0.0270636	0	0.0270636	0	0	0	0	0	0		OTU0305	Bacteria; Firmicutes; Clostridia; Clostridiales; Lachnospiraceae; Oribacterium; unclassified	0	0	0	0.0285796	0	0	0	0	0	0	0	0		OTU305	Bacteria; unclassified; unclassified; unclassified; unclassified; unclassified; unclassified	0.137855	0.110284	0.110284
OTU306	Bacteria; Firmicutes; Clostridia; Clostridiales; Peptococcaceae; Peptococcus; unclassified	0.027571	0	0	0	0.027571	0	0	0	0	0	0	0		OTU306	Bacteria; Proteobacteria; Gammaproteobacteria; Pasteurellales; Pasteurellaceae; Haemophilus; unclassified	0	0.0270636	0	0	0	0	0	0	0.0270636	0	0	0		OTU0306	Bacteria; Proteobacteria; Betaproteobacteria; Neisseriales; Neisseriaceae; Simonsiella; Simonsiella muelleri	0	0	0	0	0	0	0.0285796	0	0	0	0	0		OTU306	Bacteria; unclassified; unclassified; unclassified; unclassified; unclassified; unclassified	0.027571	0	0
OTU307	Bacteria; Proteobacteria; Betaproteobacteria; Burkholderiales; Burkholderiaceae; Lautropia; unclassified	0	0	0	0	0	0	0	0.055142	0	0	0	0		OTU307	Bacteria; Bacteroidetes; Bacteroidia; Bacteroidales; Porphyromonadaceae; Tannerella; unclassified	0	0	0	0	0	0	0	0	0.0270636	0	0.0270636	0		OTU0307	Bacteria; Proteobacteria; Betaproteobacteria; Neisseriales; Neisseriaceae; Neisseria; unclassified	0	0	0	0	0	0.0285796	0	0	0	0	0	0		OTU307	Bacteria; SR1; unclassified; unclassified; unclassified; unclassified; unclassified	0	0	0
OTU308	Bacteria; Firmicutes; Clostridia; Clostridiales; Lachnospiraceae; Clostridium; unclassified	0	0	0	0	0	0	0.027571	0	0.027571	0	0	0		OTU308	Bacteria; Fusobacteria; Fusobacteria; Fusobacteriales; Fusobacteriaceae; Leptotrichia; unclassified	0	0	0.0270636	0	0	0.0270636	0	0	0	0	0	0		OTU0308	Bacteria; Proteobacteria; Gammaproteobacteria; Pasteurellales; Pasteurellaceae; Haemophilus; Haemophilus parainfluenzae	0	0	0	0	0	0	0	0.0285796	0	0	0	0		OTU308	Bacteria; Fusobacteria; Fusobacteria; Fusobacteriales; Fusobacteriaceae; unclassified; unclassified	0	0	0
OTU309	Bacteria; Proteobacteria; Betaproteobacteria; Neisseriales; Neisseriaceae; Neisseria; unclassified	0	0	0.055142	0	0	0	0	0	0	0	0	0		OTU309	Bacteria; Proteobacteria; Betaproteobacteria; Neisseriales; Neisseriaceae; Neisseria; Neisseria subflava	0.0270636	0	0	0	0	0.0270636	0	0	0	0	0	0		OTU0309	Bacteria; Proteobacteria; Gammaproteobacteria; Pasteurellales; Pasteurellaceae; Actinobacillus; unclassified	0	0.0285796	0	0	0	0	0	0	0	0	0	0		OTU309	Bacteria; Fusobacteria; Fusobacteria; Fusobacteriales; Fusobacteriaceae; Leptotrichia; unclassified	0	0	0
OTU310	Bacteria; Fusobacteria; Fusobacteria; Fusobacteriales; Fusobacteriaceae; Leptotrichia; unclassified	0	0	0	0.055142	0	0	0	0	0	0	0	0		OTU310	Bacteria; Bacteroidetes; Flavobacteria; Flavobacteriales; Flavobacteriaceae; Capnocytophaga; Capnocytophaga ochracea	0	0	0	0	0	0	0	0	0.0541272	0	0	0		OTU0310	Bacteria; Proteobacteria; Betaproteobacteria; Burkholderiales; Burkholderiaceae; Lautropia; unclassified	0	0	0	0	0	0	0	0	0	0	0	0.0285796		OTU310	Bacteria; SR1; unclassified; unclassified; unclassified; unclassified; unclassified	0.055142	0	0
OTU311	Bacteria; Firmicutes; Clostridia; Clostridiales; Veillonellaceae; Anaeroglobus; unclassified	0	0	0.055142	0	0	0	0	0	0	0	0	0		OTU311	Bacteria; Bacteroidetes; Bacteroidia; Bacteroidales; Prevotellaceae; Prevotella; Prevotella melaninogenica	0	0	0	0	0	0.0541272	0	0	0	0	0	0		OTU0311	Bacteria; Proteobacteria; Alphaproteobacteria; Rhizobiales; Methylobacteriaceae; Methylobacterium; Methylobacterium adhaesivum	0	0	0	0	0	0	0	0	0	0	0.0285796	0		OTU311	Bacteria; Fusobacteria; Fusobacteria; Fusobacteriales; Fusobacteriaceae; unclassified; unclassified	0	0	0
OTU312	Bacteria; Firmicutes; Clostridia; Clostridiales; unclassified; unclassified; unclassified	0	0	0	0	0	0	0	0	0.027571	0	0	0.027571		OTU312	Bacteria; Firmicutes; Bacilli; Lactobacillales; Streptococcaceae; Streptococcus; unclassified	0	0	0	0	0	0.0541272	0	0	0	0	0	0		OTU0312	Bacteria; Actinobacteria; Actinobacteria; Actinomycetales; Corynebacteriaceae; Corynebacterium; unclassified	0	0	0	0	0	0	0	0	0	0	0	0.0285796		OTU312	Bacteria; Firmicutes; Clostridia; Clostridiales; Lachnospiraceae; Moryella; unclassified	0	0	0
OTU313	Bacteria; Proteobacteria; Betaproteobacteria; Neisseriales; Neisseriaceae; Simonsiella; unclassified	0	0	0	0	0	0	0	0.027571	0	0.027571	0	0		OTU313	Bacteria; Fusobacteria; Fusobacteria; Fusobacteriales; Fusobacteriaceae; unclassified; unclassified	0	0	0	0.0270636	0	0	0	0	0	0	0	0.0270636		OTU0313	Bacteria; Spirochaetes; Spirochaetes; Spirochaetales; Spirochaetaceae; Treponema; Treponema parvum	0	0	0	0	0	0	0	0	0	0	0	0.0285796		OTU313	Bacteria; Firmicutes; Clostridia; Clostridiales; Lachnospiraceae; unclassified; unclassified	0	0	0
OTU314	Bacteria; Firmicutes; Bacilli; Lactobacillales; Aerococcaceae; Abiotrophia; Abiotrophia defectiva	0.027571	0	0	0	0.027571	0	0	0	0	0	0	0		OTU314	Bacteria; Bacteroidetes; Flavobacteria; Flavobacteriales; Flavobacteriaceae; Capnocytophaga; unclassified	0	0	0	0	0	0.0541272	0	0	0	0	0	0		OTU0314	Bacteria; Actinobacteria; Actinobacteria; Actinomycetales; Micrococcaceae; unclassified; unclassified	0	0	0	0	0	0	0	0	0	0	0.0285796	0		OTU314	Bacteria; Firmicutes; Clostridia; Clostridiales; Lachnospiraceae; unclassified; unclassified	0.055142	0	0
OTU315	Bacteria; Actinobacteria; Actinobacteria; Actinomycetales; Propionibacteriaceae; unclassified; unclassified	0	0	0	0	0	0	0.027571	0.027571	0	0	0	0		OTU315	Bacteria; Fusobacteria; Fusobacteria; Fusobacteriales; Fusobacteriaceae; Fusobacterium; unclassified	0.0270636	0	0	0	0	0	0	0	0.0270636	0	0	0		OTU0315	Bacteria; Proteobacteria; Betaproteobacteria; Burkholderiales; Burkholderiaceae; Lautropia; unclassified	0	0	0	0.0285796	0	0	0	0	0	0	0	0		OTU315	Bacteria; unclassified; unclassified; unclassified; unclassified; unclassified; unclassified	0	0	0
OTU316	Bacteria; Fusobacteria; Fusobacteria; Fusobacteriales; Fusobacteriaceae; Fusobacterium; unclassified	0	0	0	0	0.027571	0	0	0	0	0	0.027571	0		OTU316	Bacteria; unclassified; unclassified; unclassified; unclassified; unclassified; unclassified	0	0	0	0	0	0.0541272	0	0	0	0	0	0		OTU0316	Bacteria; Proteobacteria; Betaproteobacteria; Neisseriales; Neisseriaceae; Kingella; Kingella kingae	0	0	0	0	0	0	0	0.0285796	0	0	0	0		OTU316	Bacteria; Proteobacteria; Epsilonproteobacteria; Campylobacterales; Campylobacteraceae; Campylobacter; Campylobacter concisus	0.854701	1.02013	0.799559
OTU317	Bacteria; Proteobacteria; Betaproteobacteria; Neisseriales; Neisseriaceae; Neisseria; unclassified	0.027571	0	0.027571	0	0	0	0	0	0	0	0	0		OTU317	Bacteria; Actinobacteria; Actinobacteria; Coriobacteriales; Coriobacteriaceae; Atopobium; unclassified	0	0	0	0	0.0270636	0	0	0	0	0	0.0270636	0		OTU0317	Bacteria; Proteobacteria; Betaproteobacteria; Neisseriales; Neisseriaceae; Kingella; unclassified	0	0	0.0285796	0	0	0	0	0	0	0	0	0		OTU317	Bacteria; Proteobacteria; Epsilonproteobacteria; Campylobacterales; Campylobacteraceae; Campylobacter; unclassified	0	0.027571	0.110284
OTU318	Bacteria; Fusobacteria; Fusobacteria; Fusobacteriales; Fusobacteriaceae; Leptotrichia; unclassified	0	0	0	0.055142	0	0	0	0	0	0	0	0		OTU318	Bacteria; Actinobacteria; Actinobacteria; Actinomycetales; Micrococcaceae; Rothia; unclassified	0	0	0.0270636	0	0.0270636	0	0	0	0	0	0	0		OTU0318	Bacteria; Proteobacteria; Gammaproteobacteria; Pseudomonadales; Pseudomonadaceae; Pseudomonas; Pseudomonas fragi	0	0	0	0	0	0	0	0	0.0285796	0	0	0		OTU318	Bacteria; Proteobacteria; Epsilonproteobacteria; Campylobacterales; Campylobacteraceae; Campylobacter; Campylobacter gracilis	0.027571	0.110284	0.110284
OTU319	Bacteria; Proteobacteria; Betaproteobacteria; Burkholderiales; Burkholderiaceae; Lautropia; unclassified	0	0	0	0	0	0	0.027571	0	0	0.027571	0	0		OTU319	Bacteria; Firmicutes; Bacilli; Lactobacillales; Streptococcaceae; Streptococcus; unclassified	0	0.0270636	0	0	0.0270636	0	0	0	0	0	0	0		OTU0319	Bacteria; Actinobacteria; Actinobacteria; Actinomycetales; Actinomycetaceae; Actinomyces; unclassified	0.0285796	0	0	0	0	0	0	0	0	0	0	0		OTU319	Bacteria; Proteobacteria; Epsilonproteobacteria; Campylobacterales; Campylobacteraceae; Campylobacter; Campylobacter showae	0.055142	0.165426	0.082713
OTU320	Bacteria; Actinobacteria; Actinobacteria; Coriobacteriales; Coriobacteriaceae; Atopobium; unclassified	0	0.027571	0	0	0	0.027571	0	0	0	0	0	0		OTU320	Bacteria; Bacteroidetes; Bacteroidia; Bacteroidales; Prevotellaceae; Prevotella; unclassified	0	0	0	0	0	0	0	0	0.0270636	0	0	0.0270636		OTU0320	Bacteria; Firmicutes; Clostridia; Clostridiales; Veillonellaceae; Selenomonas; unclassified	0	0	0	0	0	0.0285796	0	0	0	0	0	0		OTU320	Bacteria; Firmicutes; Clostridia; Clostridiales; Lachnospiraceae; unclassified; unclassified	0	0	0
OTU321	Bacteria; Spirochaetes; Spirochaetes; Spirochaetales; Spirochaetaceae; Treponema; Treponema lecithinolyticum	0	0	0	0	0.027571	0	0.027571	0	0	0	0	0		OTU321	Bacteria; Proteobacteria; Betaproteobacteria; Neisseriales; Neisseriaceae; Neisseria; unclassified	0	0.0270636	0	0.0270636	0	0	0	0	0	0	0	0		OTU0321	Bacteria; Proteobacteria; Betaproteobacteria; Burkholderiales; Burkholderiaceae; Lautropia; unclassified	0	0	0	0	0	0	0	0.0285796	0	0	0	0		OTU321	Bacteria; unclassified; unclassified; unclassified; unclassified; unclassified; unclassified	0	0	0
OTU322	Bacteria; Bacteroidetes; unclassified; unclassified; unclassified; unclassified; unclassified	0	0	0	0	0	0.027571	0	0	0	0.027571	0	0		OTU322	Bacteria; Firmicutes; Bacilli; Lactobacillales; Streptococcaceae; Streptococcus; unclassified	0	0	0	0.0270636	0.0270636	0	0	0	0	0	0	0		OTU0322	Bacteria; Bacteroidetes; Flavobacteria; Flavobacteriales; Flavobacteriaceae; Capnocytophaga; unclassified	0	0	0	0	0.0285796	0	0	0	0	0	0	0		OTU322	Bacteria; Fusobacteria; Fusobacteria; Fusobacteriales; Fusobacteriaceae; Sneathia; unclassified	0	0	0
OTU323	Bacteria; Bacteroidetes; Bacteroidia; Bacteroidales; Prevotellaceae; Prevotella; unclassified	0	0.055142	0	0	0	0	0	0	0	0	0	0		OTU323	Bacteria; Spirochaetes; Spirochaetes; Spirochaetales; Spirochaetaceae; Treponema; Treponema lecithinolyticum	0	0	0	0	0.0270636	0	0.0270636	0	0	0	0	0		OTU0323	Bacteria; Fusobacteria; Fusobacteria; Fusobacteriales; Fusobacteriaceae; Leptotrichia; unclassified	0	0	0.0285796	0	0	0	0	0	0	0	0	0		OTU323	Bacteria; Proteobacteria; Betaproteobacteria; Neisseriales; Neisseriaceae; unclassified; unclassified	0	0	0
OTU324	Bacteria; Actinobacteria; Actinobacteria; Actinomycetales; Actinomycetaceae; Actinomyces; Actinomyces odontolyticus	0	0	0	0	0	0	0	0	0.027571	0.027571	0	0		OTU324	Bacteria; Proteobacteria; Betaproteobacteria; Burkholderiales; Burkholderiaceae; Lautropia; unclassified	0	0	0	0	0	0	0	0.0270636	0.0270636	0	0	0		OTU0324	Bacteria; Firmicutes; unclassified; unclassified; unclassified; unclassified; unclassified	0	0.0285796	0	0	0	0	0	0	0	0	0	0		OTU324	Bacteria; Proteobacteria; Epsilonproteobacteria; Campylobacterales; Campylobacteraceae; Campylobacter; Campylobacter rectus	0	0	0
OTU325	Bacteria; Proteobacteria; Gammaproteobacteria; Pasteurellales; Pasteurellaceae; Haemophilus; Haemophilus parainfluenzae	0	0	0	0.027571	0	0	0	0	0	0.027571	0	0		OTU325	Bacteria; Firmicutes; Clostridia; Clostridiales; Veillonellaceae; Selenomonas; Selenomonas noxia	0	0	0	0	0	0	0.0270636	0	0.0270636	0	0	0		OTU0325	Bacteria; Proteobacteria; Betaproteobacteria; Neisseriales; Neisseriaceae; Neisseria; unclassified	0	0.0285796	0	0	0	0	0	0	0	0	0	0		OTU325	Bacteria; TM7; TM7-3; I025; Rs-045; unclassified; unclassified	0	0	0
OTU326	Bacteria; Bacteroidetes; Bacteroidia; Bacteroidales; Prevotellaceae; Prevotella; unclassified	0	0	0.027571	0	0	0.027571	0	0	0	0	0	0		OTU326	Bacteria; Actinobacteria; Actinobacteria; Actinomycetales; Micrococcaceae; Rothia; unclassified	0	0.0270636	0	0	0.0270636	0	0	0	0	0	0	0		OTU0326	Bacteria; Firmicutes; Clostridia; Clostridiales; Peptococcaceae; Peptococcus; unclassified	0	0	0	0	0	0	0	0	0	0.0285796	0	0		OTU326	Bacteria; unclassified; unclassified; unclassified; unclassified; unclassified; unclassified	0	0.027571	0
OTU327	Bacteria; Firmicutes; Bacilli; Lactobacillales; Streptococcaceae; Streptococcus; Streptococcus anginosus	0	0	0	0.055142	0	0	0	0	0	0	0	0		OTU327	Bacteria; unclassified; unclassified; unclassified; unclassified; unclassified; unclassified	0	0.0270636	0	0.0270636	0	0	0	0	0	0	0	0		OTU0327	Bacteria; Fusobacteria; Fusobacteria; Fusobacteriales; Fusobacteriaceae; Leptotrichia; unclassified	0	0	0	0	0	0.0285796	0	0	0	0	0	0		OTU327	Bacteria; Proteobacteria; Betaproteobacteria; unclassified; unclassified; unclassified; unclassified	0	0.027571	0
OTU328	Bacteria; Actinobacteria; Actinobacteria; Actinomycetales; Corynebacteriaceae; Corynebacterium; Corynebacterium durum	0	0	0	0	0.027571	0	0	0	0	0.027571	0	0		OTU328	Bacteria; Firmicutes; Clostridia; Clostridiales; Veillonellaceae; Selenomonas; unclassified	0	0	0	0.0270636	0	0	0.0270636	0	0	0	0	0		OTU0328	Bacteria; Firmicutes; Clostridia; Clostridiales; Veillonellaceae; Selenomonas; Selenomonas sputigena	0	0	0	0	0	0	0	0	0.0285796	0	0	0		OTU328	Bacteria; Synergistetes; Synergistia; Synergistales; Dethiosulfovibrionaceae; TG5; unclassified	0.055142	0	0.055142
OTU329	Bacteria; Actinobacteria; Actinobacteria; Actinomycetales; Corynebacteriaceae; Corynebacterium; Corynebacterium matruchotii	0	0	0	0	0	0	0	0.027571	0	0.027571	0	0		OTU329	Bacteria; Firmicutes; Clostridia; Clostridiales; Veillonellaceae; Selenomonas; unclassified	0	0	0	0	0	0.0270636	0.0270636	0	0	0	0	0		OTU0329	Bacteria; Spirochaetes; Spirochaetes; Spirochaetales; Spirochaetaceae; Treponema; unclassified	0	0	0	0	0	0	0	0	0.0285796	0	0	0		OTU329	Bacteria; unclassified; unclassified; unclassified; unclassified; unclassified; unclassified	0.027571	0	0
OTU330	Bacteria; Fusobacteria; Fusobacteria; Fusobacteriales; Fusobacteriaceae; Leptotrichia; unclassified	0	0.027571	0.027571	0	0	0	0	0	0	0	0	0		OTU330	Bacteria; Proteobacteria; Gammaproteobacteria; Pasteurellales; Pasteurellaceae; Haemophilus; Haemophilus parainfluenzae	0	0	0	0.0541272	0	0	0	0	0	0	0	0		OTU0330	Bacteria; Firmicutes; Clostridia; Clostridiales; Veillonellaceae; Selenomonas; Selenomonas sputigena	0	0	0	0	0	0	0	0	0	0.0285796	0	0		OTU330	Bacteria; Synergistetes; Synergistia; Synergistales; Dethiosulfovibrionaceae; TG5; unclassified	0.082713	0.027571	0.027571
OTU331	Bacteria; Firmicutes; Clostridia; Clostridiales; Veillonellaceae; Selenomonas; unclassified	0	0	0	0	0	0	0.027571	0	0	0	0	0.027571		OTU331	Bacteria; Actinobacteria; Actinobacteria; Actinomycetales; Micrococcaceae; Rothia; unclassified	0	0	0	0	0	0.0270636	0	0.0270636	0	0	0	0		OTU0331	Bacteria; Spirochaetes; Spirochaetes; Spirochaetales; Spirochaetaceae; Treponema; Treponema lecithinolyticum	0	0	0	0	0	0	0	0	0.0285796	0	0	0		OTU331	Bacteria; Synergistetes; Synergistia; Synergistales; Dethiosulfovibrionaceae; TG5; unclassified	0	0	0
OTU332	Bacteria; Firmicutes; Bacilli; Lactobacillales; Streptococcaceae; Streptococcus; unclassified	0	0	0	0	0	0	0	0	0	0	0.055142	0		OTU332	Bacteria; Firmicutes; Clostridia; Clostridiales; Lachnospiraceae; Clostridium; unclassified	0	0	0	0	0	0	0.0270636	0	0	0	0	0.0270636		OTU0332	Bacteria; Proteobacteria; Betaproteobacteria; Neisseriales; Neisseriaceae; Neisseria; unclassified	0	0	0	0.0285796	0	0	0	0	0	0	0	0		OTU332	Bacteria; unclassified; unclassified; unclassified; unclassified; unclassified; unclassified	0	0.027571	0
OTU333	Bacteria; Bacteroidetes; Bacteroidia; Bacteroidales; Prevotellaceae; Prevotella; Prevotella oulorum	0	0	0	0	0	0	0	0	0	0.027571	0	0.027571		OTU333	Bacteria; Proteobacteria; Betaproteobacteria; Burkholderiales; Burkholderiaceae; Lautropia; unclassified	0	0.0270636	0	0.0270636	0	0	0	0	0	0	0	0		OTU0333	Bacteria; Actinobacteria; Actinobacteria; Coriobacteriales; Coriobacteriaceae; Atopobium; Atopobium rimae	0	0	0	0	0.0285796	0	0	0	0	0	0	0		OTU333	Bacteria; TM7; TM7-3; I025; Rs-045; unclassified; unclassified	0	0	0
OTU334	Bacteria; Bacteroidetes; Bacteroidia; Bacteroidales; Prevotellaceae; Prevotella; unclassified	0	0	0	0	0	0	0.027571	0	0	0	0.027571	0		OTU334	Bacteria; Firmicutes; Bacilli; Lactobacillales; Streptococcaceae; Streptococcus; unclassified	0	0	0	0.0541272	0	0	0	0	0	0	0	0		OTU0334	Bacteria; Spirochaetes; Spirochaetes; Spirochaetales; Spirochaetaceae; Treponema; unclassified	0	0	0	0	0	0	0.0285796	0	0	0	0	0		OTU334	Bacteria; Fusobacteria; Fusobacteria; Fusobacteriales; Fusobacteriaceae; Fusobacterium; unclassified	0	0	0
OTU335	Bacteria; Firmicutes; Clostridia; Clostridiales; Lachnospiraceae; unclassified; unclassified	0	0	0	0	0.055142	0	0	0	0	0	0	0		OTU335	Bacteria; Bacteroidetes; Bacteroidia; Bacteroidales; Porphyromonadaceae; Tannerella; unclassified	0	0	0.0270636	0	0	0	0.0270636	0	0	0	0	0		OTU0335	Bacteria; Actinobacteria; Actinobacteria; Actinomycetales; Actinomycetaceae; Actinomyces; unclassified	0	0.0285796	0	0	0	0	0	0	0	0	0	0		OTU335	Bacteria; TM7; TM7-3; EW055; unclassified; unclassified; unclassified	0.192997	0.248139	0.358423
OTU336	Bacteria; Spirochaetes; Spirochaetes; Spirochaetales; Spirochaetaceae; Treponema; Treponema lecithinolyticum	0	0	0.027571	0	0	0	0	0	0.027571	0	0	0		OTU336	Bacteria; Proteobacteria; Betaproteobacteria; Neisseriales; Neisseriaceae; Neisseria; unclassified	0	0.0270636	0	0.0270636	0	0	0	0	0	0	0	0		OTU0336	Bacteria; Bacteroidetes; Bacteroidia; Bacteroidales; Prevotellaceae; Prevotella; unclassified	0.0285796	0	0	0	0	0	0	0	0	0	0	0		OTU336	Bacteria; TM7; TM7-3; I025; Rs-045; unclassified; unclassified	0.110284	0.248139	0.27571
OTU337	Bacteria; Proteobacteria; Betaproteobacteria; Burkholderiales; Burkholderiaceae; Lautropia; unclassified	0	0	0	0	0	0	0	0.027571	0	0	0.027571	0		OTU337	Bacteria; Proteobacteria; Betaproteobacteria; unclassified; unclassified; unclassified; unclassified	0	0	0	0.0270636	0	0	0	0.0270636	0	0	0	0		OTU0337	Bacteria; Firmicutes; Clostridia; Clostridiales; Veillonellaceae; Veillonella; unclassified	0	0.0285796	0	0	0	0	0	0	0	0	0	0		OTU337	Bacteria; TM7; TM7-3; unclassified; unclassified; unclassified; unclassified	0.027571	0.303281	0.110284
OTU338	Bacteria; Proteobacteria; unclassified; unclassified; unclassified; unclassified; unclassified	0	0	0	0	0	0	0	0	0	0	0.027571	0.027571		OTU338	Bacteria; Firmicutes; Clostridia; Clostridiales; Veillonellaceae; Anaeroglobus; unclassified	0	0	0.0541272	0	0	0	0	0	0	0	0	0		OTU0338	Bacteria; Proteobacteria; Gammaproteobacteria; Pasteurellales; Pasteurellaceae; Aggregatibacter; Aggregatibacter aphrophilus	0	0	0	0	0	0	0	0	0	0.0285796	0	0		OTU338	Bacteria; TM7; TM7-3; CW040; F16; unclassified; unclassified	0.248139	0.192997	0.192997
OTU339	Bacteria; Firmicutes; Clostridia; Clostridiales; Veillonellaceae; Selenomonas; unclassified	0	0	0	0.027571	0	0	0	0	0	0.027571	0	0		OTU339	Bacteria; Firmicutes; Clostridia; Clostridiales; Veillonellaceae; Anaeroglobus; unclassified	0	0	0.0270636	0	0	0.0270636	0	0	0	0	0	0		OTU0339	Bacteria; Proteobacteria; Deltaproteobacteria; Desulfobacterales; Desulfobulbaceae; Desulfobulbus; unclassified	0	0	0.0285796	0	0	0	0	0	0	0	0	0		OTU339	Bacteria; TM7; TM7-3; EW055; unclassified; unclassified; unclassified	0	0.137855	0.027571
OTU340	Bacteria; Firmicutes; Bacilli; Lactobacillales; Aerococcaceae; Abiotrophia; Abiotrophia defectiva	0	0.027571	0	0	0	0.027571	0	0	0	0	0	0		OTU340	Bacteria; Actinobacteria; Actinobacteria; Actinomycetales; Micrococcaceae; Rothia; Rothia aeria	0	0	0	0.0270636	0	0	0	0.0270636	0	0	0	0		OTU0340	Bacteria; Tenericutes; Erysipelotrichi; Erysipelotrichales; Erysipelotrichaceae; Clostridium; unclassified	0	0	0	0	0	0	0.0285796	0	0	0	0	0		OTU340	Bacteria; TM7; TM7-3; EW055; unclassified; unclassified; unclassified	0	0.027571	0.082713
OTU341	Bacteria; Firmicutes; Clostridia; Clostridiales; Peptococcaceae; Peptococcus; unclassified	0	0	0.027571	0	0	0	0	0	0	0.027571	0	0		OTU341	Bacteria; Firmicutes; Bacilli; Lactobacillales; Streptococcaceae; Streptococcus; unclassified	0	0	0	0.0541272	0	0	0	0	0	0	0	0		OTU0341	Bacteria; Bacteroidetes; Bacteroidia; Bacteroidales; Prevotellaceae; Prevotella; unclassified	0	0	0	0	0	0.0285796	0	0	0	0	0	0		OTU341	Bacteria; TM7; TM7-3; EW055; unclassified; unclassified; unclassified	0.082713	0.110284	0
OTU342	Bacteria; Proteobacteria; Gammaproteobacteria; Pasteurellales; Pasteurellaceae; Haemophilus; unclassified	0	0.027571	0	0.027571	0	0	0	0	0	0	0	0		OTU342	Bacteria; Proteobacteria; Betaproteobacteria; Neisseriales; Neisseriaceae; Neisseria; unclassified	0.0270636	0	0.0270636	0	0	0	0	0	0	0	0	0		OTU0342	Bacteria; Bacteroidetes; Bacteroidia; Bacteroidales; Prevotellaceae; Prevotella; unclassified	0	0.0285796	0	0	0	0	0	0	0	0	0	0		OTU342	Bacteria; Firmicutes; Bacilli; Lactobacillales; Streptococcaceae; Streptococcus; unclassified	0	0	0
OTU343	Bacteria; Firmicutes; Clostridia; Clostridiales; Veillonellaceae; Selenomonas; unclassified	0	0	0	0.027571	0	0	0	0	0	0	0	0.027571		OTU343	Bacteria; Firmicutes; Bacilli; Lactobacillales; Streptococcaceae; Streptococcus; unclassified	0	0	0	0	0	0	0	0	0.0541272	0	0	0		OTU0343	Bacteria; Firmicutes; Bacilli; Bacillales; Bacillaceae; unclassified; unclassified	0.0285796	0	0	0	0	0	0	0	0	0	0	0		OTU343	Bacteria; TM7; TM7-3; EW055; unclassified; unclassified; unclassified	0	0.027571	0
OTU344	Bacteria; Spirochaetes; Spirochaetes; Spirochaetales; Spirochaetaceae; Treponema; unclassified	0	0	0	0	0	0	0.027571	0	0	0	0	0		OTU344	Bacteria; Firmicutes; Clostridia; Clostridiales; unclassified; unclassified; unclassified	0.0270636	0	0	0	0	0	0	0.0270636	0	0	0	0		OTU0344	Bacteria; Proteobacteria; Betaproteobacteria; Neisseriales; Neisseriaceae; Neisseria; unclassified	0	0.0285796	0	0	0	0	0	0	0	0	0	0		OTU344	Bacteria; TM7; TM7-3; EW055; unclassified; unclassified; unclassified	0	0	0.027571
OTU345	Bacteria; Firmicutes; Clostridia; Clostridiales; Veillonellaceae; Veillonella; unclassified	0	0	0	0.027571	0	0	0	0	0	0	0	0		OTU345	Bacteria; Fusobacteria; Fusobacteria; Fusobacteriales; Fusobacteriaceae; Leptotrichia; unclassified	0	0	0	0.0270636	0	0.0270636	0	0	0	0	0	0		OTU0345	Bacteria; Firmicutes; Bacilli; Lactobacillales; Streptococcaceae; Streptococcus; unclassified	0	0	0.0285796	0	0	0	0	0	0	0	0	0		OTU345	Bacteria; unclassified; unclassified; unclassified; unclassified; unclassified; unclassified	0	0.027571	0
OTU346	Bacteria; unclassified; unclassified; unclassified; unclassified; unclassified; unclassified	0	0	0	0.027571	0	0	0	0	0	0	0	0		OTU346	Bacteria; Firmicutes; Bacilli; Lactobacillales; Carnobacteriaceae; Granulicatella; unclassified	0	0	0	0	0	0	0	0	0	0.0541272	0	0		OTU0346	Bacteria; Firmicutes; Clostridia; Clostridiales; Lachnospiraceae; unclassified; unclassified	0	0	0	0	0	0	0	0.0285796	0	0	0	0		OTU346	Bacteria; TM7; TM7-3; unclassified; unclassified; unclassified; unclassified	0	0.027571	0
OTU347	Bacteria; Actinobacteria; Actinobacteria; Actinomycetales; Actinomycetaceae; Actinomyces; unclassified	0.027571	0	0	0	0	0	0	0	0	0	0	0		OTU347	Bacteria; Firmicutes; Clostridia; Clostridiales; Lachnospiraceae; unclassified; unclassified	0	0.0541272	0	0	0	0	0	0	0	0	0	0		OTU0347	Bacteria; Fusobacteria; Fusobacteria; Fusobacteriales; Fusobacteriaceae; Fusobacterium; unclassified	0	0	0	0	0	0	0	0	0.0285796	0	0	0		OTU347	Bacteria; Proteobacteria; Alphaproteobacteria; Rhodobacterales; Rhodobacteraceae; Paracoccus; unclassified	0	0	0
OTU348	Bacteria; Proteobacteria; Betaproteobacteria; Burkholderiales; Burkholderiaceae; unclassified; unclassified	0	0	0	0.027571	0	0	0	0	0	0	0	0		OTU348	Bacteria; Firmicutes; Clostridia; Clostridiales; Veillonellaceae; Veillonella; unclassified	0	0	0	0	0	0	0	0	0.0270636	0	0	0.0270636		OTU0348	Bacteria; Proteobacteria; Gammaproteobacteria; Pasteurellales; Pasteurellaceae; Haemophilus; Haemophilus parainfluenzae	0	0	0	0	0	0	0	0.0285796	0	0	0	0		OTU348	Bacteria; Proteobacteria; Alphaproteobacteria; Rhodobacterales; Rhodobacteraceae; Paracoccus; Paracoccus aminovorans	0	0	0
OTU349	Bacteria; Spirochaetes; Spirochaetes; Spirochaetales; Spirochaetaceae; Treponema; unclassified	0	0.027571	0	0	0	0	0	0	0	0	0	0		OTU349	Bacteria; Bacteroidetes; Bacteroidia; Bacteroidales; Prevotellaceae; Prevotella; unclassified	0	0	0	0	0	0.0270636	0	0.0270636	0	0	0	0		OTU0349	Bacteria; Firmicutes; Clostridia; Clostridiales; Lachnospiraceae; Oribacterium; Oribacterium sinus	0	0.0285796	0	0	0	0	0	0	0	0	0	0		OTU349	Bacteria; Proteobacteria; Alphaproteobacteria; Rhodospirillales; Rhodospirillaceae; Skermanella; unclassified	0	0	0
OTU350	Bacteria; Fusobacteria; Fusobacteria; Fusobacteriales; Fusobacteriaceae; Leptotrichia; unclassified	0	0	0	0.027571	0	0	0	0	0	0	0	0		OTU350	Bacteria; Firmicutes; Clostridia; Clostridiales; Veillonellaceae; Selenomonas; unclassified	0	0.0541272	0	0	0	0	0	0	0	0	0	0		OTU0350	Bacteria; Actinobacteria; Actinobacteria; Actinomycetales; Corynebacteriaceae; Corynebacterium; Corynebacterium matruchotii	0	0	0	0	0	0	0	0.0285796	0	0	0	0		OTU350	Bacteria; Proteobacteria; Alphaproteobacteria; Rhizobiales; Methylobacteriaceae; Methylobacterium; Methylobacterium adhaesivum	0	0	0
OTU351	Bacteria; Fusobacteria; Fusobacteria; Fusobacteriales; Fusobacteriaceae; Fusobacterium; unclassified	0.027571	0	0	0	0	0	0	0	0	0	0	0		OTU351	Bacteria; Firmicutes; Clostridia; Clostridiales; Veillonellaceae; Selenomonas; unclassified	0	0.0270636	0	0	0	0	0	0	0	0	0.0270636	0		OTU0351	Bacteria; Bacteroidetes; Bacteroidia; Bacteroidales; Porphyromonadaceae; Tannerella; unclassified	0	0	0	0	0	0	0	0.0285796	0	0	0	0		OTU351	Bacteria; Firmicutes; Clostridia; Clostridiales; Lachnospiraceae; Clostridium; unclassified	0	0.027571	0
OTU352	Bacteria; Firmicutes; Bacilli; Lactobacillales; Streptococcaceae; Streptococcus; Streptococcus thermophilus	0	0.027571	0	0	0	0	0	0	0	0	0	0		OTU352	Bacteria; Firmicutes; Clostridia; Clostridiales; Peptococcaceae; Peptococcus; unclassified	0	0	0.0270636	0	0	0	0	0	0.0270636	0	0	0		OTU0352	Bacteria; Proteobacteria; Gammaproteobacteria; Pasteurellales; Pasteurellaceae; Haemophilus; Haemophilus influenzae	0	0	0	0	0	0	0	0	0	0	0.0285796	0		OTU352	Bacteria; Proteobacteria; unclassified; unclassified; unclassified; unclassified; unclassified	0	0	0
OTU353	Bacteria; Firmicutes; Clostridia; Clostridiales; unclassified; unclassified; unclassified	0	0	0	0.027571	0	0	0	0	0	0	0	0		OTU353	Bacteria; Bacteroidetes; Bacteroidia; Bacteroidales; Prevotellaceae; Prevotella; Prevotella melaninogenica	0	0	0	0	0	0.0541272	0	0	0	0	0	0		OTU0353	Bacteria; Proteobacteria; Alphaproteobacteria; Rhodospirillales; Rhodospirillaceae; Skermanella; unclassified	0	0	0	0	0	0	0	0	0.0285796	0	0	0
OTU354	Bacteria; TM7; TM7-3; EW055; unclassified; unclassified; unclassified	0	0.027571	0	0	0	0	0	0	0	0	0	0		OTU354	Bacteria; Bacteroidetes; Bacteroidia; Bacteroidales; Prevotellaceae; Prevotella; Prevotella baroniae	0	0.0541272	0	0	0	0	0	0	0	0	0	0		OTU0354	Bacteria; Proteobacteria; Betaproteobacteria; Neisseriales; Neisseriaceae; Neisseria; unclassified	0	0	0	0	0	0	0	0	0	0	0	0.0285796
OTU355	Bacteria; unclassified; unclassified; unclassified; unclassified; unclassified; unclassified	0	0.027571	0	0	0	0	0	0	0	0	0	0		OTU355	Bacteria; Bacteroidetes; Bacteroidia; Bacteroidales; Prevotellaceae; Prevotella; unclassified	0	0	0	0	0	0	0	0	0	0.0270636	0.0270636	0		OTU0355	Bacteria; Proteobacteria; Betaproteobacteria; Neisseriales; Neisseriaceae; Simonsiella; unclassified	0	0	0	0	0	0	0	0.0285796	0	0	0	0
OTU356	Bacteria; Proteobacteria; Betaproteobacteria; Burkholderiales; Burkholderiaceae; Lautropia; unclassified	0	0	0	0.027571	0	0	0	0	0	0	0	0		OTU356	Bacteria; Fusobacteria; Fusobacteria; Fusobacteriales; Fusobacteriaceae; Leptotrichia; unclassified	0.0270636	0.0270636	0	0	0	0	0	0	0	0	0	0		OTU0356	Bacteria; Spirochaetes; Spirochaetes; Spirochaetales; Spirochaetaceae; Treponema; unclassified	0	0	0	0	0.0285796	0	0	0	0	0	0	0
OTU357	Bacteria; Proteobacteria; Gammaproteobacteria; Pseudomonadales; Moraxellaceae; Acinetobacter; unclassified	0	0	0	0	0	0	0	0	0.027571	0	0	0		OTU357	Bacteria; Firmicutes; Bacilli; Gemellales; Gemellaceae; Gemella; Gemella sanguinis	0	0	0.0270636	0	0	0.0270636	0	0	0	0	0	0
OTU358	Bacteria; Proteobacteria; Betaproteobacteria; Neisseriales; Neisseriaceae; Neisseria; unclassified	0	0	0	0	0	0	0	0	0.027571	0	0	0		OTU358	Bacteria; Firmicutes; Bacilli; Lactobacillales; Aerococcaceae; Abiotrophia; Abiotrophia defectiva	0	0.0270636	0	0	0	0.0270636	0	0	0	0	0	0
OTU359	Bacteria; Proteobacteria; Epsilonproteobacteria; Campylobacterales; Campylobacteraceae; Campylobacter; unclassified	0	0	0	0.027571	0	0	0	0	0	0	0	0		OTU359	Bacteria; Firmicutes; Bacilli; Lactobacillales; Carnobacteriaceae; Granulicatella; Granulicatella elegans	0	0	0.0270636	0	0	0.0270636	0	0	0	0	0	0
OTU360	Bacteria; Fusobacteria; Fusobacteria; Fusobacteriales; Fusobacteriaceae; Fusobacterium; unclassified	0	0	0	0	0	0	0	0	0.027571	0	0	0		OTU360	Bacteria; Actinobacteria; Actinobacteria; Actinomycetales; Micrococcaceae; Rothia; unclassified	0	0	0	0	0	0	0	0.0270636	0	0	0	0.0270636
OTU361	Bacteria; Proteobacteria; Betaproteobacteria; Neisseriales; Neisseriaceae; Neisseria; Neisseria subflava	0	0	0	0	0.027571	0	0	0	0	0	0	0		OTU361	Bacteria; unclassified; unclassified; unclassified; unclassified; unclassified; unclassified	0	0	0.0270636	0	0	0	0	0	0	0.0270636	0	0
OTU362	Bacteria; Proteobacteria; Betaproteobacteria; Neisseriales; Neisseriaceae; unclassified; unclassified	0	0	0	0	0	0	0	0	0.027571	0	0	0		OTU362	Bacteria; Firmicutes; Clostridia; Clostridiales; unclassified; unclassified; unclassified	0	0	0	0	0	0	0	0	0.0270636	0	0	0.0270636
OTU363	Bacteria; TM7; TM7-3; EW055; unclassified; unclassified; unclassified	0	0	0	0	0	0	0	0	0.027571	0	0	0		OTU363	Bacteria; Proteobacteria; Betaproteobacteria; Neisseriales; Neisseriaceae; Neisseria; unclassified	0	0	0	0	0	0	0	0	0	0.0270636	0	0.0270636
OTU364	Bacteria; Proteobacteria; Betaproteobacteria; Neisseriales; Neisseriaceae; Neisseria; Neisseria weaveri	0	0	0	0	0	0	0	0	0.027571	0	0	0		OTU364	Bacteria; Bacteroidetes; Bacteroidia; Bacteroidales; Prevotellaceae; Prevotella; unclassified	0	0	0	0	0	0	0	0	0	0.0541272	0	0
OTU365	Bacteria; Proteobacteria; Gammaproteobacteria; Pseudomonadales; Moraxellaceae; unclassified; unclassified	0	0	0	0	0	0	0	0	0.027571	0	0	0		OTU365	Bacteria; Proteobacteria; Betaproteobacteria; Burkholderiales; Burkholderiaceae; Lautropia; unclassified	0	0	0	0	0	0.0270636	0	0	0	0	0.0270636	0
OTU366	Bacteria; Proteobacteria; Gammaproteobacteria; Pasteurellales; Pasteurellaceae; Actinobacillus; unclassified	0	0.027571	0	0	0	0	0	0	0	0	0	0		OTU366	Bacteria; unclassified; unclassified; unclassified; unclassified; unclassified; unclassified	0	0	0	0	0	0	0	0	0	0	0.0270636	0.0270636
OTU367	Bacteria; Proteobacteria; Betaproteobacteria; unclassified; unclassified; unclassified; unclassified	0	0.027571	0	0	0	0	0	0	0	0	0	0		OTU367	Bacteria; Firmicutes; Clostridia; Clostridiales; Veillonellaceae; Selenomonas; unclassified	0	0	0	0	0	0	0	0	0	0	0.0270636	0.0270636
OTU368	Bacteria; unclassified; unclassified; unclassified; unclassified; unclassified; unclassified	0	0	0	0	0	0	0	0	0.027571	0	0	0		OTU368	Bacteria; Firmicutes; Clostridia; Clostridiales; Lachnospiraceae; Moryella; unclassified	0	0	0	0	0	0	0.0270636	0	0	0	0.0270636	0
OTU369	Bacteria; Fusobacteria; Fusobacteria; Fusobacteriales; Fusobacteriaceae; Fusobacterium; unclassified	0	0	0	0	0	0	0	0	0.027571	0	0	0		OTU369	Bacteria; Firmicutes; Clostridia; Clostridiales; Peptostreptococcaceae; Filifactor; unclassified	0	0	0	0	0	0	0	0	0	0.0541272	0	0
OTU370	Bacteria; Proteobacteria; Gammaproteobacteria; Pasteurellales; Pasteurellaceae; Haemophilus; Haemophilus parainfluenzae	0	0	0	0	0	0.027571	0	0	0	0	0	0		OTU370	Bacteria; unclassified; unclassified; unclassified; unclassified; unclassified; unclassified	0	0.0541272	0	0	0	0	0	0	0	0	0	0
OTU371	Bacteria; Firmicutes; Clostridia; Clostridiales; Veillonellaceae; Selenomonas; Selenomonas sputigena	0	0.027571	0	0	0	0	0	0	0	0	0	0		OTU371	Bacteria; Actinobacteria; Actinobacteria; Actinomycetales; Micrococcaceae; Rothia; unclassified	0	0.0541272	0	0	0	0	0	0	0	0	0	0
OTU372	Bacteria; Firmicutes; Bacilli; Lactobacillales; Leuconostocaceae; Leuconostoc; unclassified	0	0	0.027571	0	0	0	0	0	0	0	0	0		OTU372	Bacteria; Firmicutes; Clostridia; Clostridiales; Veillonellaceae; Selenomonas; Selenomonas sputigena	0	0	0	0	0	0	0	0	0	0	0	0.0541272
OTU373	Bacteria; Firmicutes; Clostridia; Clostridiales; Eubacteriaceae; Eubacterium; Eubacterium yuri	0	0	0	0.027571	0	0	0	0	0	0	0	0		OTU373	Bacteria; Proteobacteria; Betaproteobacteria; Burkholderiales; unclassified; unclassified; unclassified	0	0	0	0	0	0	0	0	0.0270636	0.0270636	0	0
OTU374	Bacteria; Bacteroidetes; Bacteroidia; Bacteroidales; Prevotellaceae; Prevotella; unclassified	0.027571	0	0	0	0	0	0	0	0	0	0	0		OTU374	Bacteria; Bacteroidetes; Bacteroidia; Bacteroidales; Prevotellaceae; Prevotella; Prevotella tannerae	0	0	0	0	0	0	0	0	0	0.0541272	0	0
OTU375	Bacteria; Proteobacteria; Gammaproteobacteria; Pasteurellales; Pasteurellaceae; unclassified; unclassified	0	0	0	0.027571	0	0	0	0	0	0	0	0		OTU375	Bacteria; Proteobacteria; Gammaproteobacteria; Pasteurellales; Pasteurellaceae; Haemophilus; Haemophilus parainfluenzae	0	0	0	0.0270636	0	0	0	0	0	0.0270636	0	0
OTU376	Bacteria; Proteobacteria; Gammaproteobacteria; Pasteurellales; Pasteurellaceae; Haemophilus; Haemophilus parainfluenzae	0	0.027571	0	0	0	0	0	0	0	0	0	0		OTU376	Bacteria; Firmicutes; Clostridia; Clostridiales; Veillonellaceae; Selenomonas; unclassified	0	0	0	0	0	0	0	0.0270636	0	0	0	0.0270636
OTU377	Bacteria; Proteobacteria; Gammaproteobacteria; Pasteurellales; Pasteurellaceae; Haemophilus; Haemophilus parainfluenzae	0	0.027571	0	0	0	0	0	0	0	0	0	0		OTU377	Bacteria; Proteobacteria; Betaproteobacteria; Burkholderiales; Burkholderiaceae; Lautropia; unclassified	0	0.0270636	0	0	0	0	0	0	0	0.0270636	0	0
OTU378	Bacteria; Spirochaetes; Spirochaetes; Spirochaetales; Spirochaetaceae; Treponema; unclassified	0	0	0	0	0.027571	0	0	0	0	0	0	0		OTU378	Bacteria; Actinobacteria; Actinobacteria; Actinomycetales; Actinomycetaceae; Actinomyces; Actinomyces odontolyticus	0	0	0	0	0	0	0	0	0	0.0541272	0	0
OTU379	Bacteria; Bacteroidetes; Bacteroidia; Bacteroidales; Prevotellaceae; Prevotella; unclassified	0	0.027571	0	0	0	0	0	0	0	0	0	0		OTU379	Bacteria; Proteobacteria; Betaproteobacteria; Burkholderiales; Burkholderiaceae; unclassified; unclassified	0	0	0	0	0	0	0	0	0.0270636	0.0270636	0	0
OTU380	Bacteria; Proteobacteria; Betaproteobacteria; Neisseriales; Neisseriaceae; Neisseria; Neisseria weaveri	0	0.027571	0	0	0	0	0	0	0	0	0	0		OTU380	Bacteria; Bacteroidetes; Bacteroidia; Bacteroidales; Prevotellaceae; Prevotella; Prevotella melaninogenica	0	0	0	0	0	0	0	0	0.0270636	0.0270636	0	0
OTU381	Bacteria; TM7; TM7-3; I025; Rs-045; unclassified; unclassified	0	0	0	0	0	0	0	0.027571	0	0	0	0		OTU381	Bacteria; Bacteroidetes; Flavobacteria; Flavobacteriales; Flavobacteriaceae; Capnocytophaga; unclassified	0	0	0	0	0	0	0	0	0.0270636	0	0.0270636	0
OTU382	Bacteria; Tenericutes; Erysipelotrichi; Erysipelotrichales; Erysipelotrichaceae; Clostridium; unclassified	0	0	0	0	0	0	0.027571	0	0	0	0	0		OTU382	Bacteria; Proteobacteria; Betaproteobacteria; unclassified; unclassified; unclassified; unclassified	0	0	0	0	0.0270636	0	0	0	0	0	0	0.0270636
OTU383	Bacteria; Firmicutes; Bacilli; Lactobacillales; Streptococcaceae; Streptococcus; Streptococcus thermophilus	0	0	0	0	0	0	0.027571	0	0	0	0	0		OTU383	Bacteria; Proteobacteria; Betaproteobacteria; Neisseriales; Neisseriaceae; Simonsiella; unclassified	0	0	0.0270636	0	0	0	0	0	0	0	0	0
OTU384	Bacteria; Proteobacteria; Betaproteobacteria; Neisseriales; Neisseriaceae; Neisseria; unclassified	0	0.027571	0	0	0	0	0	0	0	0	0	0		OTU384	Bacteria; Firmicutes; Clostridia; Clostridiales; Lachnospiraceae; Catonella; unclassified	0	0	0	0	0	0	0	0	0	0.0270636	0	0
OTU385	Bacteria; Firmicutes; Clostridia; Clostridiales; unclassified; unclassified; unclassified	0	0.027571	0	0	0	0	0	0	0	0	0	0		OTU385	Bacteria; unclassified; unclassified; unclassified; unclassified; unclassified; unclassified	0	0	0	0	0	0	0	0	0	0	0	0.0270636
OTU386	Bacteria; Proteobacteria; Betaproteobacteria; Neisseriales; Neisseriaceae; Neisseria; unclassified	0	0	0	0	0	0	0.027571	0	0	0	0	0		OTU386	Bacteria; Firmicutes; Clostridia; Clostridiales; Eubacteriaceae; Eubacterium; Eubacterium yuri	0	0.0270636	0	0	0	0	0	0	0	0	0	0
OTU387	Bacteria; Actinobacteria; Actinobacteria; Coriobacteriales; Coriobacteriaceae; Atopobium; Atopobium rimae	0	0	0	0	0.027571	0	0	0	0	0	0	0		OTU387	Bacteria; Bacteroidetes; Bacteroidia; Bacteroidales; Prevotellaceae; Prevotella; Prevotella melaninogenica	0	0	0	0	0	0	0	0.0270636	0	0	0	0
OTU388	Bacteria; Firmicutes; Bacilli; Lactobacillales; Streptococcaceae; Streptococcus; Streptococcus infantis	0.027571	0	0	0	0	0	0	0	0	0	0	0		OTU388	Bacteria; Bacteroidetes; Flavobacteria; Flavobacteriales; Flavobacteriaceae; Capnocytophaga; unclassified	0	0	0	0	0.0270636	0	0	0	0	0	0	0
OTU389	Bacteria; Proteobacteria; Betaproteobacteria; Burkholderiales; Burkholderiaceae; Lautropia; unclassified	0	0	0	0	0	0	0	0	0.027571	0	0	0		OTU389	Bacteria; Actinobacteria; Actinobacteria; Actinomycetales; Micrococcaceae; Rothia; Rothia aeria	0	0	0.0270636	0	0	0	0	0	0	0	0	0
OTU390	Bacteria; Proteobacteria; Betaproteobacteria; Burkholderiales; Burkholderiaceae; Lautropia; unclassified	0	0	0	0	0	0	0	0.027571	0	0	0	0		OTU390	Bacteria; unclassified; unclassified; unclassified; unclassified; unclassified; unclassified	0	0.0270636	0	0	0	0	0	0	0	0	0	0
OTU391	Bacteria; Firmicutes; Clostridia; Clostridiales; Veillonellaceae; Selenomonas; unclassified	0	0.027571	0	0	0	0	0	0	0	0	0	0		OTU391	Bacteria; Firmicutes; Clostridia; Clostridiales; Lachnospiraceae; unclassified; unclassified	0	0	0	0	0	0	0	0.0270636	0	0	0	0
OTU392	Bacteria; Actinobacteria; Actinobacteria; Actinomycetales; Actinomycetaceae; Actinomyces; unclassified	0	0	0	0	0	0	0.027571	0	0	0	0	0		OTU392	Bacteria; Actinobacteria; Actinobacteria; Actinomycetales; Propionibacteriaceae; Propionibacterium; Propionibacterium freudenreichii	0	0	0	0	0	0	0	0	0	0	0	0.0270636
OTU393	Bacteria; Firmicutes; Bacilli; Lactobacillales; Carnobacteriaceae; Granulicatella; Granulicatella elegans	0	0	0	0	0.027571	0	0	0	0	0	0	0		OTU393	Bacteria; Firmicutes; Clostridia; Clostridiales; unclassified; unclassified; unclassified	0	0	0	0	0	0	0	0	0	0.0270636	0	0
OTU394	Bacteria; unclassified; unclassified; unclassified; unclassified; unclassified; unclassified	0	0.027571	0	0	0	0	0	0	0	0	0	0		OTU394	Bacteria; Actinobacteria; Actinobacteria; Actinomycetales; Actinomycetaceae; Actinomyces; Actinomycesori	0	0	0	0	0	0	0	0	0	0	0.0270636	0
OTU395	Bacteria; Firmicutes; Clostridia; Clostridiales; Veillonellaceae; Selenomonas; unclassified	0	0	0	0	0	0	0	0.027571	0	0	0	0		OTU395	Bacteria; TM7; TM7-3; unclassified; unclassified; unclassified; unclassified	0	0	0	0	0	0	0	0.0270636	0	0	0	0
OTU396	Bacteria; Bacteroidetes; Bacteroidia; Bacteroidales; Prevotellaceae; Prevotella; unclassified	0	0	0	0	0	0	0	0.027571	0	0	0	0		OTU396	Bacteria; Firmicutes; Bacilli; Lactobacillales; Streptococcaceae; Streptococcus; Streptococcus anginosus	0	0	0	0.0270636	0	0	0	0	0	0	0	0
OTU397	Bacteria; Proteobacteria; Betaproteobacteria; Neisseriales; Neisseriaceae; Neisseria; Neisseria cinerea	0	0	0	0	0.027571	0	0	0	0	0	0	0		OTU397	Bacteria; Firmicutes; Bacilli; Lactobacillales; Carnobacteriaceae; Granulicatella; Granulicatella adiacens	0	0.0270636	0	0	0	0	0	0	0	0	0	0
OTU398	Bacteria; Proteobacteria; Betaproteobacteria; Neisseriales; Neisseriaceae; Neisseria; unclassified	0	0.027571	0	0	0	0	0	0	0	0	0	0		OTU398	Bacteria; Firmicutes; Bacilli; Lactobacillales; Streptococcaceae; Streptococcus; unclassified	0	0	0	0	0.0270636	0	0	0	0	0	0	0
OTU399	Bacteria; Proteobacteria; Betaproteobacteria; Neisseriales; Neisseriaceae; unclassified; unclassified	0	0	0	0	0	0	0.027571	0	0	0	0	0		OTU399	Bacteria; Proteobacteria; unclassified; unclassified; unclassified; unclassified; unclassified	0	0	0	0	0	0	0	0	0	0	0.0270636	0
OTU400	Bacteria; Proteobacteria; Gammaproteobacteria; Pasteurellales; Pasteurellaceae; Haemophilus; Haemophilus parainfluenzae	0	0	0	0	0	0	0	0.027571	0	0	0	0		OTU400	Bacteria; Firmicutes; Clostridia; Clostridiales; Lachnospiraceae; Shuttleworthia; Shuttleworthia satelles	0	0	0	0.0270636	0	0	0	0	0	0	0	0
OTU401	Bacteria; Firmicutes; Clostridia; Clostridiales; Veillonellaceae; Selenomonas; Selenomonas noxia	0	0.027571	0	0	0	0	0	0	0	0	0	0		OTU401	Bacteria; Fusobacteria; Fusobacteria; Fusobacteriales; Fusobacteriaceae; Fusobacterium; unclassified	0	0	0	0	0.0270636	0	0	0	0	0	0	0
OTU402	Bacteria; unclassified; unclassified; unclassified; unclassified; unclassified; unclassified	0.027571	0	0	0	0	0	0	0	0	0	0	0		OTU402	Bacteria; Spirochaetes; Spirochaetes; Spirochaetales; Spirochaetaceae; Treponema; unclassified	0	0	0	0.0270636	0	0	0	0	0	0	0	0
OTU403	Bacteria; Bacteroidetes; Flavobacteria; Flavobacteriales; Flavobacteriaceae; Capnocytophaga; Capnocytophaga ochracea	0	0	0	0	0	0	0.027571	0	0	0	0	0		OTU403	Bacteria; Proteobacteria; Epsilonproteobacteria; Campylobacterales; Campylobacteraceae; Campylobacter; unclassified	0	0	0	0.0270636	0	0	0	0	0	0	0	0
OTU404	Bacteria; Fusobacteria; Fusobacteria; Fusobacteriales; Fusobacteriaceae; Leptotrichia; unclassified	0	0.027571	0	0	0	0	0	0	0	0	0	0		OTU404	Bacteria; Firmicutes; unclassified; unclassified; unclassified; unclassified; unclassified	0	0.0270636	0	0	0	0	0	0	0	0	0	0
OTU405	Bacteria; Proteobacteria; Betaproteobacteria; Neisseriales; Neisseriaceae; Neisseria; Neisseria subflava	0	0	0	0.027571	0	0	0	0	0	0	0	0		OTU405	Bacteria; Firmicutes; Bacilli; Lactobacillales; Streptococcaceae; Streptococcus; unclassified	0	0	0	0	0.0270636	0	0	0	0	0	0	0
OTU406	Bacteria; Firmicutes; Bacilli; Bacillales; Bacillaceae; unclassified; unclassified	0.027571	0	0	0	0	0	0	0	0	0	0	0		OTU406	Bacteria; Actinobacteria; Actinobacteria; Actinomycetales; Corynebacteriaceae; Corynebacterium; unclassified	0	0	0	0	0	0	0	0	0	0	0	0.0270636
OTU407	Bacteria; Firmicutes; Bacilli; Lactobacillales; Streptococcaceae; Streptococcus; unclassified	0.027571	0	0	0	0	0	0	0	0	0	0	0		OTU407	Bacteria; Bacteroidetes; Bacteroidia; Bacteroidales; Prevotellaceae; Prevotella; unclassified	0	0	0	0	0	0	0	0	0	0.0270636	0	0
OTU408	Bacteria; Tenericutes; Erysipelotrichi; Erysipelotrichales; Erysipelotrichaceae; Bulleidia; Bulleidia extructa	0	0	0	0	0	0	0.027571	0	0	0	0	0		OTU408	Bacteria; unclassified; unclassified; unclassified; unclassified; unclassified; unclassified	0	0	0	0	0	0	0	0	0	0.0270636	0	0
OTU409	Bacteria; Proteobacteria; Betaproteobacteria; Neisseriales; Neisseriaceae; Neisseria; Neisseria subflava	0	0	0	0	0	0	0	0.027571	0	0	0	0		OTU409	Bacteria; Proteobacteria; Betaproteobacteria; Neisseriales; Neisseriaceae; Neisseria; unclassified	0	0	0	0.0270636	0	0	0	0	0	0	0	0
OTU410	Bacteria; Firmicutes; Clostridia; Clostridiales; Veillonellaceae; Selenomonas; unclassified	0	0	0	0	0	0	0.027571	0	0	0	0	0		OTU410	Bacteria; Bacteroidetes; Bacteroidia; Bacteroidales; Prevotellaceae; Prevotella; Prevotella nanceiensis	0	0	0	0	0	0	0	0	0.0270636	0	0	0
OTU411	Bacteria; Proteobacteria; Betaproteobacteria; Neisseriales; Neisseriaceae; Neisseria; unclassified	0	0.027571	0	0	0	0	0	0	0	0	0	0		OTU411	Bacteria; unclassified; unclassified; unclassified; unclassified; unclassified; unclassified	0	0	0	0	0	0.0270636	0	0	0	0	0	0
OTU412	Bacteria; TM7; TM7-3; unclassified; unclassified; unclassified; unclassified	0	0.027571	0	0	0	0	0	0	0	0	0	0		OTU412	Bacteria; Fusobacteria; Fusobacteria; Fusobacteriales; Fusobacteriaceae; Streptobacillus; unclassified	0	0	0	0	0	0.0270636	0	0	0	0	0	0
OTU413	Bacteria; Actinobacteria; Actinobacteria; Actinomycetales; Actinomycetaceae; Actinomyces; unclassified	0.027571	0	0	0	0	0	0	0	0	0	0	0		OTU413	Bacteria; Actinobacteria; Actinobacteria; Actinomycetales; Micrococcaceae; Rothia; Rothia aeria	0	0	0	0.0270636	0	0	0	0	0	0	0	0
OTU414	Bacteria; Actinobacteria; Actinobacteria; Actinomycetales; Actinomycetaceae; Actinomyces; unclassified	0	0.027571	0	0	0	0	0	0	0	0	0	0		OTU414	Bacteria; Firmicutes; Bacilli; Lactobacillales; Streptococcaceae; Streptococcus; unclassified	0	0	0.0270636	0	0	0	0	0	0	0	0	0
OTU415	Bacteria; Firmicutes; Clostridia; Clostridiales; Veillonellaceae; Veillonella; unclassified	0	0.027571	0	0	0	0	0	0	0	0	0	0		OTU415	Bacteria; Proteobacteria; Gammaproteobacteria; Pseudomonadales; Moraxellaceae; unclassified; unclassified	0	0	0	0	0.0270636	0	0	0	0	0	0	0
OTU416	Bacteria; Firmicutes; Clostridia; Clostridiales; Lachnospiraceae; unclassified; unclassified	0	0	0	0	0	0	0	0.027571	0	0	0	0		OTU416	Bacteria; unclassified; unclassified; unclassified; unclassified; unclassified; unclassified	0	0	0.0270636	0	0	0	0	0	0	0	0	0
OTU417	Bacteria; Proteobacteria; Betaproteobacteria; Neisseriales; Neisseriaceae; Neisseria; unclassified	0	0.027571	0	0	0	0	0	0	0	0	0	0		OTU417	Bacteria; Proteobacteria; Betaproteobacteria; Burkholderiales; Burkholderiaceae; Lautropia; unclassified	0	0	0	0	0	0	0	0.0270636	0	0	0	0
OTU418	Bacteria; Proteobacteria; Betaproteobacteria; Burkholderiales; Comamonadaceae; Pelomonas; unclassified	0	0	0	0	0	0	0.027571	0	0	0	0	0		OTU418	Bacteria; Fusobacteria; Fusobacteria; Fusobacteriales; Fusobacteriaceae; Leptotrichia; unclassified	0	0.0270636	0	0	0	0	0	0	0	0	0	0
OTU419	Bacteria; Bacteroidetes; Bacteroidia; Bacteroidales; Porphyromonadaceae; Porphyromonas; unclassified	0	0	0	0	0	0	0.027571	0	0	0	0	0		OTU419	Bacteria; Bacteroidetes; Bacteroidia; Bacteroidales; unclassified; unclassified; unclassified	0	0	0	0	0	0	0	0.0270636	0	0	0	0
OTU420	Bacteria; Proteobacteria; Betaproteobacteria; Burkholderiales; Burkholderiaceae; Lautropia; unclassified	0	0	0	0	0	0	0	0.027571	0	0	0	0		OTU420	Bacteria; Proteobacteria; Betaproteobacteria; Neisseriales; Neisseriaceae; Neisseria; Neisseria subflava	0	0.0270636	0	0	0	0	0	0	0	0	0	0
OTU421	Bacteria; Proteobacteria; Alphaproteobacteria; Rhodobacterales; Rhodobacteraceae; Paracoccus; Paracoccus solventivorans	0	0	0	0	0	0	0	0.027571	0	0	0	0		OTU421	Bacteria; unclassified; unclassified; unclassified; unclassified; unclassified; unclassified	0	0	0	0.0270636	0	0	0	0	0	0	0	0
OTU422	Bacteria; Proteobacteria; Betaproteobacteria; Neisseriales; Neisseriaceae; Kingella; Kingella kingae	0	0	0	0	0	0	0	0.027571	0	0	0	0		OTU422	Bacteria; Spirochaetes; Spirochaetes; Spirochaetales; Spirochaetaceae; Treponema; Treponema lecithinolyticum	0	0	0	0	0	0	0	0	0.0270636	0	0	0
OTU423	Bacteria; SR1; unclassified; unclassified; unclassified; unclassified; unclassified	0	0	0	0	0	0.027571	0	0	0	0	0	0		OTU423	Bacteria; Bacteroidetes; Bacteroidia; Bacteroidales; Prevotellaceae; Prevotella; unclassified	0	0	0	0	0	0	0	0.0270636	0	0	0	0
OTU424	Bacteria; unclassified; unclassified; unclassified; unclassified; unclassified; unclassified	0	0.027571	0	0	0	0	0	0	0	0	0	0		OTU424	Bacteria; Actinobacteria; Actinobacteria; Actinomycetales; Micrococcaceae; Rothia; Rothia aeria	0	0	0	0.0270636	0	0	0	0	0	0	0	0
OTU425	Bacteria; Proteobacteria; Betaproteobacteria; Neisseriales; Neisseriaceae; Neisseria; unclassified	0	0	0.027571	0	0	0	0	0	0	0	0	0		OTU425	Bacteria; Bacteroidetes; Bacteroidia; Bacteroidales; Prevotellaceae; Prevotella; Prevotella melaninogenica	0	0	0	0.0270636	0	0	0	0	0	0	0	0
OTU426	Bacteria; Proteobacteria; Alphaproteobacteria; Rhizobiales; Methylobacteriaceae; Methylobacterium; Methylobacterium adhaesivum	0	0	0	0	0	0	0	0	0	0	0.027571	0		OTU426	Bacteria; Bacteroidetes; Bacteroidia; Bacteroidales; Prevotellaceae; Prevotella; Prevotella oris	0	0.0270636	0	0	0	0	0	0	0	0	0	0
OTU427	Bacteria; Proteobacteria; Gammaproteobacteria; Pasteurellales; Pasteurellaceae; Haemophilus; Haemophilus influenzae	0	0	0	0	0	0	0	0	0	0	0.027571	0		OTU427	Bacteria; Proteobacteria; Betaproteobacteria; Neisseriales; Neisseriaceae; Neisseria; unclassified	0	0	0	0	0.0270636	0	0	0	0	0	0	0
OTU428	Bacteria; Bacteroidetes; Flavobacteria; Flavobacteriales; Flavobacteriaceae; Capnocytophaga; unclassified	0	0	0	0	0	0	0	0	0	0.027571	0	0		OTU428	Bacteria; Firmicutes; Bacilli; Lactobacillales; Streptococcaceae; Streptococcus; unclassified	0	0	0.0270636	0	0	0	0	0	0	0	0	0
OTU429	Bacteria; Proteobacteria; Gammaproteobacteria; Pasteurellales; Pasteurellaceae; Aggregatibacter; Aggregatibacter aphrophilus	0	0	0	0	0	0	0	0	0	0.027571	0	0		OTU429	Bacteria; Firmicutes; Bacilli; Lactobacillales; Streptococcaceae; Streptococcus; unclassified	0	0.0270636	0	0	0	0	0	0	0	0	0	0
OTU430	Bacteria; TM7; TM7-3; I025; Rs-045; unclassified; unclassified	0	0	0	0	0	0	0	0	0	0.027571	0	0		OTU430	Bacteria; Bacteroidetes; Bacteroidia; Bacteroidales; Prevotellaceae; Prevotella; unclassified	0.0270636	0	0	0	0	0	0	0	0	0	0	0
OTU431	Bacteria; Firmicutes; Clostridia; Clostridiales; Veillonellaceae; Selenomonas; unclassified	0	0	0	0	0	0.027571	0	0	0	0	0	0		OTU431	Bacteria; Actinobacteria; Actinobacteria; Actinomycetales; Micrococcaceae; Rothia; unclassified	0	0	0	0	0	0	0	0	0	0.0270636	0	0
OTU432	Bacteria; Bacteroidetes; Bacteroidia; Bacteroidales; Prevotellaceae; Prevotella; Prevotella melaninogenica	0	0	0	0	0	0.027571	0	0	0	0	0	0		OTU432	Bacteria; Firmicutes; Bacilli; Lactobacillales; Streptococcaceae; Streptococcus; Streptococcus infantis	0.0270636	0	0	0	0	0	0	0	0	0	0	0
OTU433	Bacteria; Proteobacteria; Betaproteobacteria; Neisseriales; Neisseriaceae; Neisseria; Neisseria subflava	0	0	0	0	0	0.027571	0	0	0	0	0	0		OTU433	Bacteria; Proteobacteria; Epsilonproteobacteria; Campylobacterales; Campylobacteraceae; Campylobacter; Campylobacter concisus	0	0	0	0.0270636	0	0	0	0	0	0	0	0
OTU434	Bacteria; Firmicutes; Clostridia; Clostridiales; Veillonellaceae; Veillonella; Veillonella dispar	0	0	0	0	0	0.027571	0	0	0	0	0	0		OTU434	Bacteria; unclassified; unclassified; unclassified; unclassified; unclassified; unclassified	0	0	0	0.0270636	0	0	0	0	0	0	0	0
OTU435	Bacteria; Proteobacteria; Alphaproteobacteria; Rhodospirillales; Rhodospirillaceae; Skermanella; unclassified	0	0	0	0	0	0	0	0	0.027571	0	0	0		OTU435	Bacteria; TM7; TM7-3; I025; Rs-045; unclassified; unclassified	0	0	0	0	0	0	0	0.0270636	0	0	0	0
OTU436	Bacteria; Actinobacteria; Actinobacteria; Actinomycetales; Actinomycetaceae; Actinomyces; unclassified	0	0	0	0	0	0	0	0	0.027571	0	0	0		OTU436	Bacteria; unclassified; unclassified; unclassified; unclassified; unclassified; unclassified	0	0	0	0	0	0	0	0	0	0.0270636	0	0
OTU437	Bacteria; Firmicutes; Clostridia; Clostridiales; Lachnospiraceae; Moryella; unclassified	0	0	0	0	0	0	0	0	0	0	0.027571	0		OTU437	Bacteria; unclassified; unclassified; unclassified; unclassified; unclassified; unclassified	0	0	0	0	0	0	0	0.0270636	0	0	0	0
OTU438	Bacteria; Fusobacteria; Fusobacteria; Fusobacteriales; Fusobacteriaceae; Fusobacterium; unclassified	0	0	0	0	0	0	0	0	0	0	0.027571	0		OTU438	Bacteria; Firmicutes; Clostridia; Clostridiales; Veillonellaceae; Selenomonas; unclassified	0	0	0	0	0	0	0	0	0	0	0	0.0270636
OTU439	Bacteria; Proteobacteria; Betaproteobacteria; Neisseriales; Neisseriaceae; Neisseria; unclassified	0	0	0	0	0	0	0	0	0.027571	0	0	0		OTU439	Bacteria; Proteobacteria; Betaproteobacteria; Burkholderiales; Burkholderiaceae; unclassified; unclassified	0	0	0	0	0	0.0270636	0	0	0	0	0	0
OTU440	Bacteria; Firmicutes; Clostridia; Clostridiales; Veillonellaceae; Selenomonas; unclassified	0	0	0	0	0	0	0	0	0	0	0	0.027571		OTU440	Bacteria; Bacteroidetes; unclassified; unclassified; unclassified; unclassified; unclassified	0	0	0.0270636	0	0	0	0	0	0	0	0	0
OTU441	Bacteria; Firmicutes; Clostridia; Clostridiales; Veillonellaceae; Anaeroglobus; unclassified	0	0	0.027571	0	0	0	0	0	0	0	0	0		OTU441	Bacteria; Actinobacteria; Actinobacteria; Actinomycetales; Micrococcaceae; Rothia; unclassified	0	0	0	0	0	0	0	0	0	0	0	0.0270636
OTU442	Bacteria; Firmicutes; Clostridia; Clostridiales; Veillonellaceae; Selenomonas; Selenomonas sputigena	0	0	0	0	0	0	0	0	0	0	0.027571	0		OTU442	Bacteria; Actinobacteria; Actinobacteria; Actinomycetales; Micrococcaceae; Rothia; unclassified	0	0	0	0	0	0.0270636	0	0	0	0	0	0
OTU443	Bacteria; Fusobacteria; Fusobacteria; Fusobacteriales; Fusobacteriaceae; Sneathia; unclassified	0	0	0	0	0	0	0	0	0	0	0.027571	0		OTU443	Bacteria; Actinobacteria; Actinobacteria; Actinomycetales; Micrococcaceae; Rothia; Rothia aeria	0	0	0	0	0	0	0	0	0	0.0270636	0	0
OTU444	Bacteria; Bacteroidetes; Bacteroidia; Bacteroidales; Prevotellaceae; Prevotella; unclassified	0	0	0	0	0	0	0	0	0	0.027571	0	0		OTU444	Bacteria; Proteobacteria; Betaproteobacteria; Burkholderiales; Burkholderiaceae; Lautropia; unclassified	0	0	0	0	0	0.0270636	0	0	0	0	0	0
OTU445	Bacteria; Proteobacteria; Deltaproteobacteria; Desulfobacterales; Desulfobulbaceae; Desulfobulbus; unclassified	0	0	0.027571	0	0	0	0	0	0	0	0	0		OTU445	Bacteria; Bacteroidetes; Flavobacteria; Flavobacteriales; Flavobacteriaceae; Capnocytophaga; Capnocytophaga sputigena	0	0.0270636	0	0	0	0	0	0	0	0	0	0
OTU446	Bacteria; Fusobacteria; Fusobacteria; Fusobacteriales; Fusobacteriaceae; Fusobacterium; unclassified	0	0	0.027571	0	0	0	0	0	0	0	0	0		OTU446	Bacteria; Proteobacteria; Betaproteobacteria; Neisseriales; Neisseriaceae; Neisseria; unclassified	0	0.0270636	0	0	0	0	0	0	0	0	0	0
OTU447	Bacteria; Bacteroidetes; Flavobacteria; Flavobacteriales; Flavobacteriaceae; Capnocytophaga; unclassified	0	0	0	0	0	0	0	0	0.027571	0	0	0		OTU447	Bacteria; Proteobacteria; Betaproteobacteria; Burkholderiales; Burkholderiaceae; unclassified; unclassified	0	0	0	0.0270636	0	0	0	0	0	0	0	0
OTU448	Bacteria; Bacteroidetes; Bacteroidia; Bacteroidales; Prevotellaceae; Prevotella; unclassified	0	0	0	0	0	0	0	0.027571	0	0	0	0		OTU448	Bacteria; Fusobacteria; Fusobacteria; Fusobacteriales; Fusobacteriaceae; Fusobacterium; unclassified	0	0	0	0	0	0.0270636	0	0	0	0	0	0
OTU449	Bacteria; Firmicutes; Bacilli; Lactobacillales; Carnobacteriaceae; Granulicatella; unclassified	0	0	0	0	0	0	0	0	0	0.027571	0	0		OTU449	Bacteria; Firmicutes; Bacilli; Lactobacillales; Lactobacillaceae; Lactobacillus; Lactobacillus delbrueckii	0	0	0	0	0	0.0270636	0	0	0	0	0	0
OTU450	Bacteria; Firmicutes; Bacilli; Gemellales; Gemellaceae; Gemella; Gemella sanguinis	0	0	0.027571	0	0	0	0	0	0	0	0	0		OTU450	Bacteria; Bacteroidetes; Bacteroidia; Bacteroidales; Porphyromonadaceae; Porphyromonas; unclassified	0	0	0	0	0	0.0270636	0	0	0	0	0	0
OTU451	Bacteria; Proteobacteria; Betaproteobacteria; Neisseriales; Neisseriaceae; Neisseria; unclassified	0	0	0	0	0	0	0	0	0	0.027571	0	0		OTU451	Bacteria; Proteobacteria; Alphaproteobacteria; Rhodobacterales; Rhodobacteraceae; Paracoccus; Paracoccus solventivorans	0	0	0	0	0	0	0	0.0270636	0	0	0	0
OTU452	Bacteria; Fusobacteria; Fusobacteria; Fusobacteriales; Fusobacteriaceae; unclassified; unclassified	0	0	0	0	0	0	0	0	0.027571	0	0	0		OTU452	Bacteria; Proteobacteria; Betaproteobacteria; Neisseriales; Neisseriaceae; Kingella; Kingella kingae	0	0	0	0	0	0	0	0.0270636	0	0	0	0
OTU453	Bacteria; Actinobacteria; Actinobacteria; Actinomycetales; Micrococcaceae; Rothia; unclassified	0	0	0	0	0	0	0	0	0	0.027571	0	0		OTU453	Bacteria; Firmicutes; Bacilli; Lactobacillales; Streptococcaceae; Streptococcus; Streptococcus oralis	0	0.0270636	0	0	0	0	0	0	0	0	0	0
OTU454	Bacteria; Bacteroidetes; Flavobacteria; Flavobacteriales; Flavobacteriaceae; Capnocytophaga; unclassified	0	0	0	0	0	0	0	0	0	0.027571	0	0		OTU454	Bacteria; TM7; TM7-3; I025; Rs-045; unclassified; unclassified	0	0	0	0.0270636	0	0	0	0	0	0	0	0
OTU455	Bacteria; unclassified; unclassified; unclassified; unclassified; unclassified; unclassified	0	0	0	0	0	0	0	0	0.027571	0	0	0		OTU455	Bacteria; Firmicutes; Clostridia; Clostridiales; Peptococcaceae; Peptococcus; unclassified	0	0	0	0	0	0	0	0	0	0.0270636	0	0
OTU456	Bacteria; Fusobacteria; Fusobacteria; Fusobacteriales; Fusobacteriaceae; Fusobacterium; unclassified	0	0	0	0	0	0	0	0	0.027571	0	0	0		OTU456	Bacteria; Bacteroidetes; Bacteroidia; Bacteroidales; Porphyromonadaceae; Porphyromonas; unclassified	0	0	0	0	0	0	0	0.0270636	0	0	0	0
OTU457	Bacteria; Spirochaetes; Spirochaetes; Spirochaetales; Spirochaetaceae; Treponema; unclassified	0	0	0	0	0	0	0	0	0.027571	0	0	0		OTU457	Bacteria; Fusobacteria; Fusobacteria; Fusobacteriales; Fusobacteriaceae; Leptotrichia; unclassified	0	0	0.0270636	0	0	0	0	0	0	0	0	0
OTU458	Bacteria; Proteobacteria; Betaproteobacteria; Burkholderiales; unclassified; unclassified; unclassified	0	0	0	0	0	0.027571	0	0	0	0	0	0		OTU458	Bacteria; unclassified; unclassified; unclassified; unclassified; unclassified; unclassified	0	0	0	0	0	0	0	0	0	0	0	0.0270636
OTU459	Bacteria; Proteobacteria; Betaproteobacteria; Neisseriales; Neisseriaceae; Neisseria; Neisseria subflava	0	0	0	0	0	0.027571	0	0	0	0	0	0		OTU459	Bacteria; unclassified; unclassified; unclassified; unclassified; unclassified; unclassified	0	0.0270636	0	0	0	0	0	0	0	0	0	0
OTU460	Bacteria; Bacteroidetes; Bacteroidia; Bacteroidales; Prevotellaceae; Prevotella; unclassified	0	0	0	0	0	0	0	0	0.027571	0	0	0		OTU460	Bacteria; Firmicutes; unclassified; unclassified; unclassified; unclassified; unclassified	0	0.0270636	0	0	0	0	0	0	0	0	0	0
OTU461	Bacteria; Firmicutes; Bacilli; Lactobacillales; Streptococcaceae; Streptococcus; Streptococcus pseudopneumoniae	0	0	0	0	0	0	0	0	0	0.027571	0	0		OTU461	Bacteria; Proteobacteria; Gammaproteobacteria; Pasteurellales; Pasteurellaceae; Haemophilus; Haemophilus parainfluenzae	0	0	0	0	0	0	0	0.0270636	0	0	0	0
OTU462	Bacteria; Proteobacteria; Betaproteobacteria; Burkholderiales; Burkholderiaceae; unclassified; unclassified	0	0	0	0	0	0	0	0	0	0.027571	0	0		OTU462	Bacteria; unclassified; unclassified; unclassified; unclassified; unclassified; unclassified	0	0	0	0.0270636	0	0	0	0	0	0	0	0
OTU463	Bacteria; Proteobacteria; Gammaproteobacteria; Pasteurellales; Pasteurellaceae; Haemophilus; Haemophilus influenzae	0	0	0	0	0	0.027571	0	0	0	0	0	0		OTU463	Bacteria; Firmicutes; Bacilli; unclassified; unclassified; unclassified; unclassified	0	0	0	0.0270636	0	0	0	0	0	0	0	0
OTU464	Bacteria; Proteobacteria; Betaproteobacteria; Neisseriales; Neisseriaceae; Neisseria; unclassified	0	0	0	0	0	0	0	0	0.027571	0	0	0		OTU464	Bacteria; Bacteroidetes; Bacteroidia; Bacteroidales; Prevotellaceae; Prevotella; unclassified	0	0	0	0	0	0.0270636	0	0	0	0	0	0
OTU465	Bacteria; Firmicutes; Bacilli; Lactobacillales; Streptococcaceae; Streptococcus; Streptococcus salivarius	0	0	0	0	0	0.027571	0	0	0	0	0	0		OTU465	Bacteria; unclassified; unclassified; unclassified; unclassified; unclassified; unclassified	0	0	0	0.0270636	0	0	0	0	0	0	0	0
OTU466	Bacteria; Proteobacteria; Betaproteobacteria; Burkholderiales; Burkholderiaceae; Lautropia; unclassified	0	0	0	0	0	0	0	0	0.027571	0	0	0		OTU466	Bacteria; Firmicutes; Bacilli; Lactobacillales; Streptococcaceae; Streptococcus; unclassified	0	0	0	0	0	0.0270636	0	0	0	0	0	0
OTU467	Bacteria; Proteobacteria; Betaproteobacteria; Burkholderiales; Burkholderiaceae; unclassified; unclassified	0	0	0	0	0	0	0	0	0.027571	0	0	0		OTU467	Bacteria; Proteobacteria; Betaproteobacteria; Neisseriales; Neisseriaceae; Simonsiella; unclassified	0	0	0	0	0	0	0	0.0270636	0	0	0	0
OTU468	Bacteria; Firmicutes; Clostridia; Clostridiales; Veillonellaceae; Selenomonas; Selenomonas sputigena	0	0	0	0	0	0	0	0	0	0	0	0.027571		OTU468	Bacteria; Proteobacteria; Betaproteobacteria; Neisseriales; Neisseriaceae; unclassified; unclassified	0	0	0	0	0	0	0	0.0270636	0	0	0	0
OTU469	Bacteria; Proteobacteria; Gammaproteobacteria; Pseudomonadales; Moraxellaceae; Acinetobacter; Acinetobacter schindleri	0	0	0	0	0	0	0	0	0.027571	0	0	0		OTU469	Bacteria; Firmicutes; Bacilli; Lactobacillales; Streptococcaceae; Streptococcus; unclassified	0	0	0	0	0	0	0	0.0270636	0	0	0	0
OTU470	Bacteria; unclassified; unclassified; unclassified; unclassified; unclassified; unclassified	0	0	0	0	0	0	0	0	0	0	0	0.027571		OTU470	Bacteria; Proteobacteria; Betaproteobacteria; Neisseriales; Neisseriaceae; Neisseria; Neisseria subflava	0	0	0	0	0	0	0	0	0	0.0270636	0	0
OTU471	Bacteria; Firmicutes; Clostridia; Clostridiales; Veillonellaceae; Selenomonas; unclassified	0	0	0	0	0	0	0	0	0	0	0	0.027571		OTU471	Bacteria; unclassified; unclassified; unclassified; unclassified; unclassified; unclassified	0	0.0270636	0	0	0	0	0	0	0	0	0	0
OTU472	Bacteria; Fusobacteria; Fusobacteria; Fusobacteriales; Fusobacteriaceae; Streptobacillus; unclassified	0	0	0	0	0	0.027571	0	0	0	0	0	0		OTU472	Bacteria; Proteobacteria; Betaproteobacteria; Neisseriales; Neisseriaceae; Neisseria; Neisseria subflava	0	0	0	0	0	0	0	0	0	0.0270636	0	0
OTU473	Bacteria; Firmicutes; Clostridia; Clostridiales; Lachnospiraceae; unclassified; unclassified	0	0	0	0	0	0	0	0	0	0	0	0.027571		OTU473	Bacteria; Proteobacteria; Betaproteobacteria; unclassified; unclassified; unclassified; unclassified	0	0	0	0	0	0.0270636	0	0	0	0	0	0
OTU474	Bacteria; Proteobacteria; Betaproteobacteria; Neisseriales; Neisseriaceae; Neisseria; Neisseria subflava	0	0	0	0	0	0	0	0	0.027571	0	0	0		OTU474	Bacteria; Proteobacteria; Gammaproteobacteria; Pasteurellales; Pasteurellaceae; unclassified; unclassified	0	0.0270636	0	0	0	0	0	0	0	0	0	0
OTU475	Bacteria; Bacteroidetes; Flavobacteria; Flavobacteriales; Flavobacteriaceae; Capnocytophaga; unclassified	0	0	0	0	0	0	0	0	0.027571	0	0	0		OTU475	Bacteria; Bacteroidetes; Bacteroidia; Bacteroidales; Prevotellaceae; Prevotella; Prevotella melaninogenica	0	0	0	0	0	0	0	0.0270636	0	0	0	0
OTU476	Bacteria; Proteobacteria; Betaproteobacteria; Burkholderiales; Burkholderiaceae; Lautropia; unclassified	0	0	0	0	0	0.027571	0	0	0	0	0	0		OTU476	Bacteria; Bacteroidetes; Bacteroidia; Bacteroidales; Porphyromonadaceae; Porphyromonas; unclassified	0	0	0	0	0	0	0	0	0	0	0	0.0270636
OTU477	Bacteria; Proteobacteria; Gammaproteobacteria; Pasteurellales; Pasteurellaceae; unclassified; unclassified	0	0	0	0	0	0	0	0	0	0	0	0.027571		OTU477	Bacteria; unclassified; unclassified; unclassified; unclassified; unclassified; unclassified	0.0270636	0	0	0	0	0	0	0	0	0	0	0
OTU478	Bacteria; Firmicutes; Clostridia; Clostridiales; Veillonellaceae; Selenomonas; Selenomonas sputigena	0	0	0	0	0	0	0	0	0	0	0	0.027571		OTU478	Bacteria; Firmicutes; Bacilli; Gemellales; Gemellaceae; Gemella; unclassified	0	0	0	0	0	0.0270636	0	0	0	0	0	0
OTU479	Bacteria; Bacteroidetes; Bacteroidia; Bacteroidales; Porphyromonadaceae; Porphyromonas; Porphyromonas gingivalis	0	0	0	0	0	0	0	0	0.027571	0	0	0		OTU479	Bacteria; Proteobacteria; Betaproteobacteria; Neisseriales; Neisseriaceae; Neisseria; Neisseria cinerea	0	0	0	0	0.0270636	0	0	0	0	0	0	0
OTU480	Bacteria; Fusobacteria; Fusobacteria; Fusobacteriales; Fusobacteriaceae; Fusobacterium; unclassified	0	0	0	0	0	0	0	0	0.027571	0	0	0		OTU480	Bacteria; Fusobacteria; Fusobacteria; Fusobacteriales; Fusobacteriaceae; Leptotrichia; unclassified	0	0.0270636	0	0	0	0	0	0	0	0	0	0
															OTU481	Bacteria; Firmicutes; Clostridia; Clostridiales; Peptostreptococcaceae; Filifactor; unclassified	0	0	0	0	0	0.0270636	0	0	0	0	0	0
															OTU482	Bacteria; Firmicutes; Bacilli; Lactobacillales; unclassified; unclassified; unclassified	0	0	0	0	0	0.0270636	0	0	0	0	0	0
															OTU483	Bacteria; Proteobacteria; Deltaproteobacteria; Desulfobacterales; Desulfobulbaceae; Desulfobulbus; unclassified	0	0	0.0270636	0	0	0	0	0	0	0	0	0
															OTU484	Bacteria; Firmicutes; Bacilli; Lactobacillales; Streptococcaceae; Streptococcus; unclassified	0	0	0	0.0270636	0	0	0	0	0	0	0	0
															OTU485	Bacteria; Bacteroidetes; Bacteroidia; Bacteroidales; Porphyromonadaceae; Tannerella; unclassified	0	0	0	0	0	0.0270636	0	0	0	0	0	0
															OTU486	Bacteria; Actinobacteria; Actinobacteria; Actinomycetales; Micrococcaceae; Rothia; unclassified	0	0	0	0	0	0.0270636	0	0	0	0	0	0
															OTU487	Bacteria; Proteobacteria; Betaproteobacteria; Neisseriales; Neisseriaceae; Neisseria; Neisseria subflava	0	0	0	0	0	0.0270636	0	0	0	0	0	0
															OTU488	Bacteria; Bacteroidetes; Bacteroidia; Bacteroidales; Prevotellaceae; Prevotella; unclassified	0.0270636	0	0	0	0	0	0	0	0	0	0	0
															OTU489	Bacteria; Bacteroidetes; Bacteroidia; Bacteroidales; Prevotellaceae; Prevotella; unclassified	0	0	0	0	0.0270636	0	0	0	0	0	0	0
															OTU490	Bacteria; Firmicutes; Clostridia; Clostridiales; Veillonellaceae; Veillonella; unclassified	0	0.0270636	0	0	0	0	0	0	0	0	0	0
															OTU491	Bacteria; Firmicutes; Clostridia; Clostridiales; Lachnospiraceae; unclassified; unclassified	0	0.0270636	0	0	0	0	0	0	0	0	0	0
															OTU492	Bacteria; TM7; TM7-3; I025; Rs-045; unclassified; unclassified	0	0.0270636	0	0	0	0	0	0	0	0	0	0
															OTU493	Bacteria; Bacteroidetes; Bacteroidia; Bacteroidales; Prevotellaceae; Prevotella; unclassified	0	0	0	0	0	0.0270636	0	0	0	0	0	0
															OTU494	Bacteria; TM7; TM7-3; I025; Rs-045; unclassified; unclassified	0	0.0270636	0	0	0	0	0	0	0	0	0	0
															OTU495	Bacteria; TM7; TM7-3; I025; Rs-045; unclassified; unclassified	0	0.0270636	0	0	0	0	0	0	0	0	0	0
															OTU496	Bacteria; TM7; TM7-3; unclassified; unclassified; unclassified; unclassified	0	0.0270636	0	0	0	0	0	0	0	0	0	0
															OTU497	Bacteria; Proteobacteria; Betaproteobacteria; Burkholderiales; Comamonadaceae; Hylemonella; unclassified	0	0	0	0	0	0	0	0	0	0.0270636	0	0
															OTU498	Bacteria; Firmicutes; Bacilli; Bacillales; Bacillaceae; Geobacillus; unclassified	0.0270636	0	0	0	0	0	0	0	0	0	0	0
															OTU499	Bacteria; Firmicutes; Bacilli; Lactobacillales; Streptococcaceae; Streptococcus; unclassified	0	0.0270636	0	0	0	0	0	0	0	0	0	0
															OTU500	Bacteria; Proteobacteria; Gammaproteobacteria; Pasteurellales; Pasteurellaceae; Haemophilus; Haemophilus influenzae	0	0	0	0	0	0.0270636	0	0	0	0	0	0
															OTU501	Bacteria; unclassified; unclassified; unclassified; unclassified; unclassified; unclassified	0	0.0270636	0	0	0	0	0	0	0	0	0	0
															OTU502	Bacteria; Proteobacteria; Betaproteobacteria; Neisseriales; Neisseriaceae; Neisseria; unclassified	0	0.0270636	0	0	0	0	0	0	0	0	0	0
															OTU503	Bacteria; Actinobacteria; Actinobacteria; Actinomycetales; Micrococcaceae; Rothia; Rothia aeria	0	0	0	0.0270636	0	0	0	0	0	0	0	0
															OTU504	Bacteria; Bacteroidetes; Bacteroidia; Bacteroidales; Prevotellaceae; Prevotella; unclassified	0	0	0	0	0	0	0	0	0.0270636	0	0	0
															OTU505	Bacteria; Firmicutes; Bacilli; Gemellales; Gemellaceae; Gemella; Gemella sanguinis	0	0	0	0.0270636	0	0	0	0	0	0	0	0
															OTU506	Bacteria; unclassified; unclassified; unclassified; unclassified; unclassified; unclassified	0	0	0.0270636	0	0	0	0	0	0	0	0	0
															OTU507	Bacteria; Bacteroidetes; Bacteroidia; Bacteroidales; unclassified; unclassified; unclassified	0	0	0	0	0	0	0	0	0.0270636	0	0	0
															OTU508	Bacteria; Proteobacteria; Gammaproteobacteria; Pasteurellales; Pasteurellaceae; Aggregatibacter; Aggregatibacter aphrophilus	0	0	0	0	0	0	0	0	0	0.0270636	0	0
															OTU509	Bacteria; Proteobacteria; Alphaproteobacteria; Rhodospirillales; Rhodospirillaceae; Skermanella; unclassified	0	0	0	0	0	0	0	0	0.0270636	0	0	0
															OTU510	Bacteria; Proteobacteria; Betaproteobacteria; Neisseriales; Neisseriaceae; Simonsiella; Simonsiella muelleri	0	0	0	0	0	0	0.0270636	0	0	0	0	0
															OTU511	Bacteria; Proteobacteria; Betaproteobacteria; Neisseriales; Neisseriaceae; unclassified; unclassified	0	0	0	0	0	0	0	0	0.0270636	0	0	0
															OTU512	Bacteria; Fusobacteria; Fusobacteria; Fusobacteriales; Fusobacteriaceae; Fusobacterium; unclassified	0	0	0	0	0	0	0	0	0.0270636	0	0	0
															OTU513	Bacteria; Proteobacteria; Betaproteobacteria; Neisseriales; Neisseriaceae; Neisseria; Neisseria subflava	0	0	0	0	0	0.0270636	0	0	0	0	0	0
															OTU514	Bacteria; Tenericutes; Erysipelotrichi; Erysipelotrichales; Erysipelotrichaceae; Bulleidia; Bulleidia extructa	0	0	0	0	0	0	0	0	0.0270636	0	0	0
															OTU515	Bacteria; Firmicutes; Clostridia; Clostridiales; Eubacteriaceae; Eubacterium; Eubacterium yuri	0	0	0	0	0.0270636	0	0	0	0	0	0	0
															OTU516	Bacteria; Bacteroidetes; Bacteroidia; Bacteroidales; Prevotellaceae; Prevotella; Prevotella nigrescens	0	0	0	0	0	0	0	0	0.0270636	0	0	0
															OTU517	Bacteria; Actinobacteria; Actinobacteria; Actinomycetales; Actinomycetaceae; Actinomyces; unclassified	0.0270636	0	0	0	0	0	0	0	0	0	0	0
															OTU518	Bacteria; Actinobacteria; Actinobacteria; Actinomycetales; Microbacteriaceae; Microbacterium; Microbacterium aurum	0	0	0	0	0	0	0	0	0.0270636	0	0	0
															OTU519	Bacteria; Actinobacteria; Actinobacteria; Actinomycetales; Actinomycetaceae; Actinomyces; unclassified	0	0	0	0	0	0	0	0	0.0270636	0	0	0
															OTU520	Bacteria; unclassified; unclassified; unclassified; unclassified; unclassified; unclassified	0	0	0	0	0.0270636	0	0	0	0	0	0	0
															OTU521	Bacteria; Proteobacteria; Betaproteobacteria; Neisseriales; Neisseriaceae; Neisseria; unclassified	0	0	0	0	0	0	0	0	0.0270636	0	0	0
															OTU522	Bacteria; unclassified; unclassified; unclassified; unclassified; unclassified; unclassified	0	0	0	0	0	0	0	0	0.0270636	0	0	0
															OTU523	Bacteria; unclassified; unclassified; unclassified; unclassified; unclassified; unclassified	0	0.0270636	0	0	0	0	0	0	0	0	0	0
															OTU524	Bacteria; Firmicutes; unclassified; unclassified; unclassified; unclassified; unclassified	0	0.0270636	0	0	0	0	0	0	0	0	0	0
															OTU525	Bacteria; Firmicutes; Clostridia; Clostridiales; Lachnospiraceae; Catonella; unclassified	0	0	0	0	0	0	0	0	0.0270636	0	0	0
															OTU526	Bacteria; Bacteroidetes; Bacteroidia; Bacteroidales; Prevotellaceae; Prevotella; unclassified	0	0.0270636	0	0	0	0	0	0	0	0	0	0
															OTU527	Bacteria; Proteobacteria; Betaproteobacteria; Neisseriales; Neisseriaceae; Neisseria; Neisseria subflava	0	0	0	0	0	0	0	0	0	0.0270636	0	0
															OTU528	Bacteria; unclassified; unclassified; unclassified; unclassified; unclassified; unclassified	0	0.0270636	0	0	0	0	0	0	0	0	0	0
															OTU529	Bacteria; Firmicutes; Bacilli; Lactobacillales; Streptococcaceae; Streptococcus; unclassified	0	0.0270636	0	0	0	0	0	0	0	0	0	0
															OTU530	Bacteria; Proteobacteria; Gammaproteobacteria; Pasteurellales; Pasteurellaceae; Actinobacillus; Haemophilus parahaemolyticus	0	0	0	0	0	0	0	0	0	0	0.0270636	0
															OTU531	Bacteria; Proteobacteria; Betaproteobacteria; Burkholderiales; Burkholderiaceae; Lautropia; unclassified	0	0	0	0	0	0	0	0	0	0	0.0270636	0
															OTU532	Bacteria; Proteobacteria; Betaproteobacteria; Neisseriales; Neisseriaceae; unclassified; unclassified	0	0.0270636	0	0	0	0	0	0	0	0	0	0
															OTU533	Bacteria; Bacteroidetes; Bacteroidia; Bacteroidales; Prevotellaceae; Prevotella; Prevotella melaninogenica	0	0	0	0	0	0	0	0	0.0270636	0	0	0
															OTU534	Bacteria; unclassified; unclassified; unclassified; unclassified; unclassified; unclassified	0	0.0270636	0	0	0	0	0	0	0	0	0	0
															OTU535	Bacteria; unclassified; unclassified; unclassified; unclassified; unclassified; unclassified	0	0	0	0	0	0	0	0	0.0270636	0	0	0
															OTU536	Bacteria; Bacteroidetes; Bacteroidia; Bacteroidales; Prevotellaceae; Prevotella; unclassified	0	0.0270636	0	0	0	0	0	0	0	0	0	0
															OTU537	Bacteria; Proteobacteria; Betaproteobacteria; Burkholderiales; Burkholderiaceae; Lautropia; unclassified	0	0	0	0	0	0	0.0270636	0	0	0	0	0
															OTU538	Bacteria; Proteobacteria; Betaproteobacteria; Neisseriales; Neisseriaceae; Neisseria; Neisseria subflava	0	0	0	0	0	0	0	0	0	0.0270636	0	0
															OTU539	Bacteria; Proteobacteria; Betaproteobacteria; Neisseriales; Neisseriaceae; Neisseria; unclassified	0	0.0270636	0	0	0	0	0	0	0	0	0	0
															OTU540	Bacteria; Proteobacteria; Betaproteobacteria; Neisseriales; Neisseriaceae; Simonsiella; Simonsiella muelleri	0	0.0270636	0	0	0	0	0	0	0	0	0	0
															OTU541	Bacteria; Firmicutes; Clostridia; Clostridiales; Lachnospiraceae; unclassified; unclassified	0	0	0	0	0	0	0	0	0	0	0.0270636	0
															OTU542	Bacteria; Firmicutes; Bacilli; Lactobacillales; Streptococcaceae; Streptococcus; Streptococcus salivarius	0	0	0	0	0	0	0.0270636	0	0	0	0	0
															OTU543	Bacteria; Proteobacteria; Gammaproteobacteria; Pasteurellales; Pasteurellaceae; Haemophilus; Haemophilus influenzae	0	0	0	0	0	0	0	0	0	0	0.0270636	0
															OTU544	Bacteria; Tenericutes; Erysipelotrichi; Erysipelotrichales; Erysipelotrichaceae; unclassified; unclassified	0	0	0	0	0	0	0.0270636	0	0	0	0	0
															OTU545	Bacteria; Spirochaetes; Spirochaetes; Spirochaetales; Spirochaetaceae; Treponema; Treponema parvum	0	0	0	0	0	0	0	0	0	0	0	0.0270636
															OTU546	Bacteria; TM7; TM7-3; CW040; F16; unclassified; unclassified	0	0.0270636	0	0	0	0	0	0	0	0	0	0
															OTU547	Bacteria; Firmicutes; Clostridia; Clostridiales; Peptococcaceae; Peptococcus; unclassified	0	0.0270636	0	0	0	0	0	0	0	0	0	0
															OTU548	Bacteria; Firmicutes; Bacilli; Lactobacillales; Streptococcaceae; Streptococcus; unclassified	0	0	0	0.0270636	0	0	0	0	0	0	0	0
															OTU549	Bacteria; unclassified; unclassified; unclassified; unclassified; unclassified; unclassified	0	0	0	0.0270636	0	0	0	0	0	0	0	0
															OTU550	Bacteria; Fusobacteria; Fusobacteria; Fusobacteriales; Fusobacteriaceae; Leptotrichia; unclassified	0	0	0	0.0270636	0	0	0	0	0	0	0	0
															OTU551	Bacteria; Bacteroidetes; Bacteroidia; Bacteroidales; Porphyromonadaceae; Porphyromonas; Porphyromonas endodontalis	0	0	0	0	0	0	0	0	0.0270636	0	0	0
															OTU552	Bacteria; unclassified; unclassified; unclassified; unclassified; unclassified; unclassified	0	0	0	0.0270636	0	0	0	0	0	0	0	0
															OTU553	Bacteria; unclassified; unclassified; unclassified; unclassified; unclassified; unclassified	0	0.0270636	0	0	0	0	0	0	0	0	0	0
															OTU554	Bacteria; TM7; TM7-3; CW040; F16; unclassified; unclassified	0	0.0270636	0	0	0	0	0	0	0	0	0	0
															OTU555	Bacteria; Firmicutes; Clostridia; Clostridiales; unclassified; unclassified; unclassified	0	0	0	0	0	0	0	0	0	0.0270636	0	0
															OTU556	Bacteria; Tenericutes; Erysipelotrichi; Erysipelotrichales; Erysipelotrichaceae; Clostridium; unclassified	0	0	0	0	0	0	0.0270636	0	0	0	0	0
															OTU557	Bacteria; Fusobacteria; Fusobacteria; Fusobacteriales; Fusobacteriaceae; unclassified; unclassified	0	0	0	0	0	0	0	0	0.0270636	0	0	0
															OTU558	Bacteria; unclassified; unclassified; unclassified; unclassified; unclassified; unclassified	0	0	0	0	0	0	0	0	0.0270636	0	0	0
															OTU559	Bacteria; Fusobacteria; Fusobacteria; Fusobacteriales; Fusobacteriaceae; Sneathia; unclassified	0	0	0	0	0	0	0	0	0.0270636	0	0	0
															OTU560	Bacteria; Actinobacteria; Actinobacteria; Actinomycetales; Microbacteriaceae; Microbacterium; Microbacterium aurum	0	0	0	0	0	0	0	0	0.0270636	0	0	0
															OTU561	Bacteria; Proteobacteria; Gammaproteobacteria; Pasteurellales; Pasteurellaceae; unclassified; unclassified	0	0	0	0	0	0	0	0	0.0270636	0	0	0
															OTU562	Bacteria; unclassified; unclassified; unclassified; unclassified; unclassified; unclassified	0	0	0	0	0	0	0	0	0.0270636	0	0	0
															OTU563	Bacteria; Fusobacteria; Fusobacteria; Fusobacteriales; Fusobacteriaceae; Fusobacterium; unclassified	0	0	0	0	0	0	0	0	0.0270636	0	0	0
															OTU564	Bacteria; unclassified; unclassified; unclassified; unclassified; unclassified; unclassified	0	0	0	0	0	0	0	0	0.0270636	0	0	0
															OTU565	Bacteria; unclassified; unclassified; unclassified; unclassified; unclassified; unclassified	0	0	0	0	0	0	0	0	0.0270636	0	0	0
															OTU566	Bacteria; Spirochaetes; Spirochaetes; Spirochaetales; Spirochaetaceae; Treponema; unclassified	0	0	0	0	0	0	0	0	0.0270636	0	0	0
															OTU567	Bacteria; Fusobacteria; Fusobacteria; Fusobacteriales; Fusobacteriaceae; Leptotrichia; unclassified	0	0	0	0	0	0.0270636	0	0	0	0	0	0
															OTU568	Bacteria; Firmicutes; unclassified; unclassified; unclassified; unclassified; unclassified	0	0.0270636	0	0	0	0	0	0	0	0	0	0
															OTU569	Bacteria; Proteobacteria; Betaproteobacteria; Neisseriales; Neisseriaceae; Neisseria; Neisseria subflava	0	0	0	0	0	0	0	0	0.0270636	0	0	0
															OTU570	Bacteria; Firmicutes; Clostridia; Clostridiales; Veillonellaceae; Dialister; Dialister pneumosintes	0	0.0270636	0	0	0	0	0	0	0	0	0	0
															OTU571	Bacteria; Proteobacteria; Betaproteobacteria; Neisseriales; Neisseriaceae; unclassified; unclassified	0	0	0	0	0	0	0	0	0.0270636	0	0	0
															OTU572	Bacteria; Actinobacteria; Actinobacteria; Actinomycetales; Corynebacteriaceae; Corynebacterium; Corynebacterium durum	0	0	0	0	0.0270636	0	0	0	0	0	0	0
															OTU573	Bacteria; Firmicutes; Bacilli; Lactobacillales; Streptococcaceae; Streptococcus; Streptococcus oralis	0	0	0	0	0	0	0.0270636	0	0	0	0	0
															OTU574	Bacteria; Proteobacteria; Betaproteobacteria; Neisseriales; Neisseriaceae; Neisseria; unclassified	0	0	0	0	0	0	0	0	0	0.0270636	0	0
															OTU575	Bacteria; Bacteroidetes; Bacteroidia; Bacteroidales; Prevotellaceae; Prevotella; unclassified	0	0	0	0	0	0	0	0	0	0.0270636	0	0
															OTU576	Bacteria; Proteobacteria; Betaproteobacteria; Burkholderiales; unclassified; unclassified; unclassified	0	0	0	0	0	0	0	0	0	0	0.0270636	0
															OTU577	Bacteria; SR1; unclassified; unclassified; unclassified; unclassified; unclassified	0	0	0	0	0	0.0270636	0	0	0	0	0	0
															OTU578	Bacteria; Actinobacteria; Actinobacteria; Actinomycetales; Micrococcaceae; Rothia; Rothia aeria	0	0	0	0	0	0	0	0	0	0.0270636	0	0
															OTU579	Bacteria; Proteobacteria; Gammaproteobacteria; Xanthomonadales; Xanthomonadaceae; Pseudoxanthomonas; unclassified	0	0	0	0	0	0	0	0	0.0270636	0	0	0
															OTU580	Bacteria; Actinobacteria; Actinobacteria; Actinomycetales; Actinomycetaceae; Actinomyces; unclassified	0	0	0	0	0	0	0.0270636	0	0	0	0	0
															OTU581	Bacteria; Actinobacteria; Actinobacteria; Actinomycetales; Corynebacteriaceae; Corynebacterium; Corynebacterium matruchotii	0	0	0	0	0	0	0	0	0	0.0270636	0	0
															OTU582	Bacteria; Cyanobacteria; Chloroplast; Streptophyta; unclassified; unclassified; unclassified	0	0	0	0	0	0	0	0	0.0270636	0	0	0
															OTU583	Bacteria; Actinobacteria; Actinobacteria; Actinomycetales; Actinomycetaceae; Actinomyces; unclassified	0.0270636	0	0	0	0	0	0	0	0	0	0	0
															OTU584	Bacteria; Tenericutes; Erysipelotrichi; Erysipelotrichales; Erysipelotrichaceae; Bulleidia; unclassified	0	0	0	0	0	0.0270636	0	0	0	0	0	0
															OTU585	Bacteria; Actinobacteria; Actinobacteria; Actinomycetales; Micrococcaceae; Rothia; unclassified	0	0	0	0	0	0	0	0.0270636	0	0	0	0
															OTU586	Bacteria; Fusobacteria; Fusobacteria; Fusobacteriales; Fusobacteriaceae; Fusobacterium; unclassified	0	0	0	0	0	0	0	0	0	0	0.0270636	0
															OTU587	Bacteria; Actinobacteria; Actinobacteria; Actinomycetales; Micrococcaceae; unclassified; unclassified	0	0	0	0	0	0	0	0	0	0	0.0270636	0
															OTU588	Bacteria; Actinobacteria; Actinobacteria; Actinomycetales; Micrococcaceae; Rothia; unclassified	0	0	0	0	0	0	0	0	0	0	0	0.0270636
															OTU589	Bacteria; Proteobacteria; Gammaproteobacteria; Pseudomonadales; Moraxellaceae; unclassified; unclassified	0	0	0	0	0	0	0	0	0.0270636	0	0	0
															OTU590	Bacteria; Proteobacteria; Betaproteobacteria; Neisseriales; Neisseriaceae; unclassified; unclassified	0	0.0270636	0	0	0	0	0	0	0	0	0	0
															OTU591	Bacteria; Firmicutes; Bacilli; Gemellales; Gemellaceae; Gemella; unclassified	0	0	0	0.0270636	0	0	0	0	0	0	0	0
															OTU592	Bacteria; TM7; TM7-3; EW055; unclassified; unclassified; unclassified	0	0.0270636	0	0	0	0	0	0	0	0	0	0
															OTU593	Bacteria; Actinobacteria; Actinobacteria; Actinomycetales; Corynebacteriaceae; Corynebacterium; Corynebacterium durum	0	0.0270636	0	0	0	0	0	0	0	0	0	0
															OTU594	Bacteria; Fusobacteria; Fusobacteria; Fusobacteriales; Fusobacteriaceae; Leptotrichia; unclassified	0	0	0	0.0270636	0	0	0	0	0	0	0	0
															OTU595	Bacteria; Firmicutes; Clostridia; Clostridiales; Lachnospiraceae; Catonella; unclassified	0	0	0	0	0	0.0270636	0	0	0	0	0	0
															OTU596	Bacteria; Firmicutes; Clostridia; Clostridiales; Veillonellaceae; Veillonella; Veillonella dispar	0	0	0	0	0.0270636	0	0	0	0	0	0	0
															OTU597	Bacteria; Fusobacteria; Fusobacteria; Fusobacteriales; Fusobacteriaceae; Fusobacterium; unclassified	0	0	0	0	0.0270636	0	0	0	0	0	0	0
															OTU598	Bacteria; Firmicutes; Bacilli; Lactobacillales; Streptococcaceae; Streptococcus; Streptococcus pneumoniae	0	0	0	0.0270636	0	0	0	0	0	0	0	0
															OTU599	Bacteria; Fusobacteria; Fusobacteria; Fusobacteriales; Fusobacteriaceae; Fusobacterium; unclassified	0	0.0270636	0	0	0	0	0	0	0	0	0	0
															OTU600	Bacteria; Proteobacteria; Betaproteobacteria; Burkholderiales; Burkholderiaceae; Lautropia; unclassified	0	0	0	0	0	0	0	0	0	0.0270636	0	0
															OTU601	Bacteria; Fusobacteria; Fusobacteria; Fusobacteriales; Fusobacteriaceae; Leptotrichia; unclassified	0	0	0	0.0270636	0	0	0	0	0	0	0	0
															OTU602	Bacteria; Firmicutes; Clostridia; Clostridiales; Veillonellaceae; Selenomonas; Selenomonas sputigena	0	0.0270636	0	0	0	0	0	0	0	0	0	0
															OTU603	Bacteria; Bacteroidetes; Flavobacteria; Flavobacteriales; Flavobacteriaceae; Capnocytophaga; unclassified	0	0	0	0	0	0	0	0	0.0270636	0	0	0
															OTU604	Bacteria; Proteobacteria; Betaproteobacteria; Neisseriales; Neisseriaceae; Neisseria; unclassified	0	0	0	0.0270636	0	0	0	0	0	0	0	0
															OTU605	Bacteria; Actinobacteria; Actinobacteria; Coriobacteriales; Coriobacteriaceae; Atopobium; Atopobium rimae	0	0	0	0	0.0270636	0	0	0	0	0	0	0
															OTU606	Bacteria; Firmicutes; Clostridia; Clostridiales; Veillonellaceae; Selenomonas; unclassified	0	0	0	0	0	0	0	0	0	0.0270636	0	0
															OTU607	Bacteria; Proteobacteria; Gammaproteobacteria; Pasteurellales; Pasteurellaceae; Aggregatibacter; Aggregatibacter aphrophilus	0	0	0	0	0	0	0	0	0.0270636	0	0	0
															OTU608	Bacteria; Firmicutes; Bacilli; Gemellales; Gemellaceae; Gemella; Gemella sanguinis	0	0.0270636	0	0	0	0	0	0	0	0	0	0
															OTU609	Bacteria; unclassified; unclassified; unclassified; unclassified; unclassified; unclassified	0	0	0	0	0	0	0	0	0	0.0270636	0	0
															OTU610	Bacteria; Bacteroidetes; Flavobacteria; Flavobacteriales; Flavobacteriaceae; unclassified; unclassified	0	0	0	0	0	0	0	0	0	0.0270636	0	0
															OTU611	Bacteria; Firmicutes; Bacilli; Lactobacillales; Streptococcaceae; Streptococcus; Streptococcus pseudopneumoniae	0	0	0	0.0270636	0	0	0	0	0	0	0	0
															OTU612	Bacteria; Firmicutes; Clostridia; Clostridiales; Veillonellaceae; Veillonella; Veillonella dispar	0	0	0	0	0	0.0270636	0	0	0	0	0	0
															OTU613	Bacteria; Bacteroidetes; Bacteroidia; Bacteroidales; Prevotellaceae; Prevotella; Prevotella tannerae	0	0	0	0	0	0	0	0	0.0270636	0	0	0
															OTU614	Bacteria; Fusobacteria; Fusobacteria; Fusobacteriales; Fusobacteriaceae; Fusobacterium; unclassified	0	0.0270636	0	0	0	0	0	0	0	0	0	0
															OTU615	Bacteria; Firmicutes; Bacilli; Lactobacillales; Streptococcaceae; Streptococcus; Streptococcus pneumoniae	0	0	0	0.0270636	0	0	0	0	0	0	0	0
															OTU616	Bacteria; Proteobacteria; Alphaproteobacteria; Rhizobiales; Methylobacteriaceae; Methylobacterium; Methylobacterium adhaesivum	0	0	0	0	0	0	0	0	0	0	0.0270636	0
															OTU617	Bacteria; Proteobacteria; Gammaproteobacteria; Pseudomonadales; Moraxellaceae; Acinetobacter; unclassified	0	0	0	0	0	0	0	0	0.0270636	0	0	0
															OTU618	Bacteria; unclassified; unclassified; unclassified; unclassified; unclassified; unclassified	0	0	0	0.0270636	0	0	0	0	0	0	0	0
															OTU619	Bacteria; Firmicutes; Bacilli; Lactobacillales; Carnobacteriaceae; Granulicatella; Granulicatella adiacens	0	0	0	0	0	0	0	0	0.0270636	0	0	0
															OTU620	Bacteria; Proteobacteria; Betaproteobacteria; Burkholderiales; Comamonadaceae; Hylemonella; unclassified	0	0	0	0	0	0	0	0	0.0270636	0	0	0
															OTU621	Bacteria; Firmicutes; Bacilli; Lactobacillales; Leuconostocaceae; Leuconostoc; unclassified	0	0	0.0270636	0	0	0	0	0	0	0	0	0
															OTU622	Bacteria; Proteobacteria; Betaproteobacteria; Neisseriales; Neisseriaceae; unclassified; unclassified	0	0	0	0	0	0	0.0270636	0	0	0	0	0
															OTU623	Bacteria; Fusobacteria; Fusobacteria; Fusobacteriales; Fusobacteriaceae; unclassified; unclassified	0	0	0	0	0	0	0	0	0.0270636	0	0	0
															OTU624	Bacteria; Proteobacteria; Gammaproteobacteria; Pseudomonadales; Moraxellaceae; Acinetobacter; Acinetobacter schindleri	0	0	0	0	0	0	0	0	0.0270636	0	0	0
															OTU625	Bacteria; Proteobacteria; Betaproteobacteria; Neisseriales; Neisseriaceae; Neisseria; Neisseria subflava	0	0	0	0	0.0270636	0	0	0	0	0	0	0
															OTU626	Bacteria; unclassified; unclassified; unclassified; unclassified; unclassified; unclassified	0	0	0.0270636	0	0	0	0	0	0	0	0	0
															OTU627	Bacteria; Firmicutes; Clostridia; Clostridiales; Veillonellaceae; Selenomonas; unclassified	0.0270636	0	0	0	0	0	0	0	0	0	0	0
															OTU628	Bacteria; Firmicutes; Bacilli; Lactobacillales; Streptococcaceae; Streptococcus; Streptococcus oralis	0	0	0	0	0	0	0.0270636	0	0	0	0	0
															OTU629	Bacteria; Proteobacteria; Betaproteobacteria; Neisseriales; Neisseriaceae; Neisseria; Neisseria subflava	0	0.0270636	0	0	0	0	0	0	0	0	0	0
															OTU630	Bacteria; Firmicutes; Bacilli; Lactobacillales; Streptococcaceae; Streptococcus; Streptococcus oralis	0	0	0	0.0270636	0	0	0	0	0	0	0	0
[truncated: 37 more columns]
